# Supplementary material for: Organocatalysis for the Asymmetric Michael Addition of Cycloketones and α, β-Unsaturated Nitroalkenes
Source: MDPI journal article supplement (doi:10.3390/catal11081004), 2021-08-20
Supplement: s1 [file s1]

# Enantioselective Thiolysis and Aminolysis of Cyclic Anhydrides Using a Chiral-Diamine- Derived Thiourea Catalyst

*Jae Ho Shim,\* Sung Joo Park, Byung Kook Ahn, Ji Yeon Lee, Hyeon Soo Kim and*

*Deok-Chan Ha\**

*Department of Anatomy, Korea University College of Medicine, 46, Gaeunsa 2-gil, Seongbuk-gu, Seoul, 02842, Republic of Korea*

*E-mail: shimjh3000@korea.ac.kr*

*Department of Chemistry, Korea University, 145 Anam-ro Seongbuk-gu, Seoul 02841, Korea*

*E-mail: dechha@korea.ac.kr*

## Supporting Information

### Table of Contents

|                                                               |              |
|---------------------------------------------------------------|--------------|
| <b>1 Compound Characterization Data.....</b>                  | <b>S-2</b>   |
| <b>2. Copy of HPLC, NMR and MASS Spectra.....</b>             | <b>S-16</b>  |
| <b>3. DFT Calculations for all Calculated Structures.....</b> | <b>S-68</b>  |
| <b>4. Reference.....</b>                                      | <b>S-112</b> |

## 1. Compound Characterization Data

### 1-[(1R,2R)-2-Amino-1,2-diphenylethyl]-3-[3,5-bis(trifluoromethyl)phenyl]thiourea(1a)

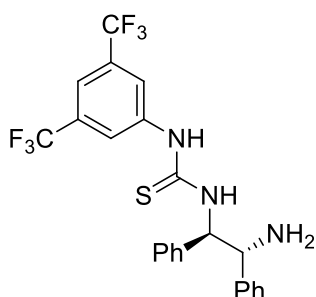

$[\alpha]_{\text{D}}^{25} +13.5$  ( $c$  1.0,  $\text{CH}_3\text{Cl}$ );  $^1\text{H}$  NMR (500 MHz,  $\text{DMSO-}d_6$ )  $\delta$  8.25 (s, 2H), 7.78 (s, 1H), 7.32~7.15 (m, 13H), 5.99 (d,  $J$  = 3 Hz, 1H), 4.77 (d,  $J$  = 3 Hz, 1H) ppm;  $^{13}\text{C}$  NMR (125 MHz,  $\text{DMSO-}d_6$ )  $\delta$  180.51, 143.26, 142.48, 130.82, 130.56, 128.51, 128.29, 127.66, 127.55, 127.38, 124.78, 122.62, 121.34, 116.08, 63.66, 59.94 ppm; IR (KBr) 3305, 3032, 2963, 1652, 1601, 1557, 1383, 1277, 1262, 803, 700  $\text{cm}^{-1}$ ; HRMS (FAB+) for  $\text{C}_{23}\text{H}_{19}\text{F}_6\text{N}_3\text{S}$   $[\text{M}+\text{H}]^+$  Calcd: 484.1282, Found: 484.1254;

### 1-[(1R,2R)-2-Amino-1,2-diphenylethyl]-3-isopropylthiourea (1b)

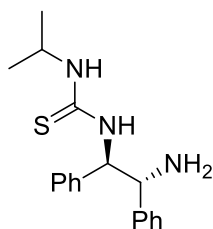

$[\alpha]_{\text{D}}^{25} +62.3$  ( $c$  1.0,  $\text{CHCl}_3$ );  $^1\text{H}$  NMR (500 MHz,  $\text{CDCl}_3$ )  $\delta$  7.37~7.21 (m, 11H), 6.04 (br s, 1H), 5.09 (br s, 1H), 4.30 (s, 1H), 4.15 (br s, 1H), 1.73 (s, 2H), 1.09~1.03 (m, 6H) ppm;  $^{13}\text{C}$  NMR (125 MHz,  $\text{CDCl}_3$ )  $\delta$  180.68, 142.06, 129.00, 128.75, 127.88, 126.91, 64.12, 60.55, 46.39, 22.70 ppm; IR (KBr) 3335, 2966, 1527, 1326, 1273, 966, 695, 514  $\text{cm}^{-1}$ ; HRMS (ESI+) for  $\text{C}_{18}\text{H}_{23}\text{N}_3\text{S}$   $[\text{M}+\text{H}]^+$  Calcd: 314.1691, Found: 314.1627;

**(S)-5-Nitro-4-phenylpentan-2-one (2a)<sup>1</sup>**

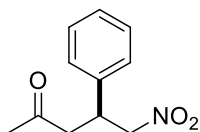

$[\alpha]_{\text{D}}^{20} +4.5$  (c 1.0,  $\text{CHCl}_3$ );  $^1\text{H}$  NMR (400 MHz,  $\text{CDCl}_3$ )  $\delta$  7.35~7.21 (m, 5H), 4.72~4.67 (dd,  $J = 12.3, 7.0$  Hz, 1H), 4.63~4.58 (dd,  $J = 12.3, 7.6$  Hz, 1H), 4.05~3.98 (m, 1H), 2.92 (d,  $J = 7.0$  Hz, 2H), 2.13 (s, 3H) ppm;  $^{13}\text{C}$  NMR (100 MHz,  $\text{CDCl}_3$ )  $\delta$  205.67, 138.99, 129.30, 128.14, 127.59, 79.67, 46.33, 39.23, 30.65 ppm; IR (KBr) 3064, 3035, 2968, 2948, 2919, 2902, 1714, 1548, 1384, 1361, 1163, 758, 696, 548  $\text{cm}^{-1}$ ; LRMS (FAB<sup>+</sup>) for  $\text{C}_{11}\text{H}_{13}\text{NO}_3$   $[\text{M}+\text{H}]^+$  Calcd: 208, Found: 208; HPLC [Chiralcel AD-H, hexane/ 2-propanol = 4/96, flow rate = 1.0 mL/min,  $\lambda = 254$  nm, retention times: (major) 28.2 min, (minor) 38.3 min];

**(R)-2-[(S)-2-Nitro-1-phenylethyl]cyclohexanone (2b)<sup>1,3</sup>**

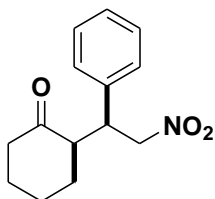

$[\alpha]_{\text{D}}^{26} +37.5$  (c 0.100,  $\text{CHCl}_3$ );  $^1\text{H}$  NMR (300 MHz,  $\text{CDCl}_3$ ) 7.34~7.23 (m, 3H), 7.16 (d,  $J = 7$  Hz, 2H), 4.95 (dd,  $J = 12, 5$  Hz, 1H), 4.63 (dd,  $J = 12, 10$  Hz, 1H), 3.76 (dt,  $J = 10, 5$  Hz, 1H), 2.68 (m,  $J = 11, 9, 8$  Hz, 1H), 2.49~2.33 (m, 2H), 2.10~2.04 (m, 1H), 1.79~1.52 (m, 4H), 1.52~1.19 (m, 1H);  $^{13}\text{C}$  NMR (100 MHz,  $\text{CDCl}_3$ ) 211.9, 137.6, 128.8, 128.1, 127.7, 78.8, 52.4, 43.8, 42.7, 33.1, 28.5, 24.9, IR(KBr) 3855.1, 3650.7, 3448.2, 2921.1, 1700.9, 1552.4, 1382.7, 1243.9, 1130.1, 696.2, 561.2  $\text{cm}^{-1}$ ; LRMS(FAB<sup>+</sup>) for  $\text{C}_{14}\text{H}_{17}\text{NO}_3$   $[\text{M}+\text{H}]^+$  Calcd: 247, Found: 247; chiral-phase HPLC, AS-H column (*i*-PrOH/hexane = 20:80), 254 nm, flow rate = 0.5 ml/min,  $t_{\text{r}}$  (major) = 19.74 min,  $t_{\text{r}}$  (minor) = 27.57 min.

**(R)-2-[(S)-2-Nitro-1-phenylethyl]cyclopentanone(2c)<sup>1</sup>**

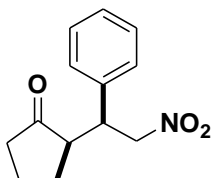

$[\alpha]_{\text{D}}^{23} +12.1$  (c 1.00,  $\text{CHCl}_3$ );  $^1\text{H}$  NMR (300 MHz,  $\text{CDCl}_3$ ) 7.34-7.23 (m, 3H), 7.20-7.15 (m, 2H), 5.37-5.30 (m, 1H), 4.71 (dd,  $J = 13, 10$  Hz, 1H), 3.76-3.65 (m, 1H), 2.44-2.31 (m, 2H), 2.19-2.06 (m, 1H), 1.94-1.83 (m, 2H), 1.76-1.66 (m, 1H), 1.55-1.41 (m, 1H);  $^{13}\text{C}$  NMR (100 MHz,  $\text{CDCl}_3$ ) 218.5, 137.6, 128.8, 127.9, 78.2, 50.4, 44.1, 38.6, 28.3, 20.2; IR (KBr) 3363.4, 2921.7, 1731.8, 1552.4, 1378.9, 1124.3  $\text{cm}^{-1}$ ; LRMS(FAB+) for  $\text{C}_{13}\text{H}_{15}\text{NO}_3$ [M+H]<sup>+</sup> Calcd: 234, Found: 234; chiral-phase HPLC, AS-H column (*i*-PrOH/hexane = 20:80), 254 nm, flow rate = 0.5 ml/min,  $t_{\text{r}}$  (major) = 22.74 min,  $t_{\text{r}}$  (minor) = 30.47 min.

**(S)-3-[(S)-2-Nitro-1-phenylethyl]tetrahydropyran-4-one (2d)<sup>3</sup>**

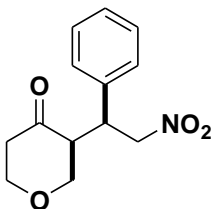

$[\alpha]_{\text{D}}^{23} +14.4$  (c 1.00,  $\text{CHCl}_3$ );  $^1\text{H}$  NMR (300 MHz,  $\text{CDCl}_3$ ) 7.37-7.26 (m, 3H), 7.21-7.16 (m, 2H), 4.96 (dd,  $J = 12, 5$  Hz, 1H), 4.64 (dd,  $J = 12, 10$  Hz, 1H), 4.20-4.10 (m, 1H), 3.87-3.68 (m, 2H), 3.70 (dd,  $J = 11, 5$  Hz, 1H), 3.27 (dd,  $J = 11, 10$  Hz, 1H), 2.93-2.83 (m, 1H), 2.73-2.61 (m, 1H), 2.60-2.53 (m, 1H);  $^{13}\text{C}$  NMR (100 MHz,  $\text{CDCl}_3$ ) 207.4, 136.1, 128.9, 127.8, 78.6, 71.5, 68.9, 53.2, 42.9, 41.2, 29.6; IR (KBr) 3278.5, 2923.7, 2291.1, 1735.7, 1457.9, 1243.9, 1087.7  $\text{cm}^{-1}$ ; chiral-phase HPLC, AS-H column (*i*-PrOH/hexane = 50:50), 254 nm, flow rate = 0.5 ml/min,  $t_{\text{r}}$  (major) = 19.29 min,  $t_{\text{r}}$  (minor) = 25.53 min.

**(R)-3-[(S)-2-Nitro-1-phenylethyl]tetrahydrothiopyran-4-one (2e)<sup>3</sup>**

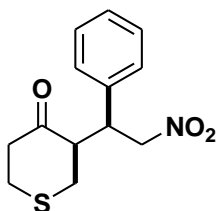

$[\alpha]_{\text{D}}^{23} +21.9$  ( $c$  1.00,  $\text{CHCl}_3$ );  $^1\text{H}$  NMR (300 MHz,  $\text{CDCl}_3$ ) 7.37-7.26 (m, 3H), 7.21-7.16 (m, 2H), 4.96 (dd,  $J$  = 12, 5 Hz, 1H), 4.64 (dd,  $J$  = 12, 10 Hz, 1H), 4.20-4.10 (m, 1H), 3.87-3.68 (m, 2H), 3.70 (dd,  $J$  = 11, 5 Hz, 1H), 3.27 (dd,  $J$  = 11, 10 Hz, 1H), 2.93-2.83 (m, 1H), 2.73-2.61 (m, 1H), 2.60-2.53 (m, 1H);  $^{13}\text{C}$  NMR (100 MHz,  $\text{CDCl}_3$ ) 209.5, 136.5, 129.3, 128.3, 128.2, 78.6, 55.0, 44.6, 53.5, 35.1, 31.6; IR (KBr) 3367.2, 1646.9, 1376.9, 1093.4  $\text{cm}^{-1}$ ; chiral-phase HPLC, AS-H column (*i*-PrOH/hexane = 50:50), 254 nm, flow rate = 0.5 ml/min,  $t_{\text{r}}$  (major) = 18.40 min,  $t_{\text{r}}$  (minor) = 26.84 min.

#### (S)-4-Nitro-1,3-diphenyl-butan-1-one (2f)

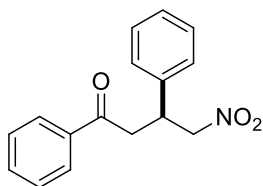

$[\alpha]_{\text{D}}^{20} -18.5$  ( $c$  1.0,  $\text{CHCl}_3$ );  $^1\text{H}$  NMR (500 MHz,  $\text{CDCl}_3$ )  $\delta$  7.91~7.92 (m, 2H), 7.59~7.26 (m, 8H), 4.85~4.81 (dd,  $J$  = 12.5, 6.7 Hz, 1H), 4.71~4.67 (dd,  $J$  = 12.5, 7.8 Hz, 1H), 4.26~4.20 (m, 1H), 3.51~3.46 (dd,  $J$  = 17.7, 6.4 Hz, 1H), 3.45~3.40 (dd,  $J$  = 17.7, 7.5 Hz, 1H) ppm;  $^{13}\text{C}$  NMR (125 MHz,  $\text{CDCl}_3$ )  $\delta$  196.87, 139.15, 136.39, 133.60, 129.09, 128.77, 128.04, 127.90, 127.48, 79.58, 41.54, 39.30 ppm; IR (KBr) 3058, 3029, 2920, 1687, 1544, 1440, 1367, 1268, 1224, 1084, 988, 764, 703, 623, 559  $\text{cm}^{-1}$ ; LRMS ( $\text{ESI}^+$ ) for  $\text{C}_{16}\text{H}_{15}\text{NO}_3$   $[\text{M}+\text{Na}]^+$  Calcd: 292.1, Found: 292.1; HPLC [Chiralcel AD-H, hexane/2-propanol = 90/10, flow rate = 1.0 mL/min,  $\lambda$  = 254 nm, retention times: (major) 12.8 min, (minor) 17.4 min];

#### (S)-5-Nitro-4-(p-tolyl)pentan-2-one (3a)<sup>7</sup>

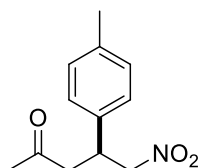

$[\alpha]_{\text{D}}^{20} +4.7$  (c 1.5,  $\text{CHCl}_3$ );  $^1\text{H}$  NMR (500 MHz,  $\text{CDCl}_3$ )  $\delta$  7.13~7.08 (m, 4H), 4.68~4.64 (dd,  $J = 12.3, 6.9$  Hz, 1H), 4.58~4.54 (dd,  $J = 12.1, 7.7$  Hz, 1H), 3.99~3.93 (m, 1H), 2.89 (d,  $J = 7.7$  Hz, 1H), 2.31 (s, 3H), 2.10 (s, 3H) ppm;  $^{13}\text{C}$  NMR (125 MHz,  $\text{CDCl}_3$ )  $\delta$  205.57, 137.62, 135.76, 129.74, 127.24, 79.63, 46.22, 38.76, 30.41, 21.05 ppm; IR (KBr) 3056, 3029, 2976, 2944, 2924, 1717, 1551, 1378, 1365, 1163, 816, 544  $\text{cm}^{-1}$ ; LRMS ( $\text{ESI}^+$ ) for  $\text{C}_{12}\text{H}_{15}\text{NO}_3$   $[\text{M}+\text{Na}]^+$  Calcd: 244.1, Found: 244.2; HPLC [Chiralcel AS-H, hexane/2-propanol = 80/20, flow rate = 1.0 mL/min,  $\lambda = 213$  nm, retention times: (major) 13.1 min, (minor) 20.4 min];

**(S)-4-(4-Methoxyphenyl)-5-nitropentan-2-one (3b) <sup>7</sup>**

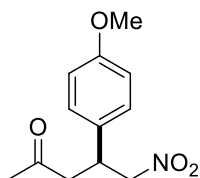

$[\alpha]_{\text{D}}^{20} -5.7$  (c 1.0,  $\text{CHCl}_3$ );  $^1\text{H}$  NMR (500 MHz,  $\text{CDCl}_3$ )  $\delta$  7.13 (d,  $J = 8.8$  Hz, 2H), 6.85 (d,  $J = 8.8$  Hz, 2H), 4.67~4.63 (dd,  $J = 12.3, 6.8$  Hz, 1H), 4.57~4.53 (dd,  $J = 12.3, 7.8$  Hz, 1H), 3.98~3.92 (m, 1H), 3.78 (s, 3H), 2.88 (d,  $J = 7.0$ , 2H), 2.11 (s, 3H) ppm;  $^{13}\text{C}$  NMR (125 MHz,  $\text{CDCl}_3$ )  $\delta$  205.55, 159.13, 130.67, 128.45, 114.44, 79.73, 55.26, 46.29, 38.42, 30.43 ppm; IR (KBr) 3028, 3002, 2960, 2901, 1715, 1550, 1517, 1260, 1180, 1033, 813, 544  $\text{cm}^{-1}$ ; LRMS ( $\text{ESI}^+$ ) for  $\text{C}_{12}\text{H}_{15}\text{NO}_4$   $[\text{M}+\text{Na}]^+$  Calcd: 260.1, Found: 260.1; HPLC [Chiralcel AS-H, hexane/2-propanol = 80/20, flow rate = 1.4 mL/min,  $\lambda = 213$  nm, retention times: (major) 16.2 min, (minor) 37.9 min];

**(S)-4-(4-Chlorophenyl)-5-nitropentan-2-one (3c) <sup>7</sup>**

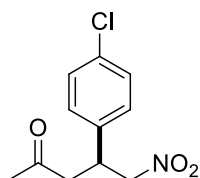

$[\alpha]_{\text{D}}^{20} -2.9$  ( $c$  1.0,  $\text{CHCl}_3$ );  $^1\text{H}$  NMR (500 MHz,  $\text{CDCl}_3$ )  $\delta$  7.32~7.29 (m, 2H), 7.17~7.15 (m, 2H), 4.70~4.66 (dd,  $J$  = 12.4, 6.7 Hz, 1H), 4.59~4.55 (dd,  $J$  = 12.4, 7.9 Hz, 1H), 4.02~3.96 (m, 1H), 2.94~2.90 (dd,  $J$  = 18.5, 7.0 Hz, 1H), 2.89~2.85 (dd,  $J$  = 19.0, 7.0 Hz, 1H), 2.12 (s, 3H) ppm;  $^{13}\text{C}$  NMR (125 MHz,  $\text{CDCl}_3$ )  $\delta$  205.03, 137.35, 133.79, 129.26, 128.82, 79.19, 45.97, 38.40, 30.39 ppm; LRMS ( $\text{ESI}^+$ ) for  $\text{C}_{11}\text{H}_{12}\text{ClNO}_3$   $[\text{M}+\text{Na}]^+$  Calcd: 264.0, Found: 264.1; HPLC [Chiralcel AD-H, hexane/2-propanol = 5/95, flow rate = 1.0 mL/min,  $\lambda$  = 254 nm, retention times: (major) 14.1 min, (minor) 21.9 min];  $R_f$  ( $\text{SiO}_2$ ,  $\text{EtOAc}/n$ -hexane = 1/5) = 0.22

**(S)-4-(4-Bromophenyl)-5-nitropentan-2-one (3d) <sup>7</sup>**

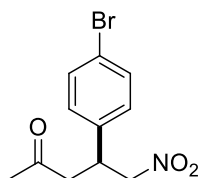

$[\alpha]_{\text{D}}^{20} -0.6$  ( $c$  0.4,  $\text{CHCl}_3$ );  $^1\text{H}$  NMR (500 MHz,  $\text{CDCl}_3$ )  $\delta$  7.45 (d,  $J$  = 7.0 Hz, 2H), 7.10 (d,  $J$  = 7.0 Hz, 2H), 4.69~4.66 (dd,  $J$  = 12.5, 6.5 Hz, 1H), 4.59~4.55 (dd,  $J$  = 12.7, 7.5 Hz, 1H), 4.0~3.95 (m, 1H), 2.88 (d,  $J$  = 7.5 Hz, 2H), 2.12 (s, 3H) ppm;  $^{13}\text{C}$  NMR (125 MHz,  $\text{CDCl}_3$ )  $\delta$  205.04, 137.91, 132.20, 129.18, 121.85, 79.10, 45.91, 38.46, 30.38 ppm; LRMS ( $\text{ESI}^+$ ) for  $\text{C}_{11}\text{H}_{12}\text{BrNO}_3$   $[\text{M}+\text{Na}]^+$  Calcd: 308.0, Found: 308.0; HPLC [Chiralcel AD-H, hexane/2-propanol = 80/20, flow rate = 1.0 mL/min,  $\lambda$  = 210 nm, retention times: (major) 10.9 min, (minor) 12.5 min];

**(S)-4-(2-Methoxyphenyl)-5-nitropentan-2-one (3e) <sup>7</sup>**

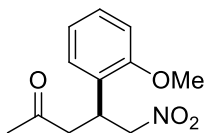

$[\alpha]_{\text{D}}^{20} +16.4$  ( $c$  1.6,  $\text{CHCl}_3$ );  $^1\text{H}$  NMR (500 MHz,  $\text{CDCl}_3$ )  $\delta$  7.26~7.23 (m, 1H), 7.15~7.13

(m, 1H), 6.92~6.87 (m, 2H), 4.76~4.69 (m, 2H), 4.25~4.19 (m, 1H), 3.86 (s, 3H), 3.05~3.0 (dd,  $J = 18.0, 7.5$  Hz, 1H), 2.98~2.93 (dd,  $J = 18.0, 7.0$  Hz, 1H), 2.13 (s, 3H) ppm;  $^{13}\text{C}$  NMR (125 MHz,  $\text{CDCl}_3$ )  $\delta$  206.16, 157.09, 129.31, 129.01, 126.44, 120.94, 110.99, 77.85, 55.35, 44.52, 35.33, 30.25 ppm; LRMS( $\text{ESI}^+$ ) for  $\text{C}_{12}\text{H}_{15}\text{NO}_4$  [ $\text{M}+\text{Na}$ ] $^+$  Calcd: 260.1, Found: 260.1; HPLC [Chiralcel AD-H, hexane/2-propanol = 5/95, flow rate = 1.0 mL/min,  $\lambda = 254$  nm, retention times: (major) 14.1 min, (minor) 21.9 min];

**(S)-4-(Furan-2-yl)-5-nitropentan-2-one (3f)<sup>7</sup>**

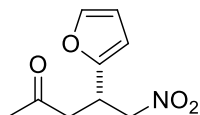

$[\alpha]_{\text{D}}^{20} -8.1$  ( $c$  1.0,  $\text{CHCl}_3$ );  $^1\text{H}$  NMR (500 MHz,  $\text{CDCl}_3$ )  $\delta$  7.34~7.33 (dd,  $J = 1.8, 0.7$  Hz, 1H), 6.30~6.29 (dd,  $J = 3.2, 1.8$  Hz, 1H), 6.14 (d,  $J = 3.2$  Hz, 1H), 4.71~4.68 (dd,  $J = 12.6, 6.6$  Hz, 1H), 4.67~4.64 (dd,  $J = 12.6, 6.6$  Hz, 1H), 4.13~4.07 (m, 1H), 3.00~2.95 (dd,  $J = 16.7, 5.2$  Hz, 1H), 2.93~2.87 (dd,  $J = 16.7, 6.0$  Hz, 1H), 2.18 (s, 3H) ppm;  $^{13}\text{C}$  NMR (125 MHz,  $\text{CDCl}_3$ )  $\delta$  205.11, 151.69, 142.31, 110.50, 107.10, 77.07, 43.49, 32.89, 30.22 ppm; IR (flim) 3151, 3124, 2920, 1714, 1552, 1430, 1377, 1165, 1015, 741  $\text{cm}^{-1}$ ; LRMS ( $\text{ESI}^+$ ) for  $\text{C}_9\text{H}_{11}\text{NO}_4$  [ $\text{M}+\text{Na}$ ] $^+$  Calcd: 220.1, Found: 220.1; HPLC [Chiralcel AD-H, hexane/2-propanol = 94/6, flow rate = 1.0 mL/min,  $\lambda = 213$  nm, retention times: (major) 10.5 min, (minor) 11.6 min];

**(R)-2-[(S)-1-(3-Methylphenyl)-2-nitroethyl]cyclohexanone(4a)<sup>2</sup>**

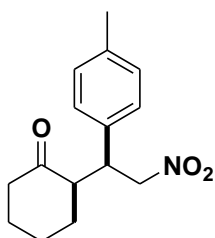

$[\alpha]_{\text{D}}^{23} +10.8$  ( $c$  1.00,  $\text{CHCl}_3$ );  $^1\text{H}$  NMR (300 MHz,  $\text{CDCl}_3$ ) 7.12 (d,  $J = 8$  Hz, 2H), 7.04 (d,  $J = 8$  Hz, 2H), 4.91 (dd,  $J = 12, 5$  Hz, 1H), 4.60 (dd,  $J = 12, 10$  Hz, 1H), 3.72 (dt,  $J =$

10, 5 Hz, 1H), 2.71-2.62 (m, 1H), 2.50-2.37 (m, 2H), 2.10 (s, 3H), 2.08 (m, 1H), 1.81-1.53 (m, 5H);  $^{13}\text{C}$  NMR (75 MHz,  $\text{CDCl}_3$ )  $\delta$  212.0, 137.4, 134.5, 129.5, 127.9, 78.9, 52.5, 43.5, 42.7, 33.1, 28.5, 24.9, 21.0; IR (KBr) 3286.2, 2925.6, 1704.8, 1552.4, 1378.9, 1130.1, 819.6  $\text{cm}^{-1}$ ; LRMS(FAB+) for  $\text{C}_{15}\text{H}_{19}\text{NO}_3$   $[\text{M}+\text{H}]^+$  Calcd: 262, Found: 262  
 chiral-phase HPLC, AD-H column (*i*-PrOH/hexane = 5:95), 254 nm, flow rate = 1 ml/min,  $t_r$  (major) = 10.54 min,  $t_r$  (minor) = 12.98 min.

**(R)-2-[(S)-1-(4-Isopropylphenyl)-2-nitroethyl]cyclohexanone (4b)<sup>4</sup>**

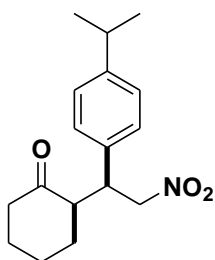

$[\alpha]_{\text{D}}^{23} +16.9$  (*c* 1.00,  $\text{CHCl}_3$ );  $^1\text{H}$  NMR (300 MHz,  $\text{CDCl}_3$ ) 7.16 (d,  $J$  = 8 Hz, 2H), 7.07 (d,  $J$  = 8 Hz, 2H), 4.91 (dd,  $J$  = 12, 4 Hz, 1H), 4.62 (dd,  $J$  = 12, 10 Hz, 1H), 3.76-3.70 (m, 1H), 2.88-2.85 (m, 1H), 2.71-2.65 (m, 1H), 2.49-2.38 (m, 2H), 2.09-2.04 (m, 1H), 1.81-1.58 (m, 5H), 1.22 (d,  $J$  = 7 Hz, 6H);  $^{13}\text{C}$  NMR (75 MHz,  $\text{CDCl}_3$ ) 212.2, 148.2, 134.8, 127.9, 126.9, 78.9, 52.5, 43.4, 33.6, 29.6, 28.5, 24.9, 23.8; IR (KBr) 3853.2, 3357.6, 2925.6, 2345.1, 1706.7, 1552.4, 1378.9, 1089.6  $\text{cm}^{-1}$ , chiral-phase HPLC, AD-H column (*i*-PrOH/hexane = 3:97), 254 nm, flow rate = 1 ml/min,  $t_r$  (major) = 10.19 min,  $t_r$  (minor) = 12.15 min.

**(R)-2-[(S)-1-(4-Fluorophenyl)-2-nitroethyl]cyclohexanone(4c)<sup>2</sup>**

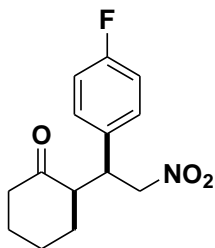

$[\alpha]_{\text{D}}^{23} +29.2$  (*c* 1.00,  $\text{CHCl}_3$ );  $^1\text{H}$  NMR (300 MHz,  $\text{CDCl}_3$ ) 7.14-7.17 (m, 2H), 7.03-6.99

(m, 2H), 4.95 (dd,  $J = 8, 5$  Hz, 1H), 4.59 (dd,  $J = 12, 10$  Hz, 1H), 3.80-3.74 (m, 1H), 2.67-2.65 (m, 1H), 2.49-2.32 (m, 2H), 2.12-2.04 (m, 1H), 1.81-1.56 (m, 4H), 1.26-1.20 (m, 1H);  $^{13}\text{C}$  NMR (75 MHz,  $\text{CDCl}_3$ ) 211.6, 163.3, 160.8, 133.3, 129.7, 115.9, 78.8, 52.5, 43.2, 42.7, 33.1, 28.4, 25.0; IR (KBr) 3266.9, 2923.7, 2279.5, 1708.7, 1550.5, 1376.9, 1093.4, 853.0  $\text{cm}^{-1}$ ; LRMS(FAB+) for  $\text{C}_{14}\text{H}_{16}\text{FNO}_3$   $[\text{M}+\text{H}]^+$  Calcd: 266, Found: 266; chiral-phase HPLC, AS-H column (*i*-PrOH/hexane = 10:90), 254 nm, flow rate = 1 ml/min,  $t_r$  (major) = 17.62 min,  $t_r$  (minor) = 23.07 min.

**(R)-2-[(S)-1-(4-Chlorophenyl)-2-nitroethyl]cyclohexanone (4d)<sup>2</sup>**

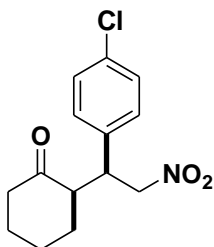

$[\alpha]_{\text{D}}^{23} +24.6$  ( $c$  1.00,  $\text{CHCl}_3$ );  $^1\text{H}$  NMR (300 MHz,  $\text{CDCl}_3$ ) 7.31 (d,  $J = 8$  Hz, 2H), 7.13 (d,  $J = 8$  Hz, 2H), 4.96 (dd,  $J = 12, 4$  Hz, 1H), 4.62 (dd,  $J = 12, 10$  Hz, 1H), 3.78 (dt,  $J = 10, 4$  Hz, 1H), 2.69-2.60 (m, 1H), 2.51-2.34 (m, 2H), 2.15-2.05 (m, 1H), 1.83-1.52 (m, 4H), 1.28-1.23 (m, 1H),  $^{13}\text{C}$  NMR (75 MHz,  $\text{CDCl}_3$ ) 211.6, 136.3, 133.7, 129.6, 129.2, 78.6, 52.4, 43.4, 42.8, 33.2, 28.5, 25.1; IR (KBr) 3252.2, 2897.7, 1721.7, 1555.0, 1087.5  $\text{cm}^{-1}$ ;

chiral-phase HPLC, AS-H column (*i*-PrOH/hexane = 10:90), 254 nm, flow rate = 1 ml/min,  $t_r$  (major) = 14.96 min,  $t_r$  (minor) = 21.15 min.

**(R)-2-[(S)-1-(4-Bromophenyl)-2-nitroethyl]cyclohexanone(4e)<sup>1,2</sup>**

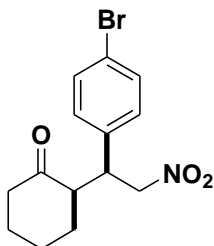

$[\alpha]_{\text{D}}^{25} +16.4$  ( $c$  0.80,  $\text{CHCl}_3$ );  $^1\text{H}$  NMR (300 MHz,  $\text{CDCl}_3$ ) 7.46 (d,  $J$  = 8 Hz, 2H), 7.06 (d,  $J$  = 8 Hz, 2H), 4.93 (dd,  $J$  = 12, 4 Hz, 1H), 4.60 (dd,  $J$  = 12, 10 Hz, 1H), 3.75 (dt,  $J$  = 10, 4 Hz, 1H), 2.69-2.60 (m, 1H), 2.51-2.32 (m, 2H), 2.15-2.05 (m, 1H), 1.85-1.58 (m, 4H), 1.30-1.16 (m, 1H);  $^{13}\text{C}$  NMR (75 MHz,  $\text{CDCl}_3$ ) 211.4, 136.7, 132.0, 129.8, 121.7, 78.4, 52.3, 43.4, 42.7, 33.1, 28.4, 25.0; IR (KBr) 3373.0, 2927.5, 1706.7, 1550.5, 1376.9, 1087.7, 827.3  $\text{cm}^{-1}$ ; LRMS(FAB+) for  $\text{C}_{14}\text{H}_{16}\text{BrNO}_3$   $[\text{M}+\text{H}]^+$  Calcd: 326, Found: 326; chiral-phase HPLC, AS-H column (*i*-PrOH/hexane = 10:90), 254 nm, flow rate = 0.5 ml/min,  $t_{\text{r}}$  (major) = 20.22 min,  $t_{\text{r}}$  (minor) = 29.08 min.

**(R)-2-[(S)-1-(3-Chlorophenyl)-2-nitroethyl]cyclohexanone(4f)<sup>2</sup>**

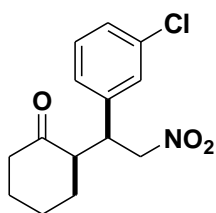

$[\alpha]_{\text{D}}^{23} +17.2$  ( $c$  1.00,  $\text{CHCl}_3$ );  $^1\text{H}$  NMR (300 MHz,  $\text{CDCl}_3$ ) 7.26-7.24 (m, 2H), 7.17 (s, 1H), 7.09-7.06 (m, 1H), 4.94 (dd,  $J$  = 13, 4 Hz, 1H), 4.61 (d,  $J$  = 13, 10 Hz, 1H), 3.75 (dt,  $J$  = 10, 4 Hz, 1H), 2.69-2.64 (m, 1H), 2.62-2.34 (m, 2H), 2.13-2.07 (m, 1H), 1.82-1.57 (m, 4H), 1.23-1.19 (m, 1H);  $^{13}\text{C}$  NMR (75 MHz,  $\text{CDCl}_3$ ) 211.4, 139.8, 134.7, 130.1, 128.2, 128.0, 126.4, 78.3, 52.2, 43.6, 42.7, 33.2, 28.4, 25.0; IR (KBr) 3284.3, 2929.4, 2362.4, 1706.7, 1552.4, 1378.9, 1130.1, 794.5  $\text{cm}^{-1}$ ; chiral-phase HPLC, AS-H column (*i*-PrOH/hexane = 10:90), 254 nm, flow rate = 1 ml/min,  $t_{\text{r}}$  (major) = 16.09 min,  $t_{\text{r}}$  (minor) = 22.16 min.

**(R)-2-[(R)-1-(Furan-2-yl)-2-nitroethyl]cyclohexanone(4g)<sup>1</sup>**

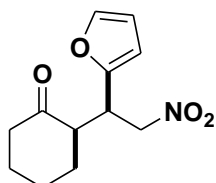

$[\alpha]_{\text{D}}^{23} +12.4$  ( $c$  2.00,  $\text{CHCl}_3$ );  $^1\text{H}$  NMR (300 MHz,  $\text{CDCl}_3$ ) 7.35 (m, 1H), 6.28 (dd,  $J$  = 3, 2 Hz, 1H), 6.18 (d,  $J$  = 3 Hz, 1H), 4.83-4.63 (m, 2H), 3.97 (dt,  $J$  = 10, 5 Hz, 1H), 2.80-

2.71 (m, 1H), 2.50-2.31 (m, 2H), 2.14-2.04 (m, 1H), 1.88-1.56 (m, 4H), 1.35-1.21 (m, 1H);  $^{13}\text{C}$  NMR (75 MHz,  $\text{CDCl}_3$ ) 211.0, 150.9, 142.3, 110.3, 109.0, 77.1, 51.1, 42.6, 37.6, 32.5, 28.2, 25.1; IR (KBr) 3392., 2941.0, 1706.7, 1552.4, 1430.9, 1376.9, 1130.1, 1014.4, 916.0, 740.5  $\text{cm}^{-1}$ ; HRMS(FAB+) for  $\text{C}_{12}\text{H}_{15}\text{NO}_4$   $[\text{M}+\text{H}]^+$  Calcd: 238.1079, Found: 238.1080; chiral-phase HPLC, AD-H column (*i*-PrOH/hexane = 5:95), 254 nm, flow rate = 0.7 ml/min,  $t_r$  (minor) = 26.50 min,  $t_r$  (major) = 33.60 min.

**(R)-2-[(S)-1-Thien-2-yl-2-nitroethyl]cyclohexanone(4h)<sup>1</sup>**

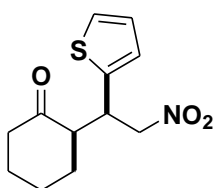

$[\alpha]_{\text{D}}^{23} +20.1$  (c 1.00,  $\text{CHCl}_3$ );  $^1\text{H}$  NMR (300 MHz,  $\text{CDCl}_3$ ) 7.22-7.21 (m, 1H), 6.93 (dd,  $J$  = 5, 3 Hz, 1H), 6.88-6.87 (m, 1H), 4.89 (dd,  $J$  = 12, 5 Hz, 1H), 4.65 (dd,  $J$  = 12, 9 Hz, 1H), 4.13 (dt,  $J$  = 9, 5 Hz, 1H), 2.73-2.64 (m, 1H), 2.50-2.32 (m, 2H), 2.14-2.06 (m, 1H), 1.95-1.82 (m, 2H), 1.69-1.58 (m, 2H), 1.39-1.29 (m, 1H);  $^{13}\text{C}$  NMR (75 MHz,  $\text{CDCl}_3$ ) 211.1, 140.4, 126.8, 126.5, 124.9, 79.1, 53.2, 42.5, 39.3, 32.7, 28.2, 25.0; IR (KBr) 3392.3, 3110.7, 2939.1, 2285.3, 1704.8, 1552.4, 1378.9, 1253.5, 1128.2, 850.4, 705.8  $\text{cm}^{-1}$ ; HRMS(FAB+) for  $\text{C}_{12}\text{H}_{15}\text{NO}_3\text{S}$   $[\text{M}+\text{H}]^+$  Calcd: 254.0851, Found: 254.0853; chiral-phase HPLC, AS-H column (*i*-PrOH/hexane = 4:96), 254 nm, flow rate = 0.5 ml/min,  $t_r$  (minor) = 29.95 min,  $t_r$  (major) = 35.16 min.

**(R)-2-[(S)-1-Naphthalen-2-yl-2-nitroethyl]cyclohexanone(4i)<sup>5</sup>**

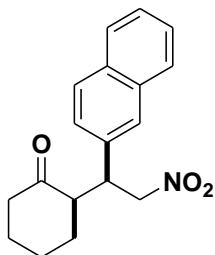

$[\alpha]_{\text{D}}^{23} +15.6$  (c 1.00,  $\text{CHCl}_3$ );  $^1\text{H}$  NMR (300 MHz,  $\text{CDCl}_3$ ) 7.84-7.78 (m, 3H), 7.64 (s, 1H), 7.50-7.46 (m, 2H), 7.29 (dd,  $J$  = 11, 2 Hz, 1H), 5.03 (dd,  $J$  = 12, 4 Hz, 1H), 4.74

(dd,  $J = 12, 10$  Hz, 1H), 3.95 (dt,  $J = 10, 4$  Hz, 1H), 2.83-2.74 (m, 1H), 2.54-2.36 (m, 2H), 2.11-2.04 (m, 1H), 1.79-1.62 (m, 4H), 1.32-1.29 (m, 1H);  $^{13}\text{C}$  NMR (75 MHz,  $\text{CDCl}_3$ ) 211.8, 135.0, 133.2, 128.8, 127.7, 126.4, 126.1, 125.1, 78.8, 52.4, 44.0, 42.7, 33.3, 28.5, 25.0; IR (KBr) 3376.9, 2923.7, 1700.9, 1550.5, 1382.7, 1091.5, 825.4  $\text{cm}^{-1}$ ; LRMS(FAB+) for  $\text{C}_{18}\text{H}_{19}\text{NO}_3$   $[\text{M}]^+$  Calcd: 297, Found: 297; chiral-phase HPLC, AS-H column (*i*-PrOH/hexane = 50:50), 254 nm, flow rate = 0.7 ml/min,  $t_r$  (major) = 9.14 min,  $t_r$  (minor) = 13.12 min.

**(R)-2-[(S)-1-(4-Methoxyphenyl)-2-nitroethyl]cyclohexanone(4j)<sup>5</sup>**

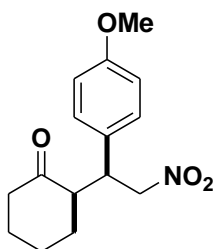

$[\alpha]_{\text{D}}^{23} +10.8$  ( $c$  1.00,  $\text{CHCl}_3$ );  $^1\text{H}$  NMR (300 MHz,  $\text{CDCl}_3$ ) 7.08 (d,  $J = 9$  Hz, 2H), 6.85 (d,  $J = 9$  Hz, 2H), 4.91 (dd,  $J = 12, 4$  Hz, 1H), 4.58 (dd,  $J = 12, 10$  Hz, 1H), 3.78 (s, 3H), 3.71 (dt,  $J = 10, 4$  Hz, 1H), 2.69-2.60 (m, 1H), 2.52-2.32 (m, 2H), 2.13-2.03 (m, 1H), 1.83-1.51 (m, 4H), 1.30-1.16 (m, 1H);  $^{13}\text{C}$  NMR (75 MHz,  $\text{CDCl}_3$ ) 212.2, 158.09, 129.4, 129.1, 114.2, 79.0, 55.1, 52.6, 43.1, 42.7, 33.1, 28.5, 24.9; IR (KBr) 3380.7, 2950.7, 2360.5, 1700.9, 1552.4, 1388.5, 1255.4, 1089.6, 831.2  $\text{cm}^{-1}$ ; HRMS(FAB+) for  $\text{C}_{15}\text{H}_{19}\text{NO}_4$   $[\text{M}]^+$  Calcd: 278.1392, Found: 278.1390; chiral-phase HPLC, AD-H column (*i*-PrOH/hexane = 20:80), 254 nm, flow rate = 0.5 ml/min,  $t_r$  (major) = 18.59 min,  $t_r$  (minor) = 23.72 min.

**(R)-2-[(S)-1-(2-Methoxyphenyl)-2-nitroethyl]cyclohexanone(4k)<sup>2</sup>**

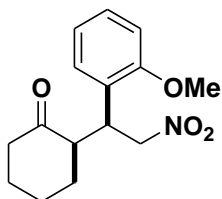

$[\alpha]_{\text{D}}^{23} +7.2$  (*c* 0.10,  $\text{CHCl}_3$ );  $^1\text{H}$  NMR (300 MHz,  $\text{CDCl}_3$ ) 7.28-7.22 (m, 1H), 7.09 (dd,  $J = 7, 2$  Hz, 1H), 6.91-6.86 (m 2H), 4.84 (dd,  $J = 10, 5$  Hz, 1H), 4.00-3.90 (m, 1H), 3.84 (s, 3H), 2.99 (dt,  $J = 10, 5$  Hz, 1H), 2.50-2.34 (m, 2H), 2.10-2.04 (m, 1H), 1.80-1.54 (m, 4H), 1.12-1.18 (m, 1H);  $^{13}\text{C}$  NMR (75 MHz,  $\text{CDCl}_3$ ) 212.5, 157.5, 130.9, 128.8, 125.2, 120.8, 110.9, 76.6, 55.3, 50.5, 42.6, 33.2, 28.5, 25.1; IR (KBr) 3293.9, 2935.2, 2345.1, 1706.7, 1550.5, 1378.9, 1245.8, 1122.4, 755.9  $\text{cm}^{-1}$ ; HRMS(FAB+) for  $\text{C}_{15}\text{H}_{19}\text{NO}_4$   $[\text{M}+\text{H}]^+$  Calcd: 278.1392, Found: 278.1390; chiral-phase HPLC, AS-H column (*i*-PrOH/hexane = 10:90), 254 nm, flow rate = 0.5 ml/min,  $t_{\text{r}}$  (major) = 26.35 min,  $t_{\text{r}}$  (minor) = 36.10 min.

**(R)-2-[(S)-2-Nitro-1-(2-nitrophenyl)ethyl]cyclohexanone(4l)<sup>5</sup>**

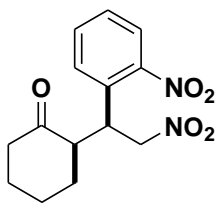

$[\alpha]_{\text{D}}^{23} +9.8$  (*c* 0.80,  $\text{CHCl}_3$ );  $^1\text{H}$  NMR (300 MHz,  $\text{CDCl}_3$ ) 7.83 (dd,  $J = 8, 2$  Hz, 1H), 7.64-7.58 (m, 1H), 7.49-7.41 (m, 2H), 4.98-4.83 (m, 2H), 4.38 (dt,  $J = 9, 4$  Hz, 1H), 2.98-2.87 (m, 1H), 2.50-2.34 (m, 2H), 2.17-2.07 (m, 1H), 1.85-1.61 (m, 5H);  $^{13}\text{C}$  NMR (75 MHz,  $\text{CDCl}_3$ ) 211.1, 150.7, 133.1, 132.8, 129.1, 128.6, 124.9, 77.6, 52.1, 42.8, 38.6, 33.2, 28.3, 25.3; IR (film) 2944, 2864, 1707, 1552, 1527, 1358, 855, 781  $\text{cm}^{-1}$ ; HRMS(FAB+) for  $\text{C}_{14}\text{H}_{16}\text{N}_2\text{O}_5$   $[\text{M}+\text{H}]^+$  Calcd: 293.1137, Found: 293.1141; chiral-phase HPLC, AD-H column (*i*-PrOH/hexane = 15:85), 254 nm, flow rate = 1 ml/min,  $t_{\text{r}}$  (major) = 14.45 min,  $t_{\text{r}}$  (minor) = 22.22 min.

**(3R,3aS)-3-(4-Methoxyphenyl)-3,3a,4,5,6,7-hexahydro-2H-indole-1-Oxide(5a)<sup>8</sup>**

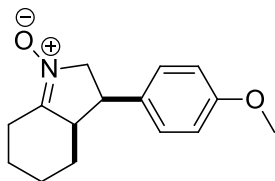

$^1\text{H}$  NMR (500MHz,  $\text{CDCl}_3$ ): 7.16 (d, 2H,  $J = 8.7$ , ArH), 6.89 (d, 2H,  $J = 8.7$ , ArH),

4.27-4.24 (br m, 1H, NCH<sub>2</sub>), 4.15-4.10 (br m, 1H, NCH<sub>2</sub>), 3.81 (s, 3H, OCH<sub>3</sub>), 3.25-3.15 (m, 2H, ArCH, NCCH<sub>2</sub>), 2.8-2.7 (ArCHCH), 2.12-1.84 (m, 3H, CH<sub>2</sub>), 1.85 (br d, 1H, *J* = 12.8, CH<sub>2</sub>), 1.45-1.18 (m, 4H, CH<sub>2</sub>); <sup>13</sup>C NMR (125 MHz, CDCl<sub>3</sub>): δ 158.9, 148.6, 131.7, 128.3, 114.4, 68.4, 55.3, 50.6, 45.3, 32.3, 24.3, 23.8, 23.5; LRMS(ESI<sup>+</sup>): *m/z* 246.1 (M+H);

## 2. Copy of HPLC, NMR and MASS Spectra

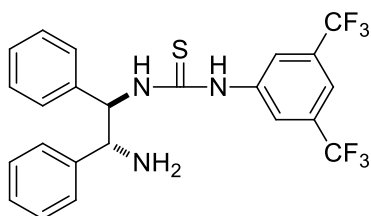

**1a**

### <sup>1</sup>H NMR

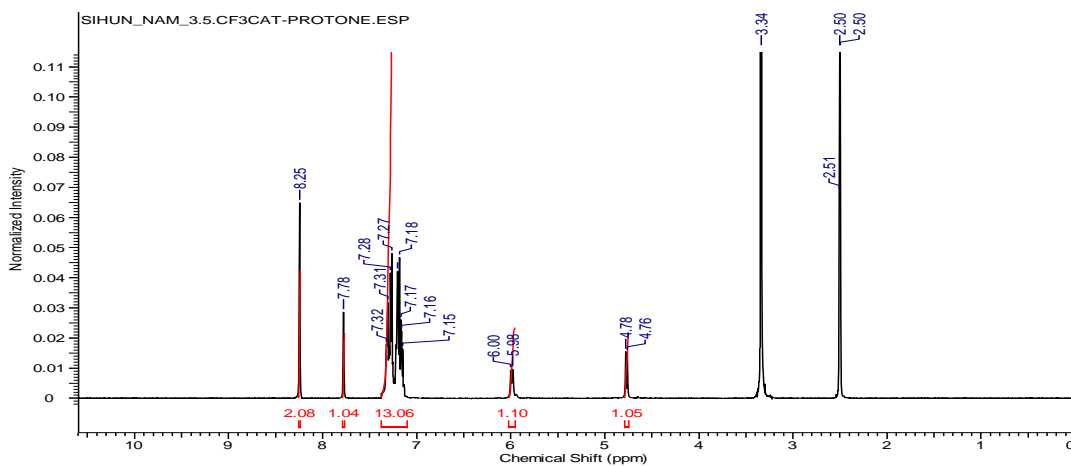

### <sup>13</sup>C NMR

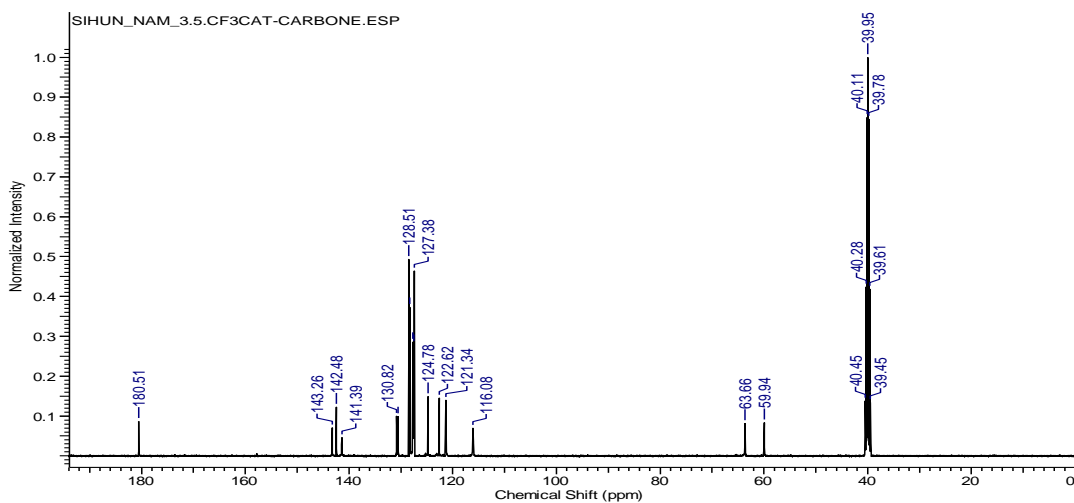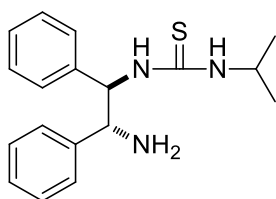

**1b**

**<sup>1</sup>H NMR**

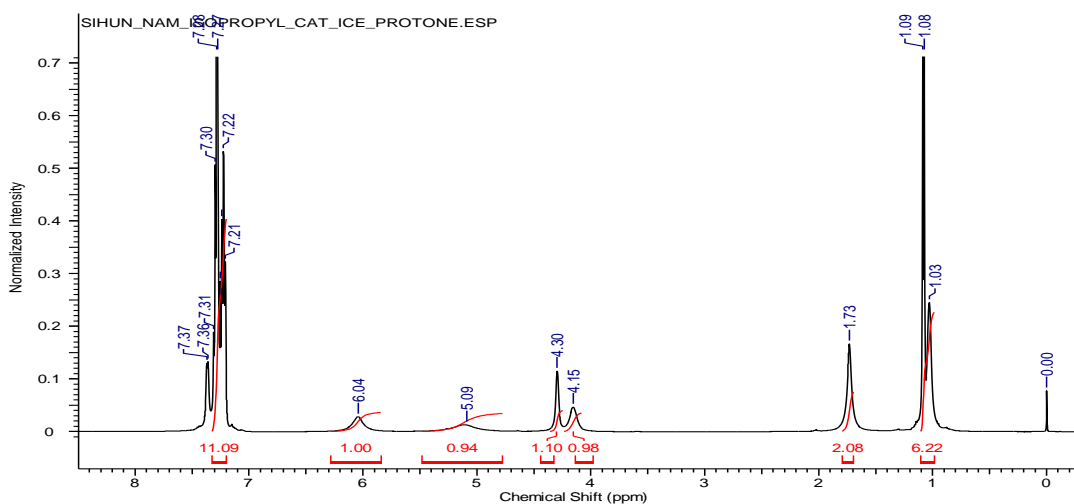

**<sup>13</sup>C NMR**

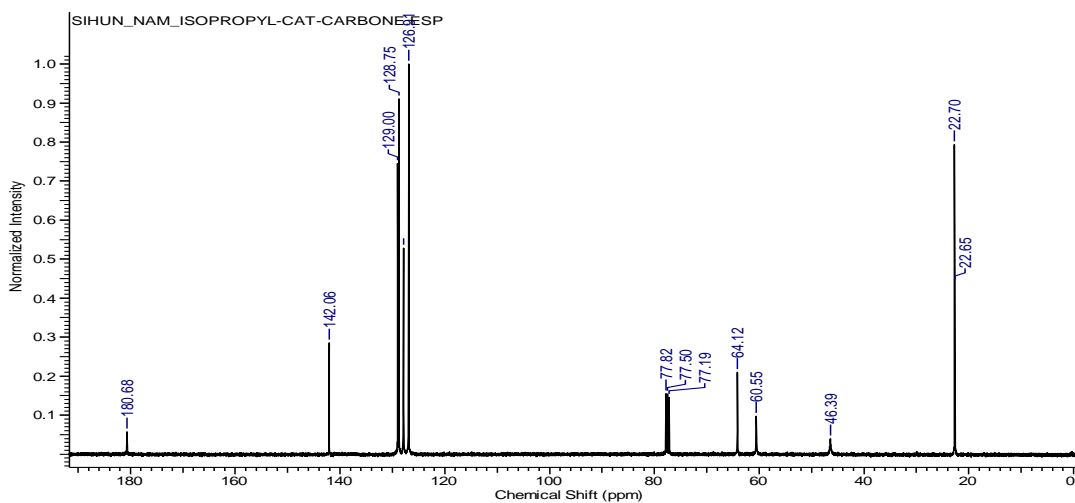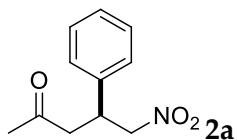

LC data

Racemic

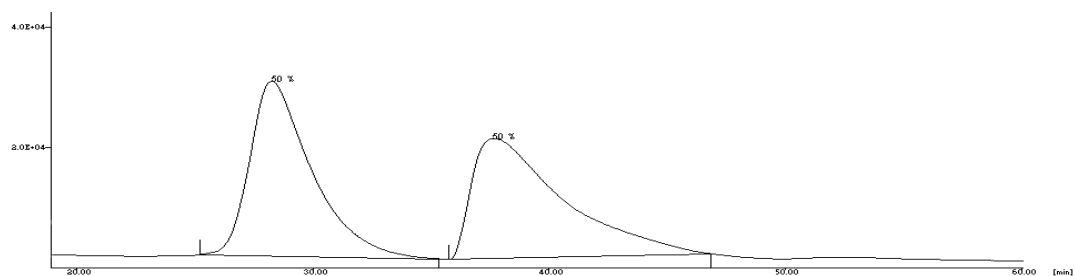

| # | Name | RT     | Area[uV.Sec] | Quantity |
|---|------|--------|--------------|----------|
| 1 |      | 28.258 | 5183575.750  | 0.000    |
| 2 |      | 37.650 | 5252568.500  | 0.000    |

Total Area of Peak = 10436144.250 [uV.Sec]

Asymmetric-Table 1-1

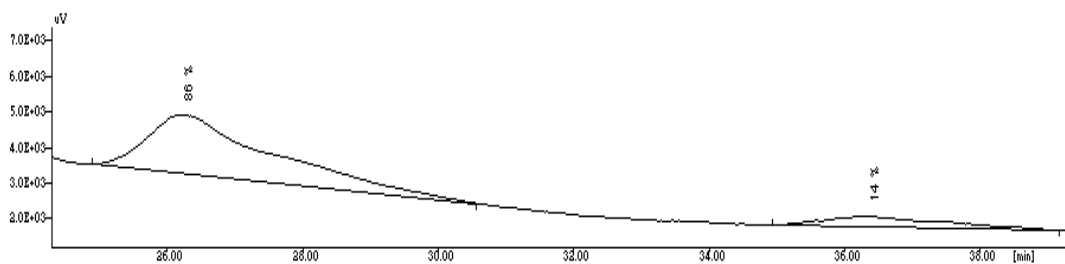

| # | Name | RT     | Area[uV.Sec] | Quantity |
|---|------|--------|--------------|----------|
| 1 |      | 26.217 | 211984.571   | 0.000    |
| 2 |      | 36.350 | 35605.786    | 0.000    |

Total Area of Peak = 247590.358 [uV.Sec]

Asymmetric-Table 1-2

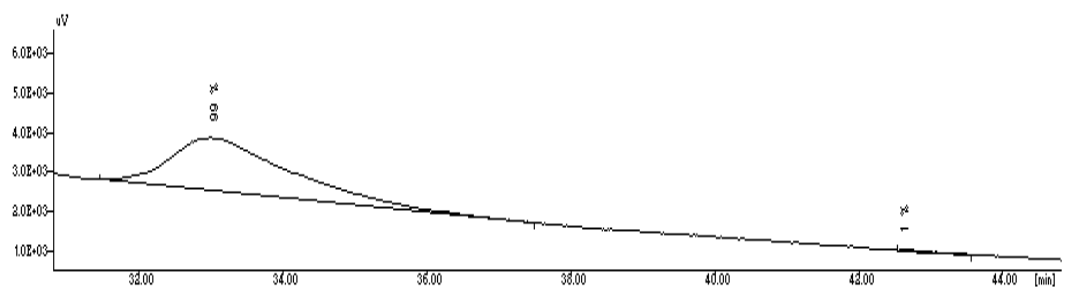

| # | Name | RT     | Area[uV.Sec] | Quantity |
|---|------|--------|--------------|----------|
| 1 |      | 32.967 | 156709.400   | 0.000    |
| 2 |      | 42.558 | 1078.585     | 0.000    |

Total Area of Peak = 157787.985 [uV.Sec]

Asymmetric-Table 1-3

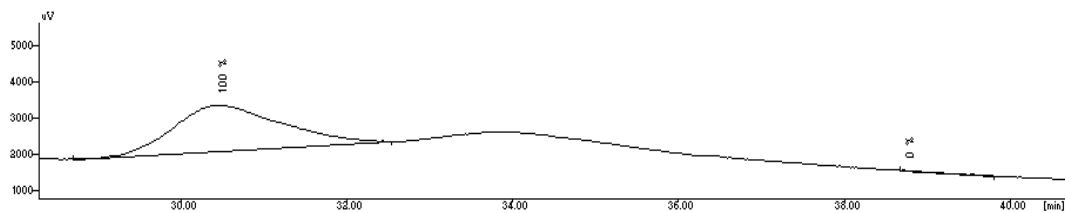

| # | Name | RT     | Area[uV.Sec] | Quantity |
|---|------|--------|--------------|----------|
| 1 |      | 30.425 | 112143.125   | 0.000    |
| 2 |      | 38.708 | 225.803      | 0.000    |

Total Area of Peak = 112368.928 [uV.Sec]

Asymmetric-Table 1-4

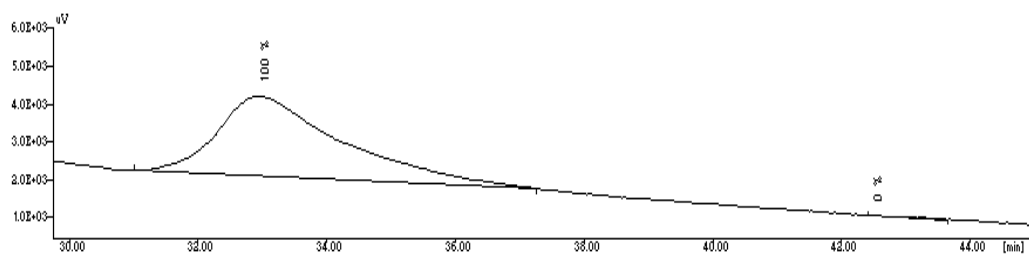

| # | Name | RT     | Area[uV.Sec] | Quantity |
|---|------|--------|--------------|----------|
| 1 |      | 32.942 | 281123.989   | 0.000    |
| 2 |      | 42.458 | 664.608      | 0.000    |

Total Area of Peak = 281788.597 [uV.Sec]

## <sup>1</sup>H NMR

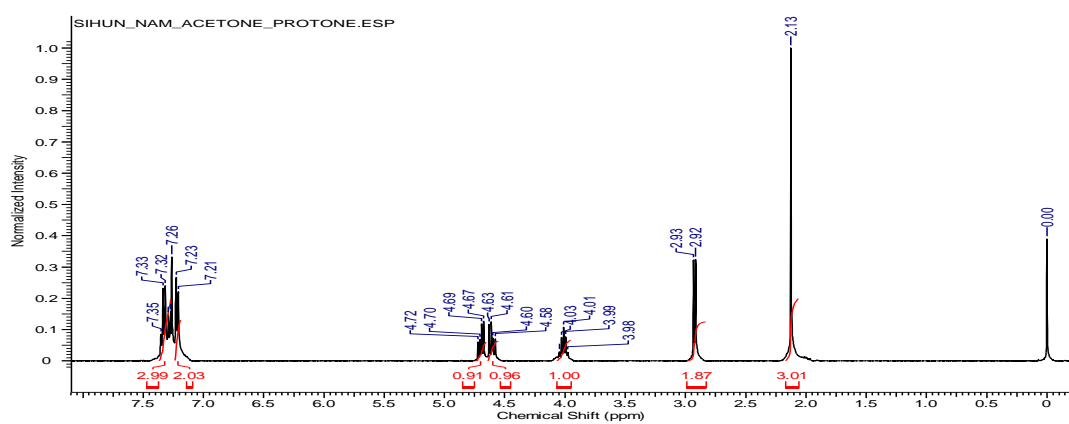

## <sup>13</sup>C NMR

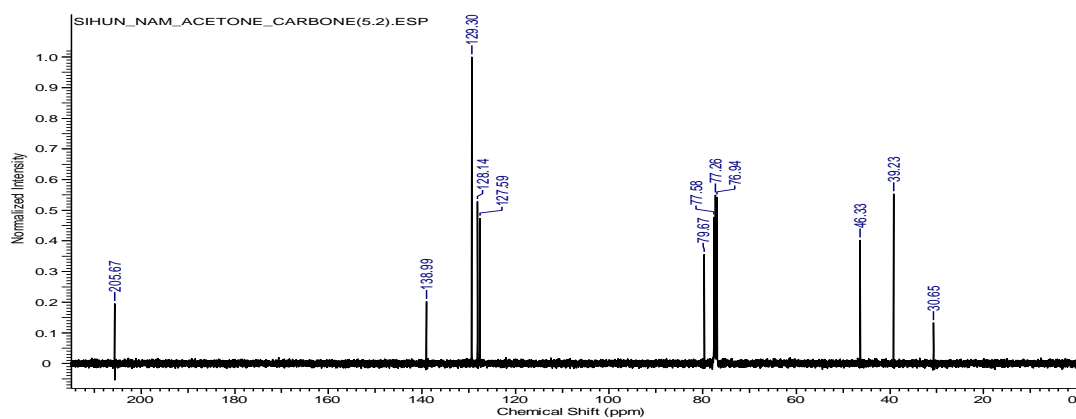

## Mass

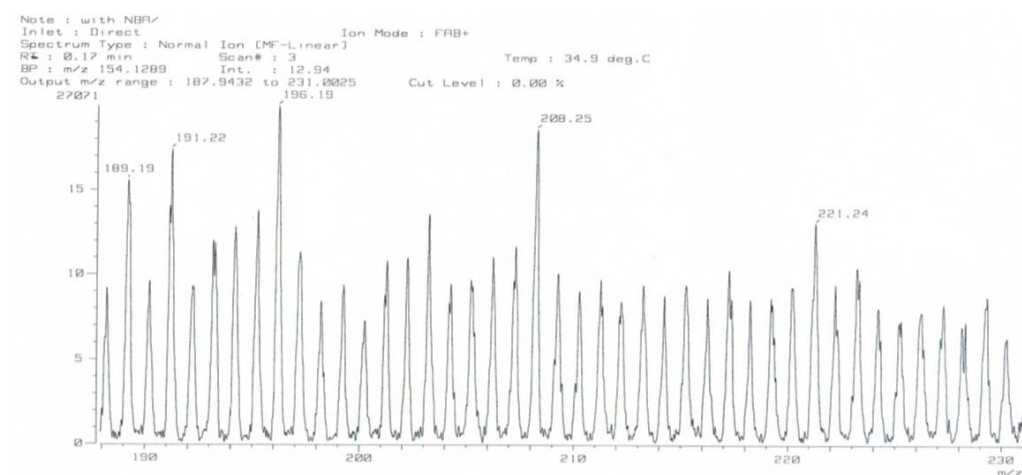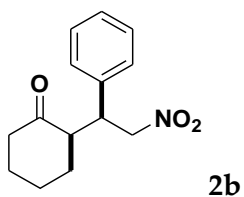

LC data

racemic

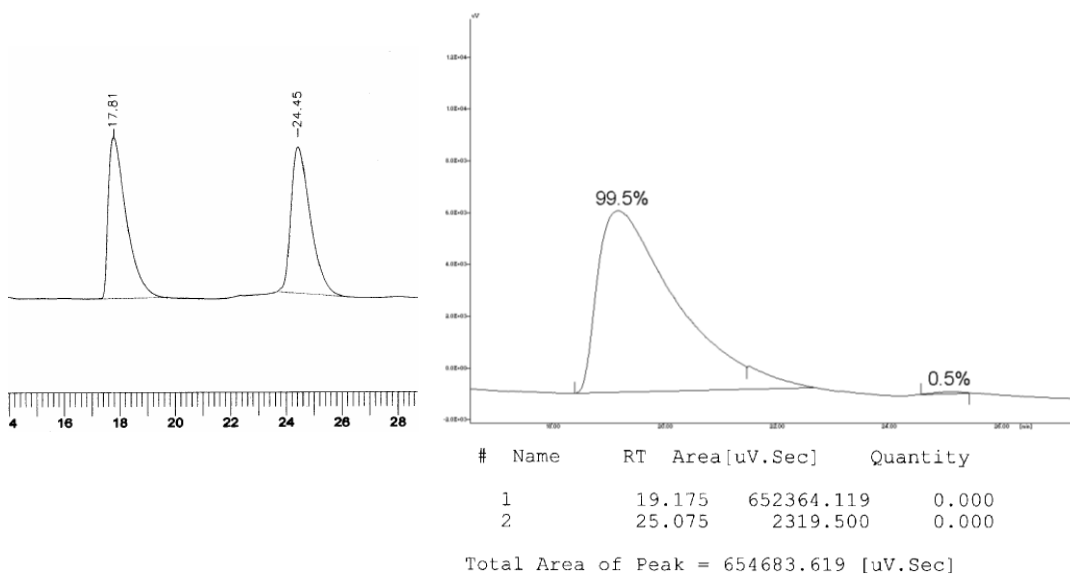

<sup>1</sup>H NMR

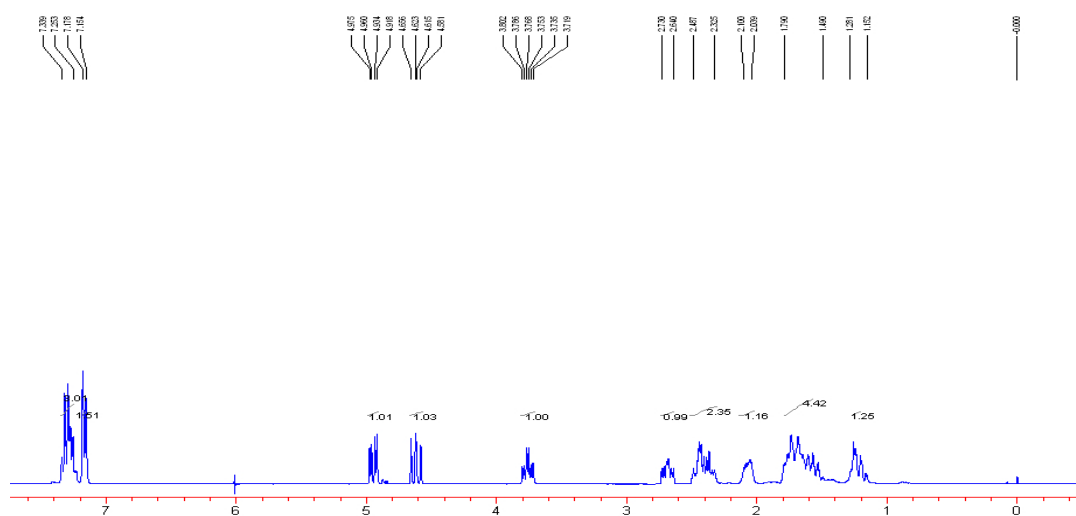

## $^{13}\text{C}$ NMR

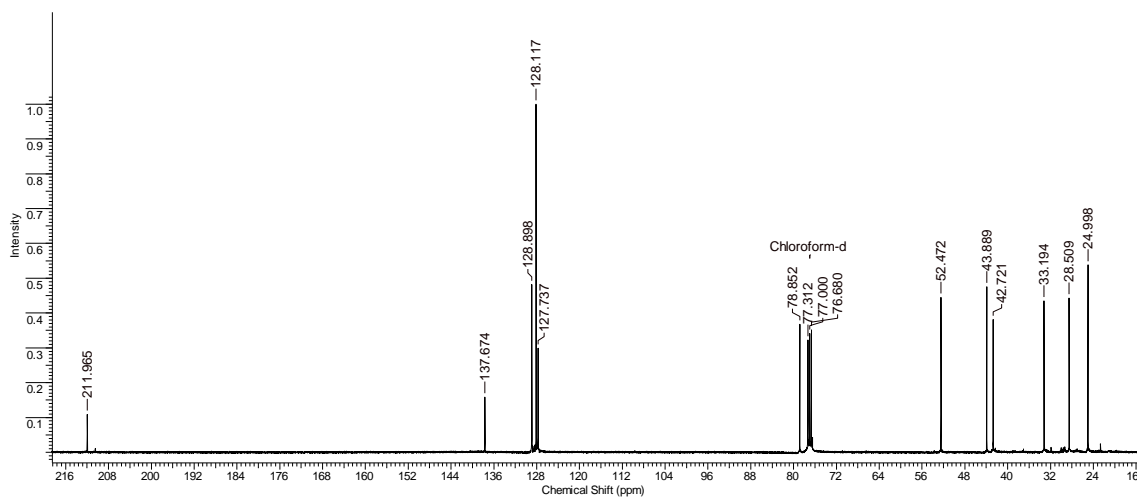

## Mass

Inlet : Direct Ion Mode : FRI+  
Spectrum Type : Normal Ion [MF-Linear]  
RT : 0.40 min Scan# : 4  
BP : m/z 135.0595 Int. : 20.07  
Output m/z range : 231.3474 to 266.5590 Cut Level : 0.00 %

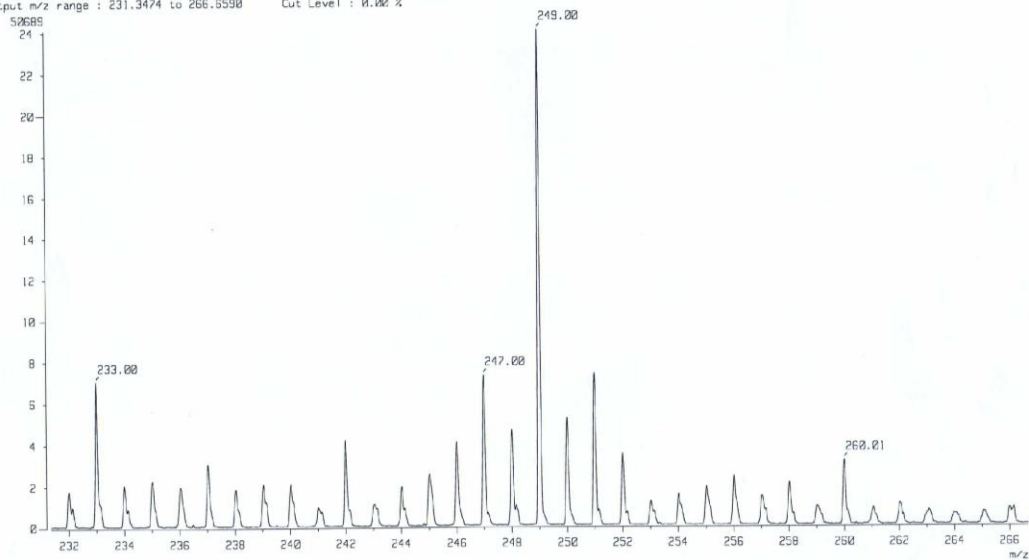

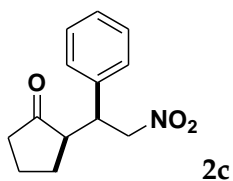

LC data

racemic

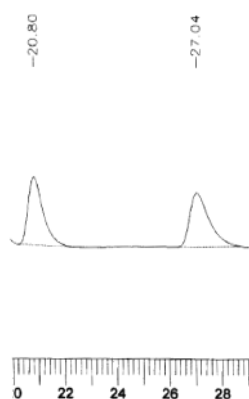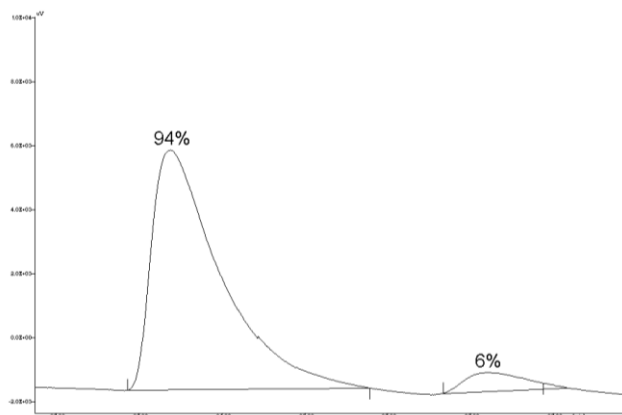

| # | Name | RT     | Area[uV.Sec] | Quantity |
|---|------|--------|--------------|----------|
| 1 |      | 22.742 | 861745.000   | 0.000    |
| 2 |      | 30.475 | 55642.856    | 0.000    |

Total Area of Peak = 917387.856 [uV.Sec]

<sup>1</sup>H NMR

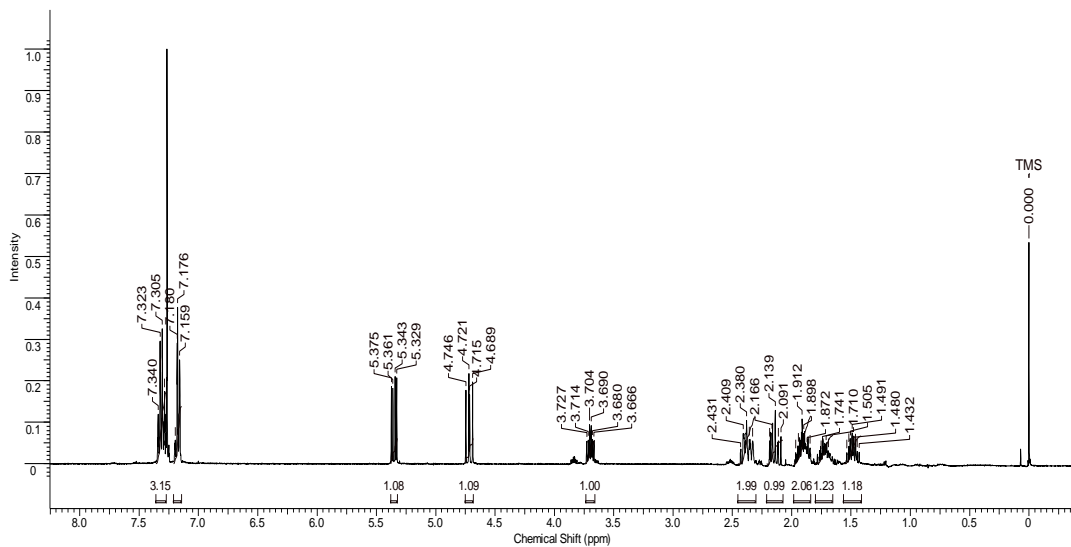

# <sup>13</sup>C NMR

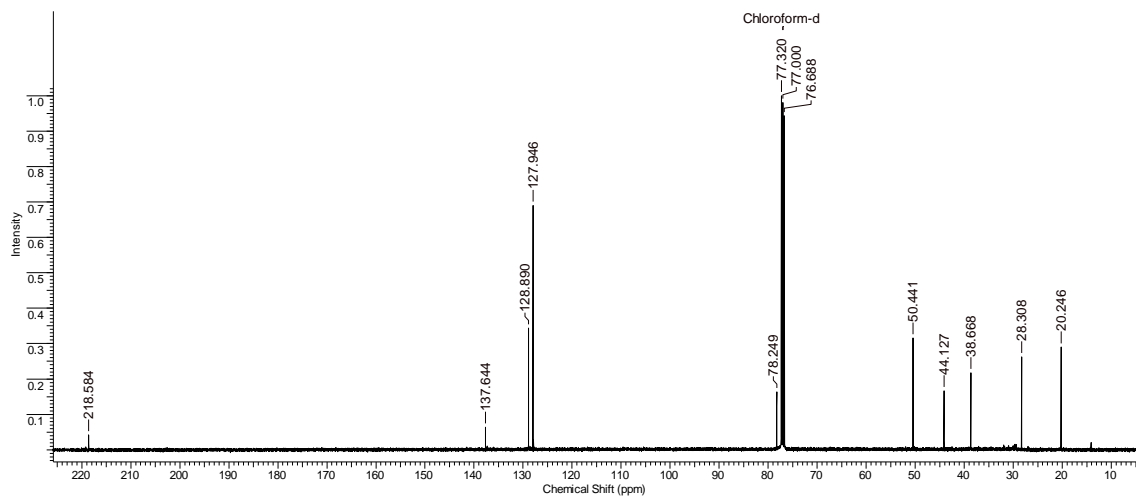

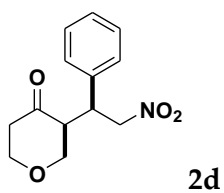

LC data

racemic

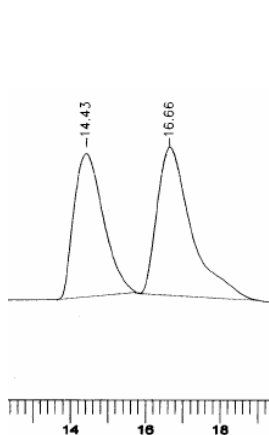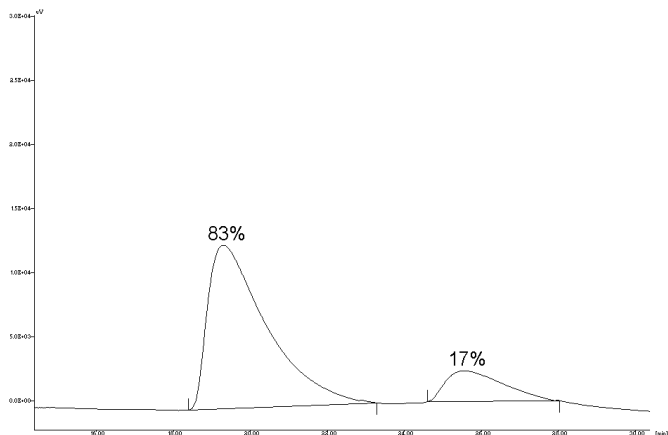

| # | Name | RT     | Area[uV.Sec] | Quantity |
|---|------|--------|--------------|----------|
| 1 |      | 19.292 | 1416102.812  | 0.000    |
| 2 |      | 25.533 | 384599.179   | 0.000    |

Total Area of Peak = 1800701.991 [uV.Sec]

<sup>1</sup>H NMR

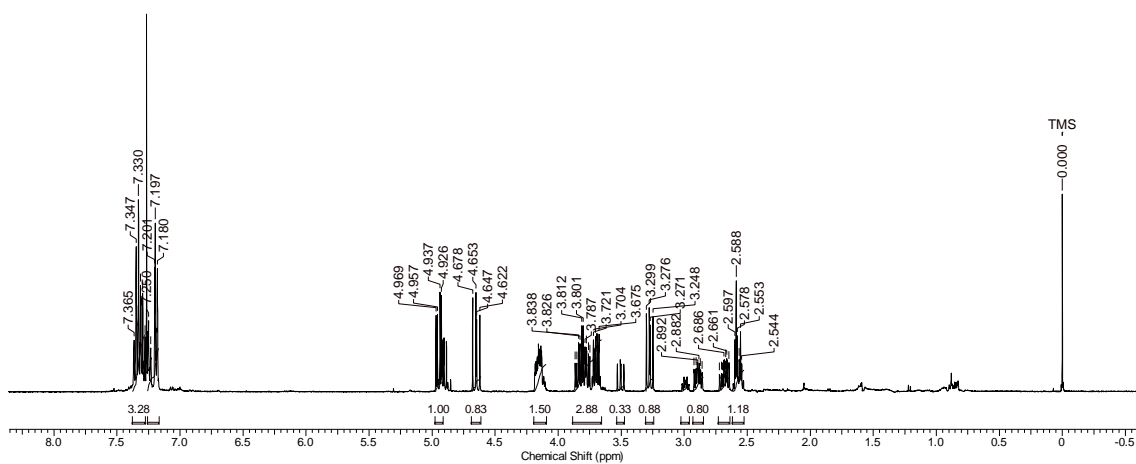

# $^{13}\text{C}$ NMR

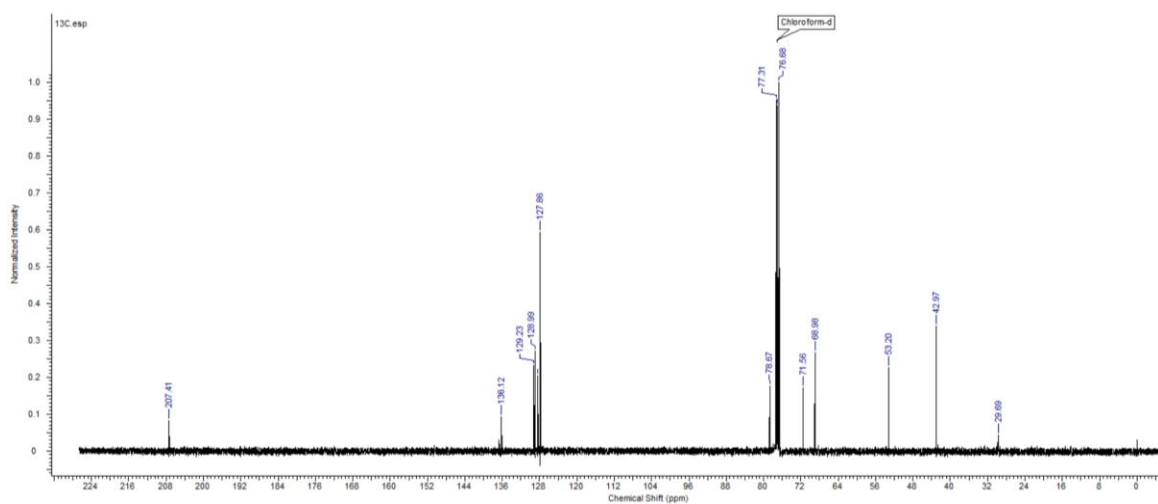

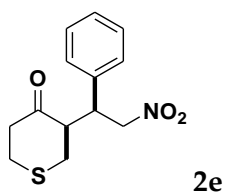

LC data

racemic

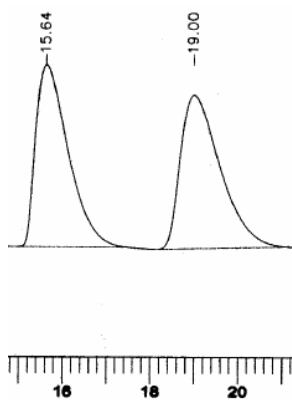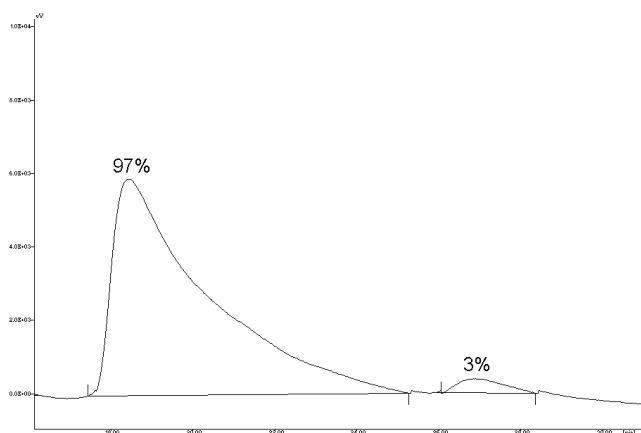

| # | Name | RT     | Area[uV.Sec] | Quantity |
|---|------|--------|--------------|----------|
| 1 |      | 18.408 | 944894.000   | 0.000    |
| 2 |      | 26.842 | 29752.344    | 0.000    |

Total Area of Peak = 974646.344 [uV.Sec]

<sup>1</sup>H NMR

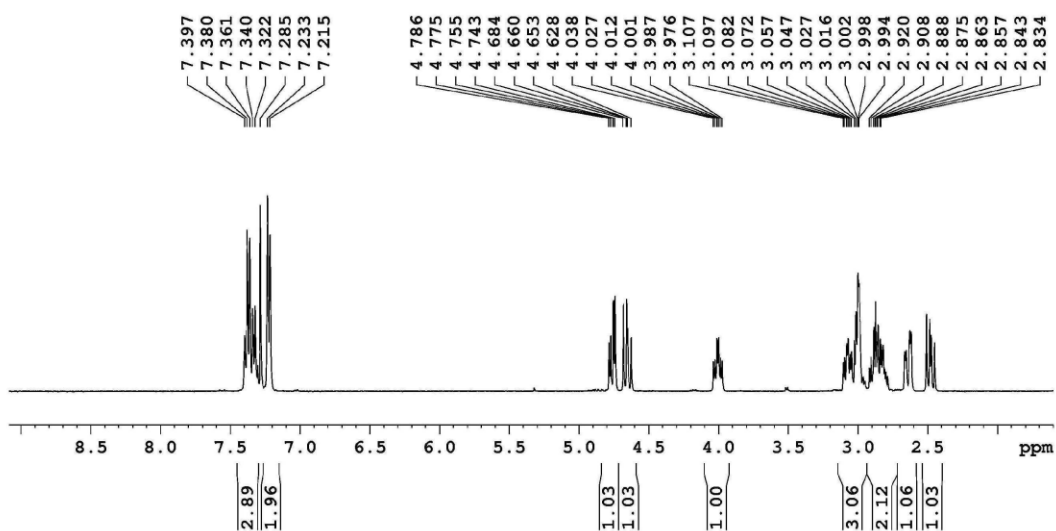

<sup>13</sup>C NMR

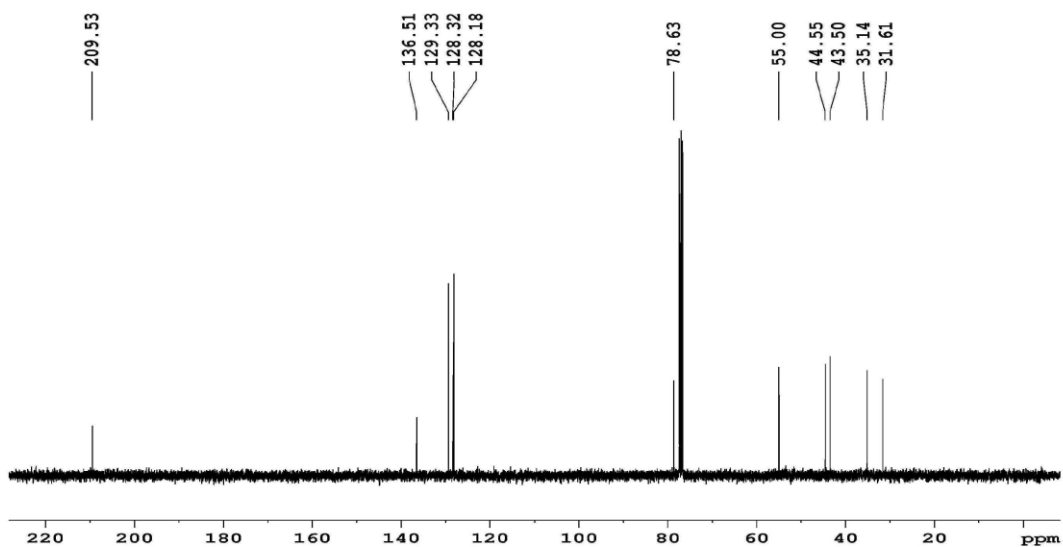

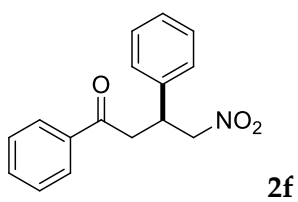

LC data

racemic

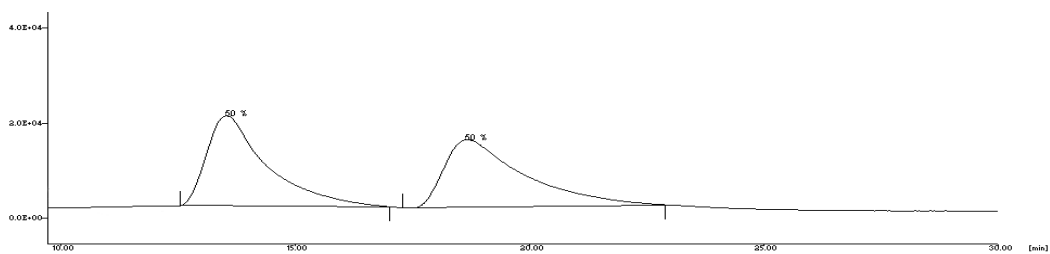

| #                                         | Name | RT     | Area[uV.Sec] | Quantity |
|-------------------------------------------|------|--------|--------------|----------|
| 1                                         |      | 13.533 | 1654427.500  | 0.000    |
| 2                                         |      | 18.650 | 1636835.605  | 0.000    |
| Total Area of Peak = 3291263.105 [uV.Sec] |      |        |              |          |

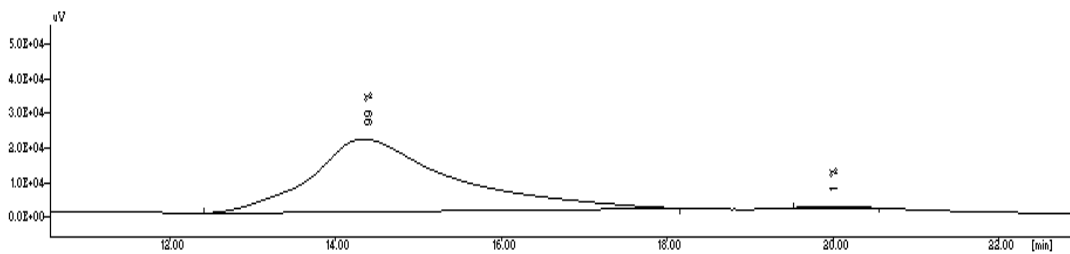

| # | Name | RT     | Area[uV.Sec] | Quantity |
|---|------|--------|--------------|----------|
| 1 |      | 14.317 | 2519443.881  | 0.000    |
| 2 |      | 19.933 | 15846.500    | 0.000    |

Total Area of Peak = 2535290.381 [uV.Sec]

## <sup>1</sup>H NMR

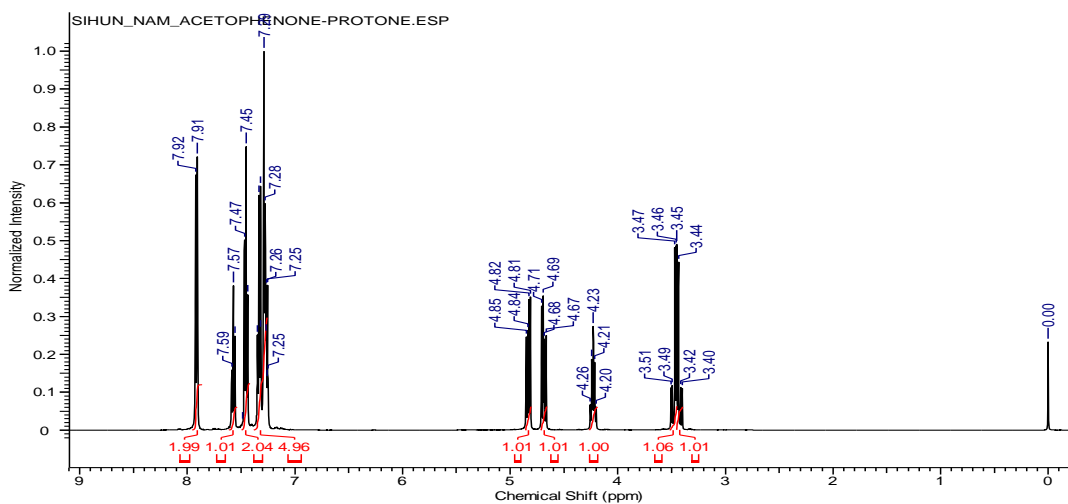

## <sup>13</sup>C NMR

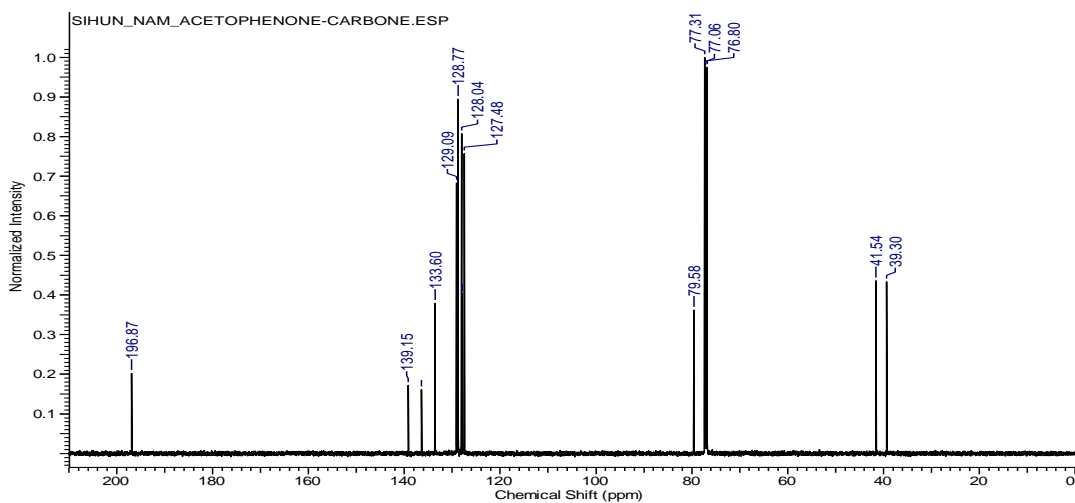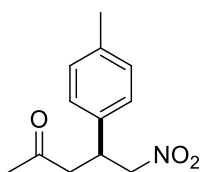

**3a**

LC data

Racemic

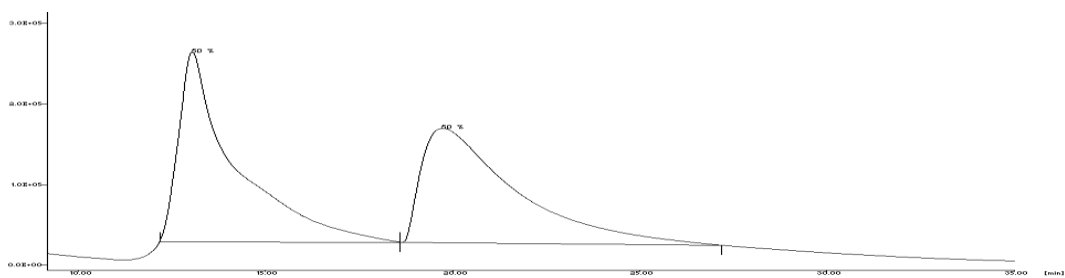

| # | Name | RT     | Area[uV.Sec] | Quantity |
|---|------|--------|--------------|----------|
| 1 |      | 13.025 | 24260518.000 | 0.000    |
| 2 |      | 19.725 | 24470144.676 | 0.000    |

Total Area of Peak = 48730662.676 [uV.Sec]

Asymmetric

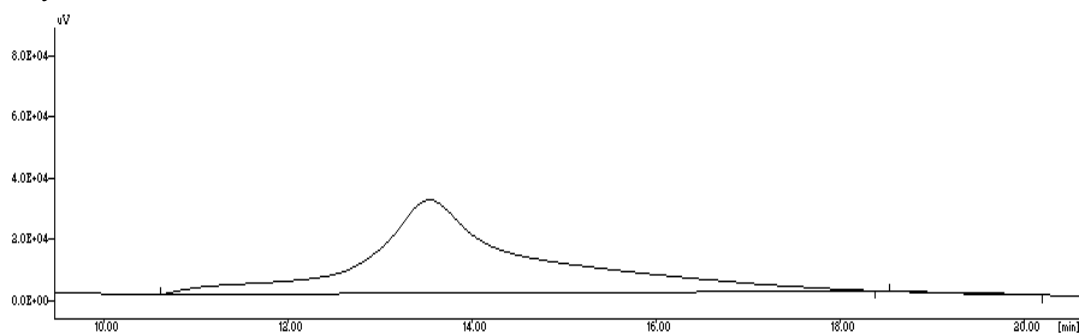

| # | Name | RT     | Area[uV.Sec] | Quantity |
|---|------|--------|--------------|----------|
| 1 |      | 13.533 | 3641381.500  | 0.000    |
| 2 |      | 19.967 | 8063.435     | 0.000    |

Total Area of Peak = 3649444.935 [uV.Sec]

<sup>1</sup>H NMR

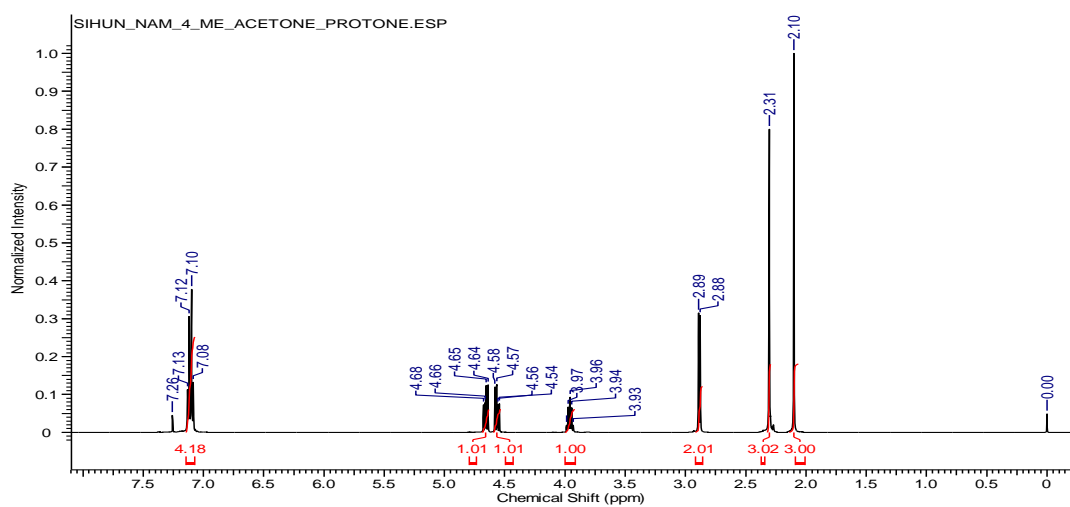

<sup>13</sup>C NMR

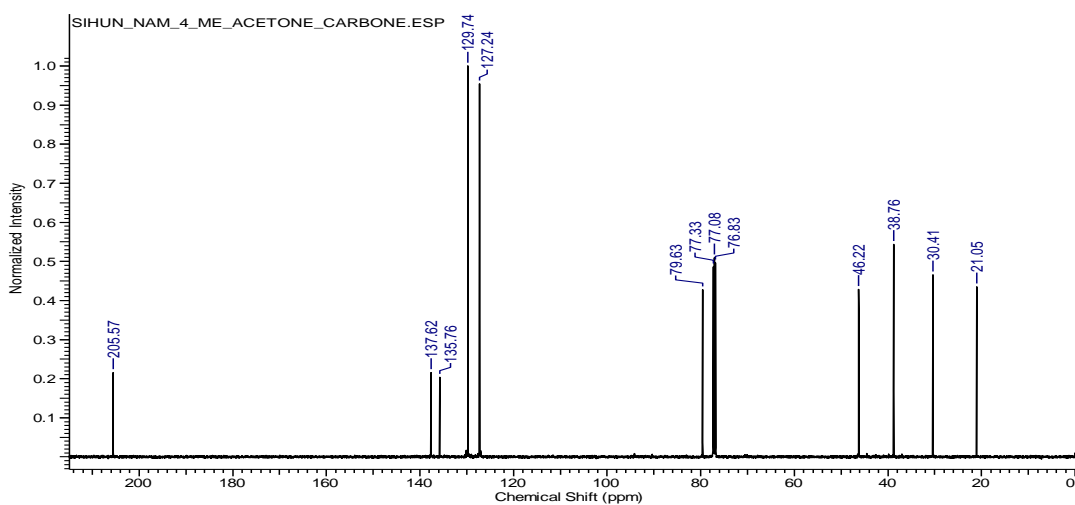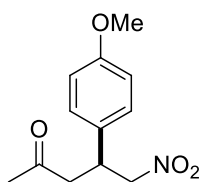

**3b**

LC data

Racemic

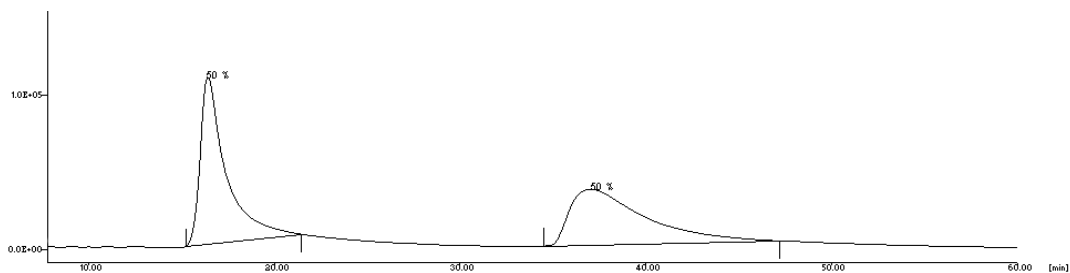

| # | Name | RT     | Area[uV.Sec] | Quantity |
|---|------|--------|--------------|----------|
| 1 |      | 16.408 | 10185777.000 | 0.000    |
| 2 |      | 37.042 | 10015080.836 | 0.000    |

Total Area of Peak = 20200857.836 [uV.Sec]

## Asymmetric

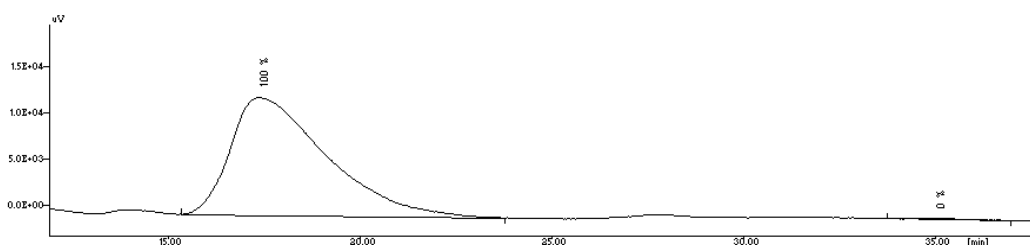

| # | Name | RT     | Area[uV.Sec] | Quantity |
|---|------|--------|--------------|----------|
| 1 |      | 16.225 | 2571746.500  | 0.000    |
| 2 |      | 37.917 | 240342.093   | 0.000    |

Total Area of Peak = 2812088.593 [uV.Sec]

## $^1\text{H}$ NMR

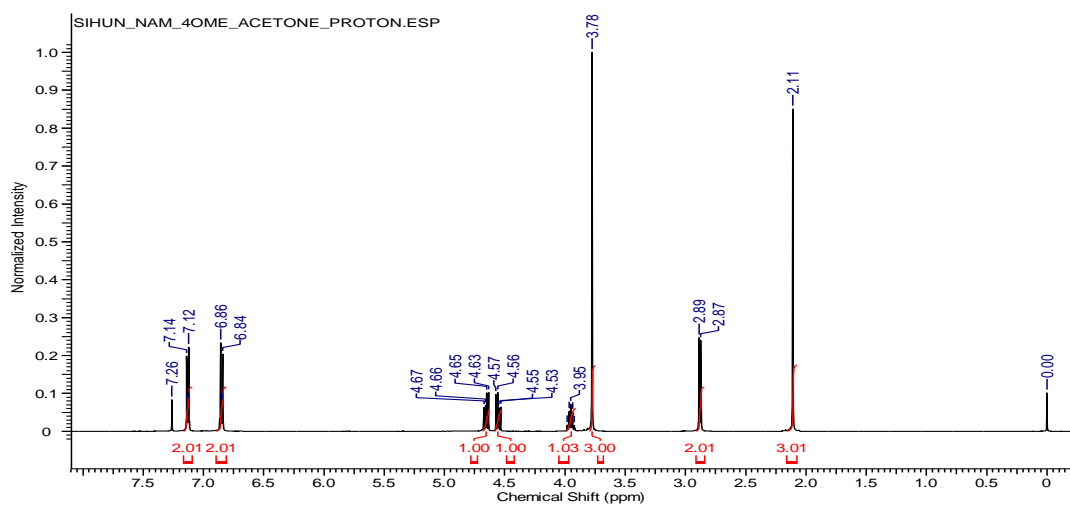

## $^{13}\text{C}$ NMR

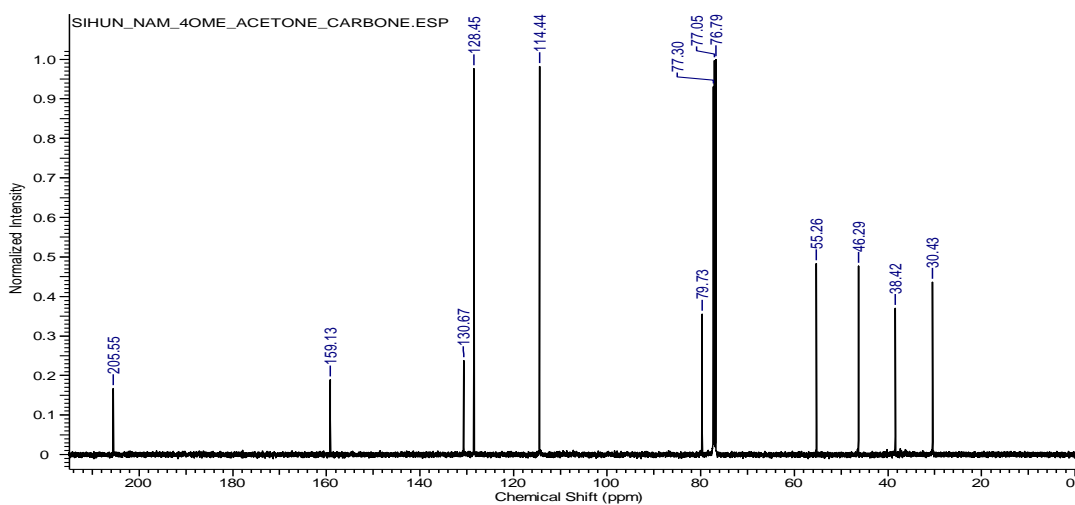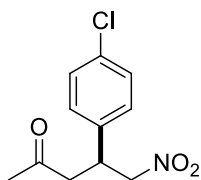

**3c**

LC data

Racemic

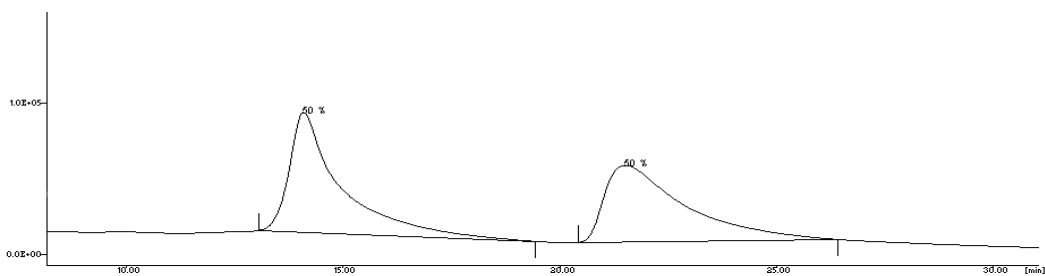

| # | Name | RT     | Area[uV.Sec] | Quantity |
|---|------|--------|--------------|----------|
| 1 |      | 14.083 | 6386737.559  | 0.000    |
| 2 |      | 21.508 | 6393443.750  | 0.000    |

Total Area of Peak = 12780181.309 [uV.Sec]

Asymmetric

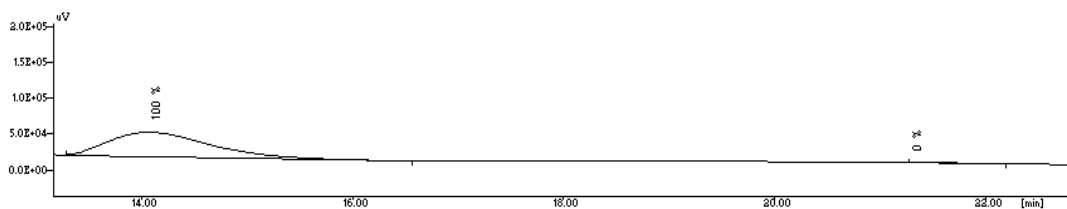

| # | Name | RT     | Area[uV.Sec] | Quantity |
|---|------|--------|--------------|----------|
| 1 |      | 14.067 | 2183761.912  | 0.000    |
| 2 |      | 21.283 | 8401.000     | 0.000    |

Total Area of Peak = 2192162.912 [uV.Sec]

## <sup>1</sup>H NMR

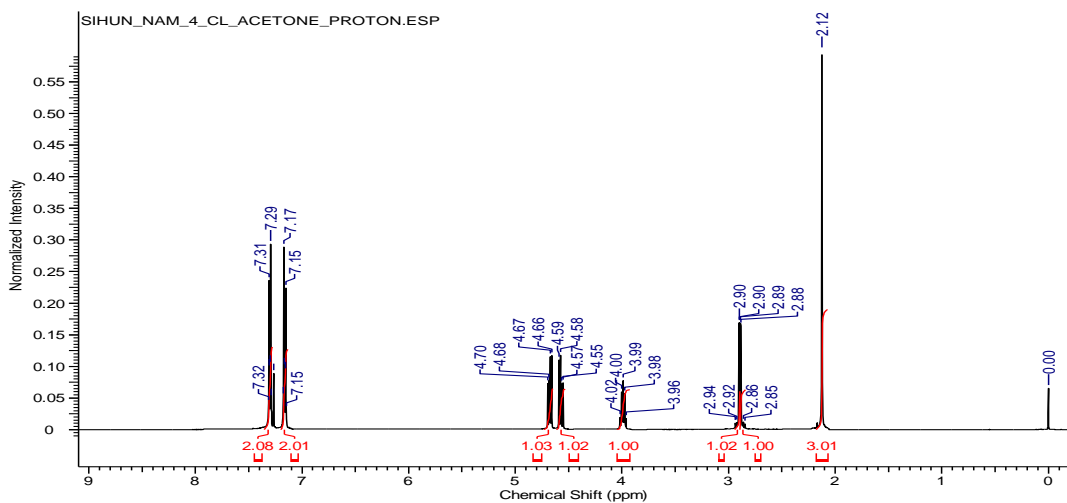

## <sup>13</sup>C NMR

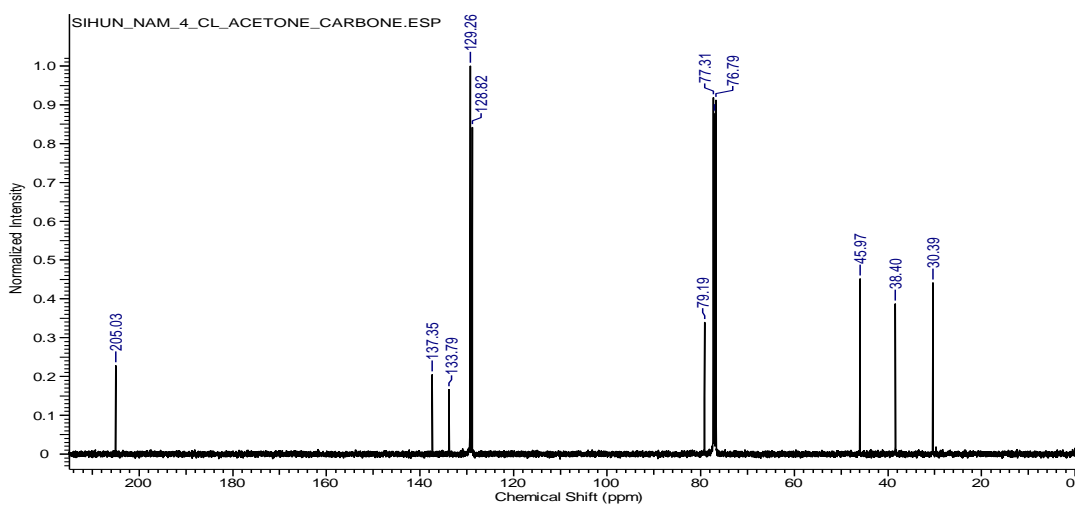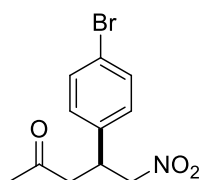

**3d**

LC data

Racemic

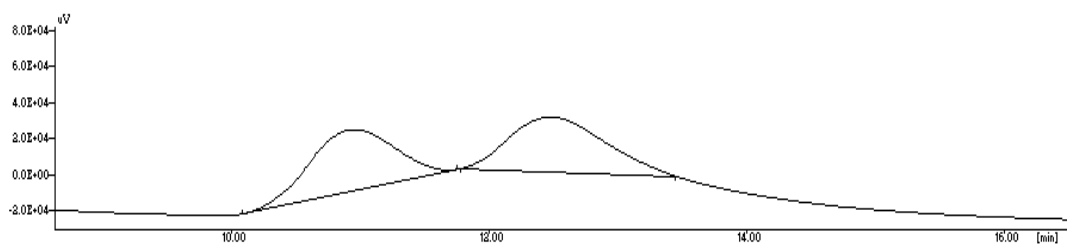

| # | Name | RT     | Area[uV.Sec] | Quantity |
|---|------|--------|--------------|----------|
| 1 |      | 10.950 | 1547389.355  | 0.000    |
| 2 |      | 12.475 | 1569378.500  | 0.000    |

Total Area of Peak = 3116767.855 [uV.Sec]

## Asymmetric

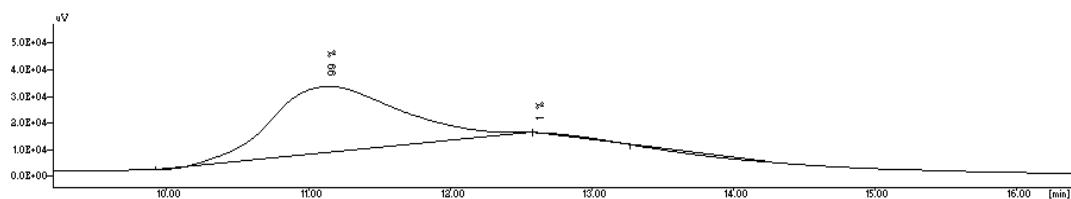

| #                                         | Name | RT     | Area[uV.Sec] | Quantity |
|-------------------------------------------|------|--------|--------------|----------|
| 1                                         |      | 11.125 | 1576694.008  | 0.000    |
| 2                                         |      | 12.592 | 18015.470    | 0.000    |
| Total Area of Peak = 1594709.478 [uV.Sec] |      |        |              |          |

## <sup>1</sup>H NMR

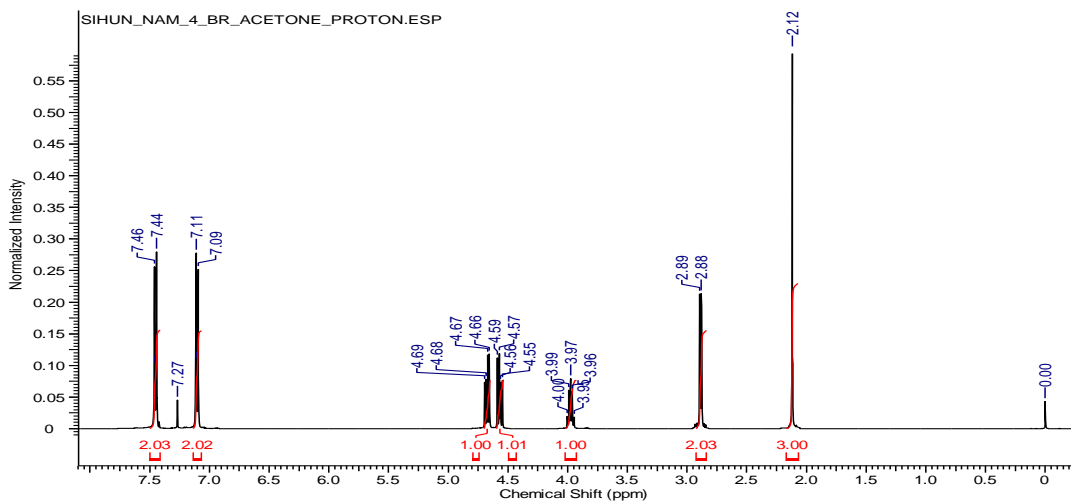

## <sup>13</sup>C NMR

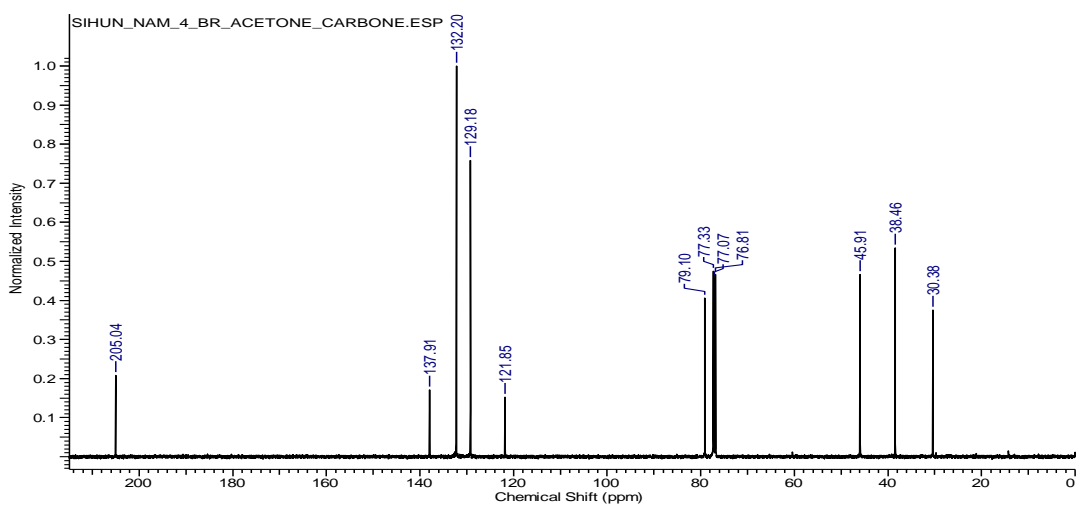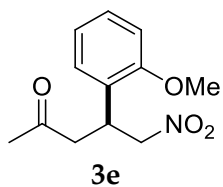

LC data

Racemic

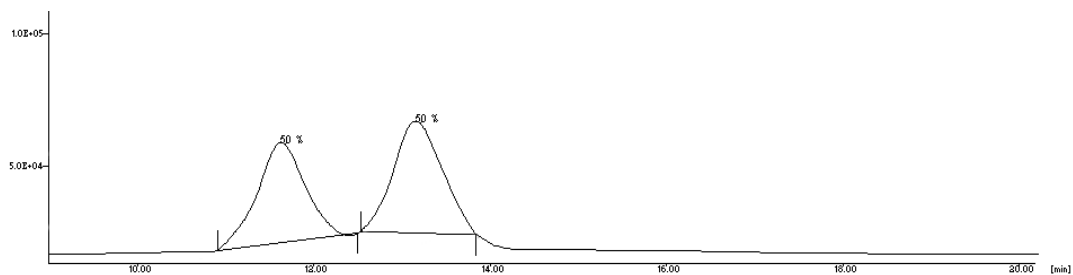

| #                                         | Name | RT     | Area[uV.Sec] | Quantity |
|-------------------------------------------|------|--------|--------------|----------|
| 1                                         |      | 11.633 | 1399275.118  | 0.000    |
| 2                                         |      | 13.167 | 1413826.250  | 0.000    |
| Total Area of Peak = 2812301.368 [uV.Sec] |      |        |              |          |

## Asymmetric

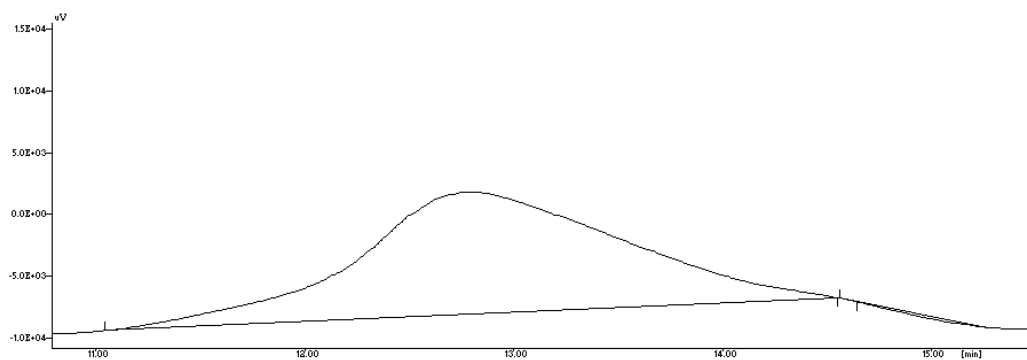

| # | Name | RT     | Area[uV.Sec] | Quantity |
|---|------|--------|--------------|----------|
| 1 |      | 12.808 | 869024.000   | 0.000    |
| 2 |      | 14.567 | 116.706      | 0.000    |

Total Area of Peak = 869140.706 [uV.Sec]

## $^1\text{H}$ NMR

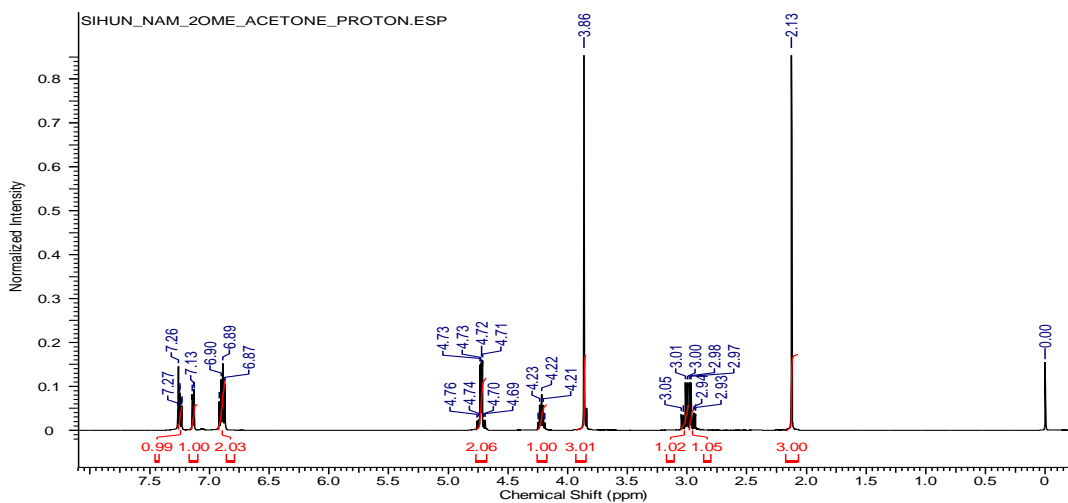

### <sup>13</sup>C NMR

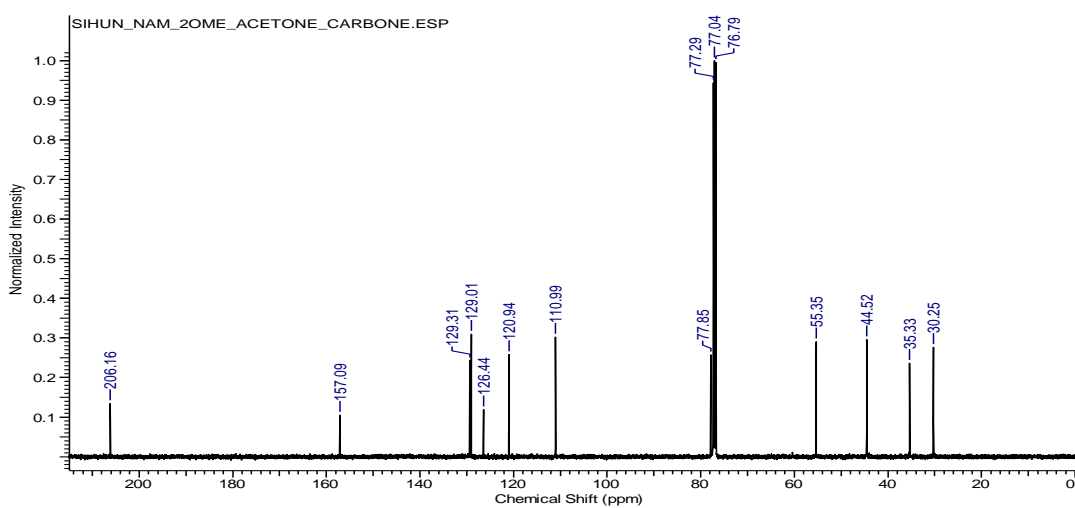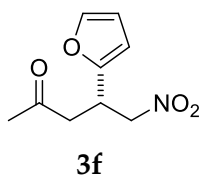

LC data

Racemic

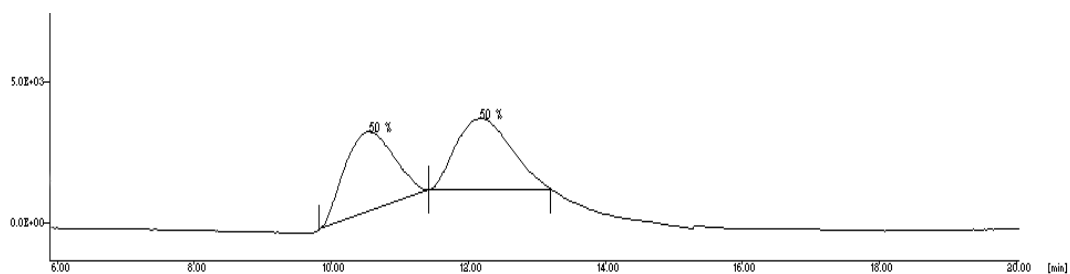

| #                                        | Name | RT     | Area[uV.Sec] | Quantity |
|------------------------------------------|------|--------|--------------|----------|
| 1                                        |      | 10.558 | 137952.844   | 0.000    |
| 2                                        |      | 12.175 | 137374.276   | 0.000    |
| Total Area of Peak = 275327.120 [uV.Sec] |      |        |              |          |

Asymmetric

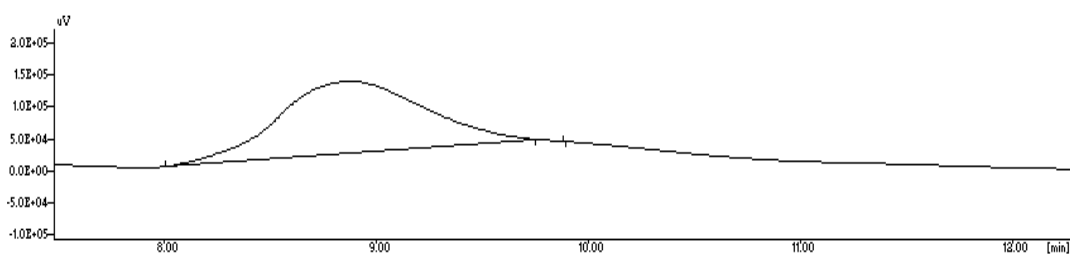

| #                                         | Name | RT    | Area[uV.Sec] | Quantity |
|-------------------------------------------|------|-------|--------------|----------|
| 1                                         |      | 8.875 | 5325457.500  | 0.000    |
| 2                                         |      | 9.867 | 22870.000    | 0.000    |
| Total Area of Peak = 5348327.500 [uV.Sec] |      |       |              |          |

$^1\text{H}$  NMR

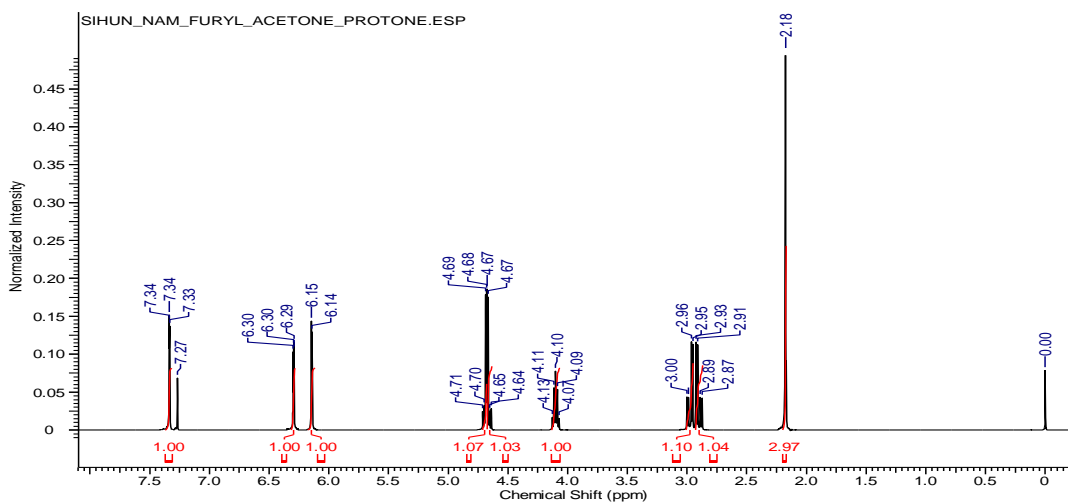

### <sup>13</sup>C NMR

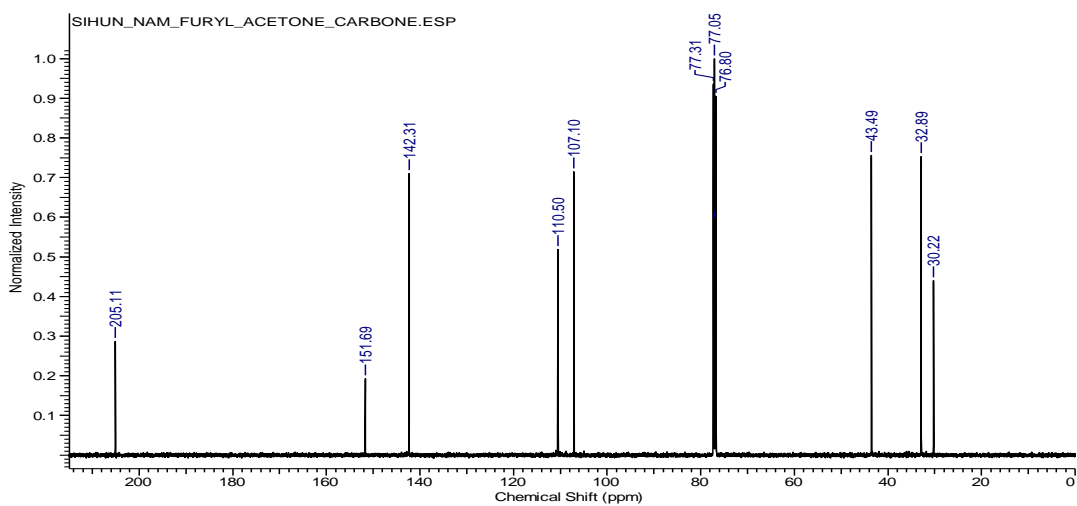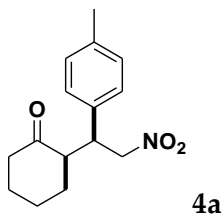

LC data

racemic

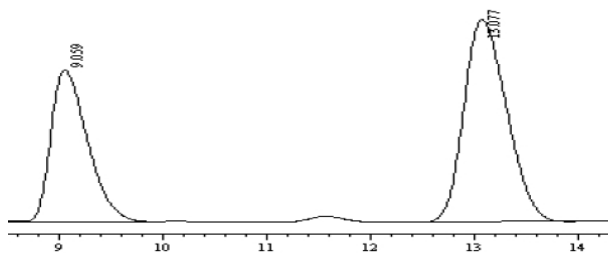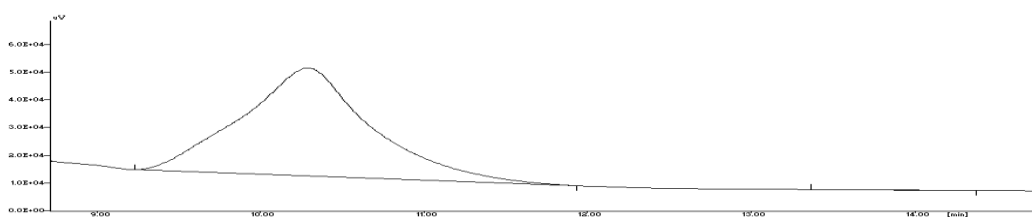

| # | Name | RT     | Area[uV.Sec] | Quantity |
|---|------|--------|--------------|----------|
| 1 |      | 10.292 | 2131081.750  | 0.000    |
| 2 |      | 13.383 | 1543.000     | 0.000    |

Total Area of Peak = 2132624.750 [uV.Sec]

<sup>1</sup>H NMR

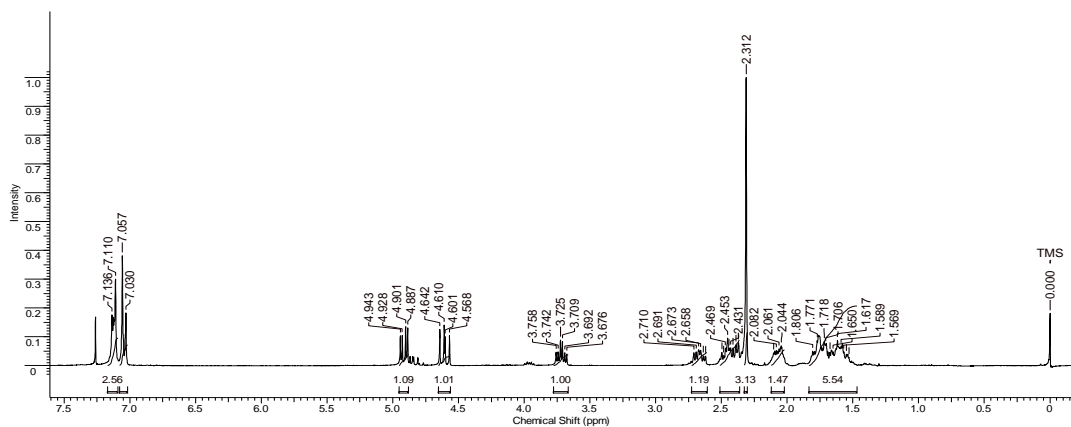

<sup>13</sup>C NMR

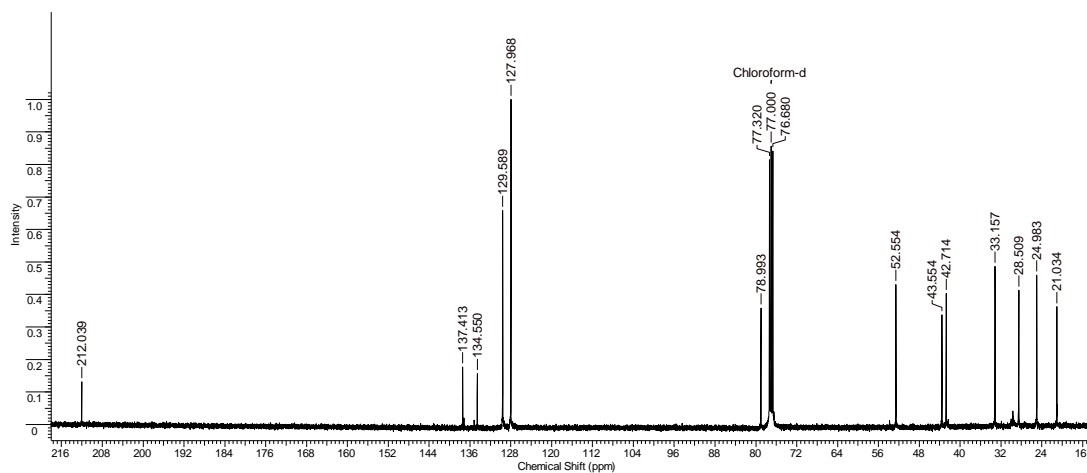

## Mass

[ Mass Spectrum ]  
 Data : LFAB-P20091222007 Date : 21-Nov-109 13:47  
 Sample: KGW-460  
 Note : with NBR/  
 Inlet : Direct Ion Mode : FAB+  
 Spectrum Type : Normal Ion [MF-Linear]  
 RT : 0.34 min Scan# : 5 Temp : 34.6 deg.C  
 BP : m/z 145.1357 Int. : 30.30  
 Output m/z range : 232.4322 to 294.6657 Cut Level : 0.00 %

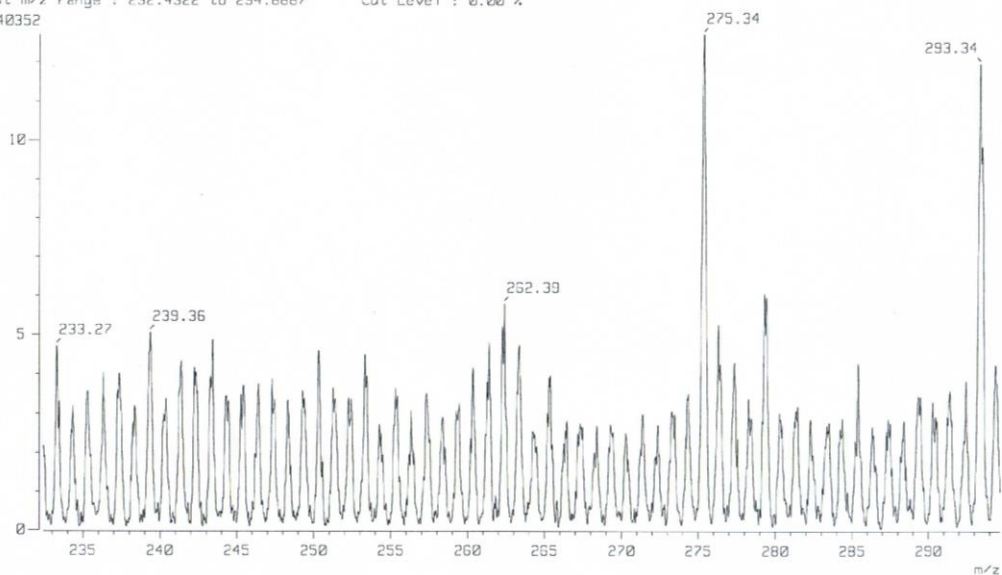

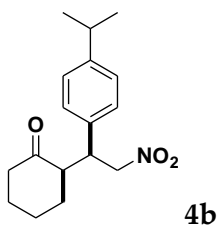

LC data

racemic

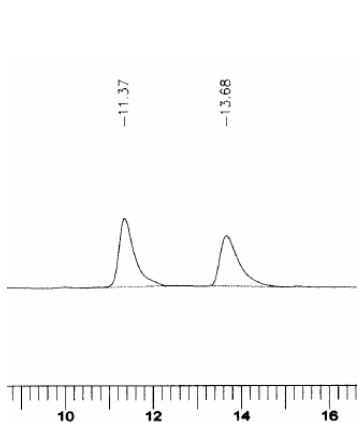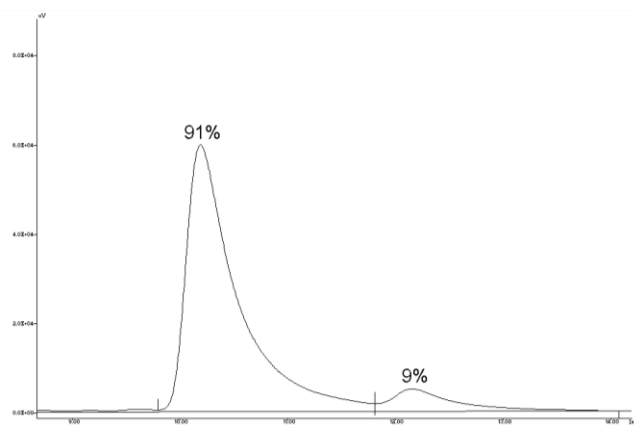

| # | Name | RT     | Area[uV.Sec] | Quantity |
|---|------|--------|--------------|----------|
| 1 |      | 10.192 | 2000388.414  | 0.000    |
| 2 |      | 12.158 | 207832.166   | 0.000    |

Total Area of Peak = 2208220.581 [uV.Sec]

<sup>1</sup>H NMR

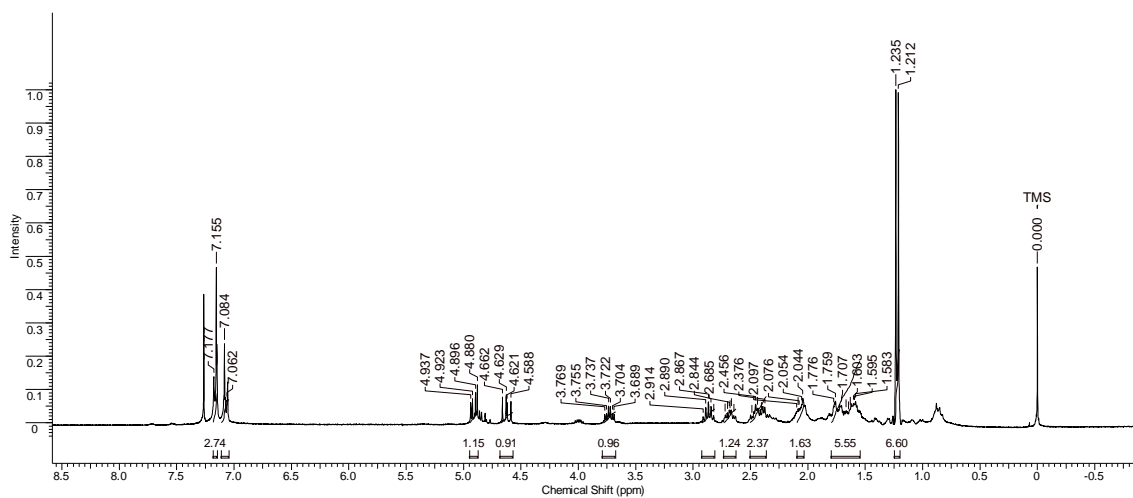

<sup>13</sup>C NMR

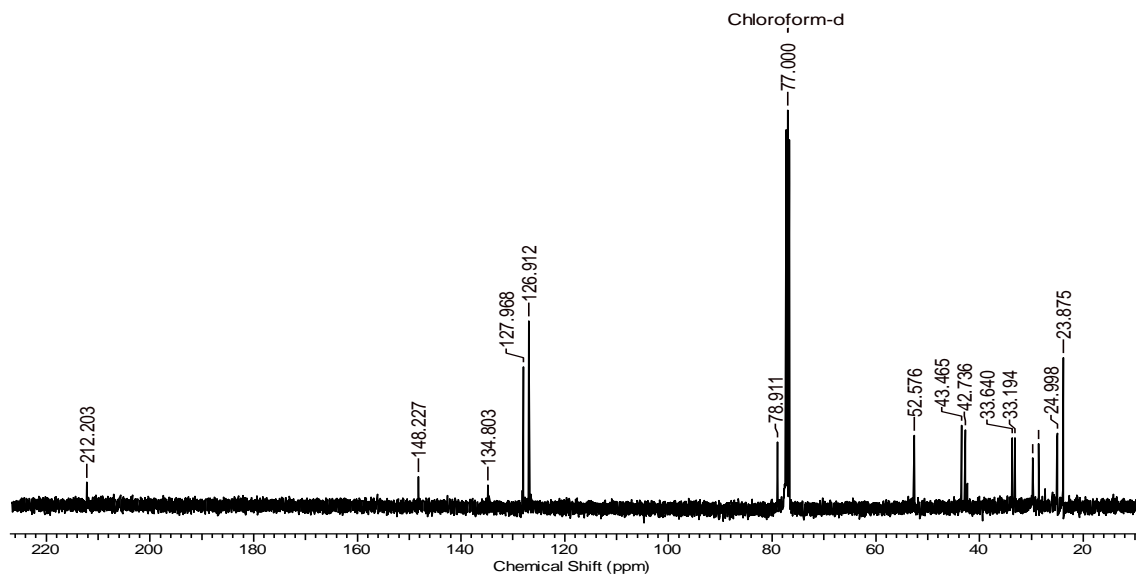

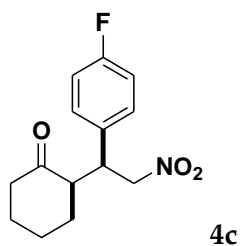

LC data

racemic

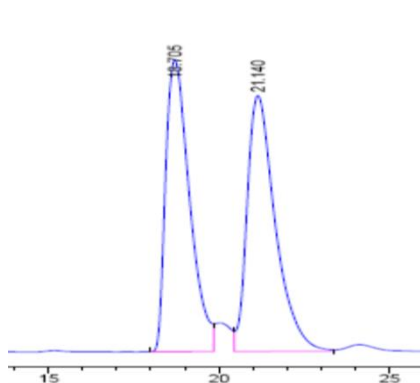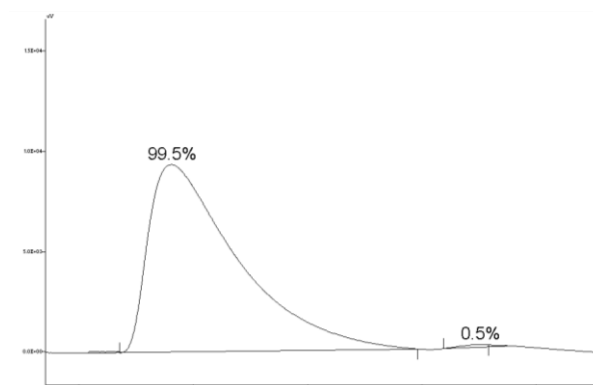

| # | Name | RT     | Area[uV.Sec] | Quantity |
|---|------|--------|--------------|----------|
| 1 |      | 19.292 | 1416102.812  | 0.000    |
| 2 |      | 25.533 | 384599.179   | 0.000    |

Total Area of Peak = 1800701.991 [uV.Sec]

<sup>1</sup>H NMR

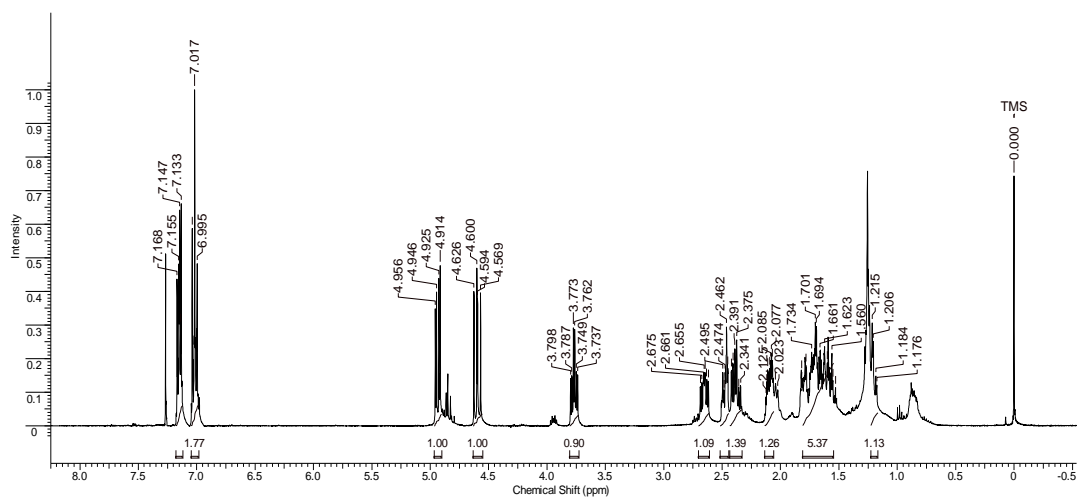

## <sup>13</sup>C NMR

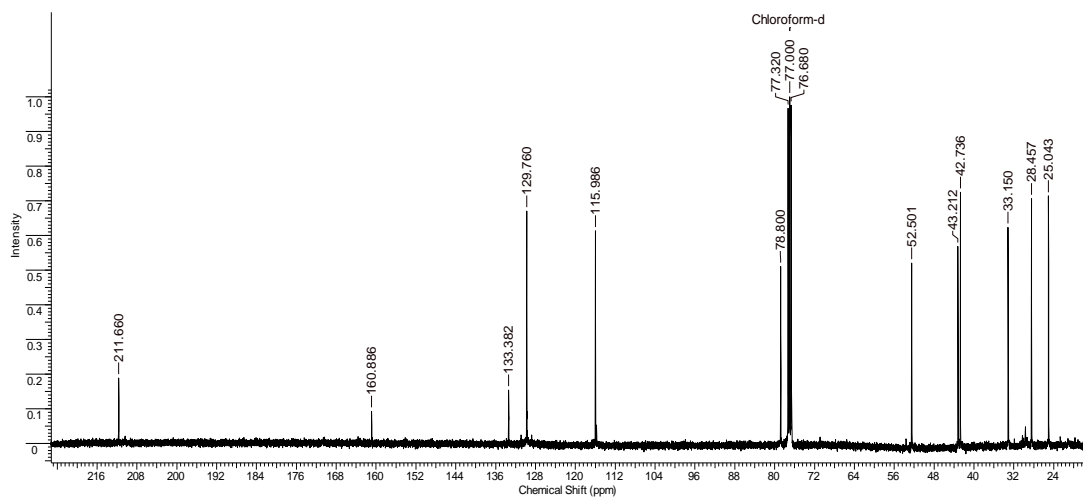

## Mass

Note : with NBA/  
Inlet : Direct Ion Mode : FAP+  
Spectrum Type : Normal Ion [MF-Linear]  
RT : 0.25 min Scan# : 4 Temp : 34.6 deg.C  
BP : m/z 149.2514 Int. : 10.52  
Output m/z range : 240.3095 to 290.1611 Cut Level : 0.00 %

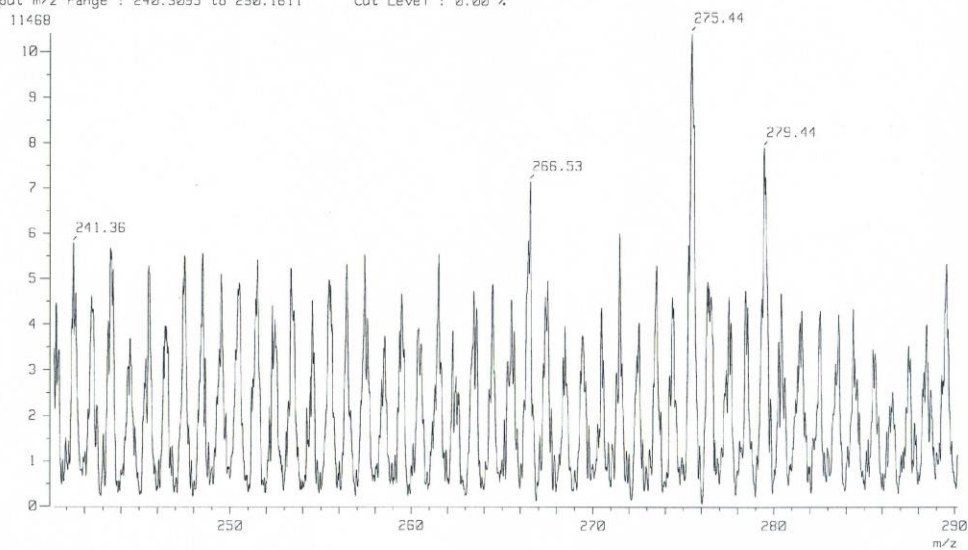

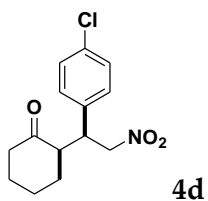

LC data

racemic

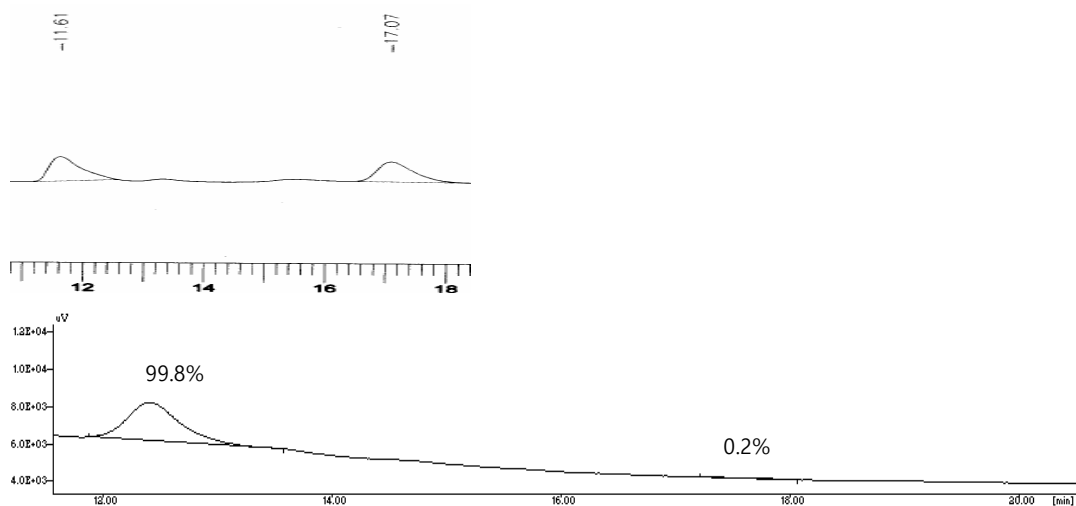

| # | Name | RT     | Area[uV.Sec] | Quantity |
|---|------|--------|--------------|----------|
| 1 |      | 12.392 | 65651.549    | 0.000    |
| 2 |      | 17.242 | 158.500      | 0.000    |

Total Area of Peak = 65810.049 [uV.Sec]

<sup>1</sup>H NMR

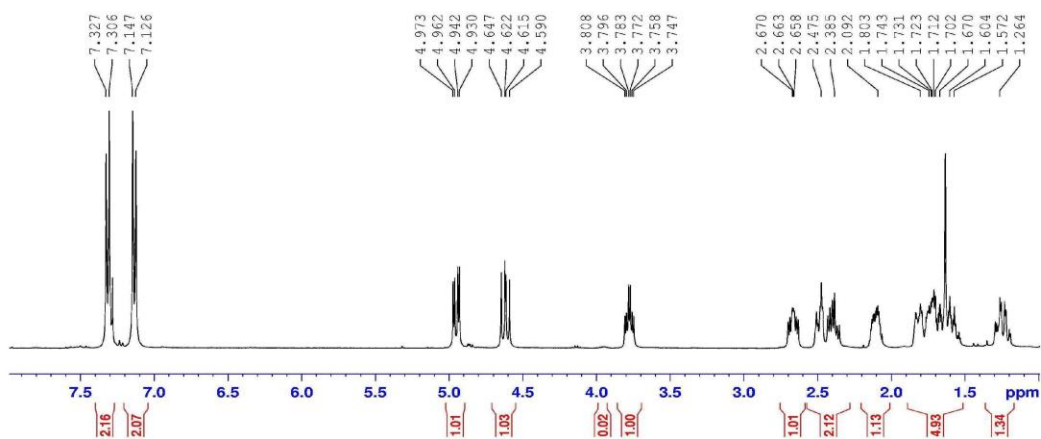

**$^{13}\text{C}$  NMR**

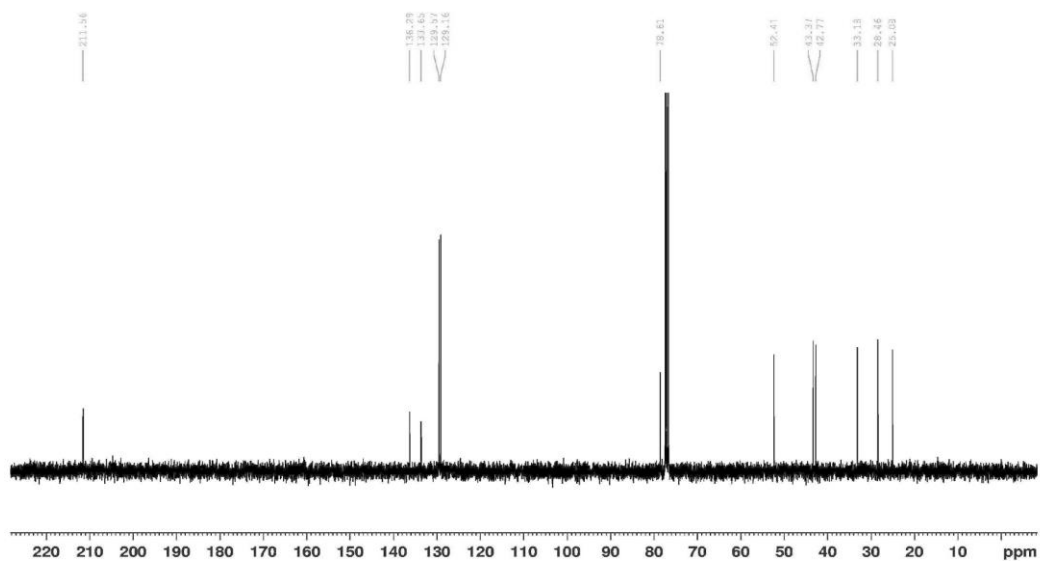

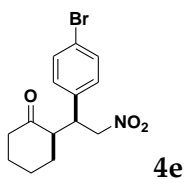

LC data

racemic

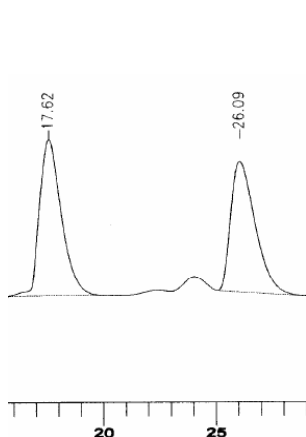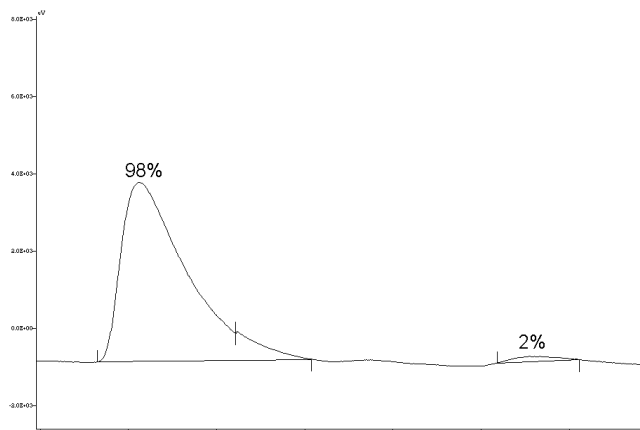

| # | Name | RT     | Area[uV.Sec] | Quantity |
|---|------|--------|--------------|----------|
| 1 |      | 20.225 | 450132.882   | 0.000    |
| 2 |      | 29.083 | 9549.000     | 0.000    |

Total Area of Peak = 459681.882 [uV.Sec]

<sup>1</sup>H NMR

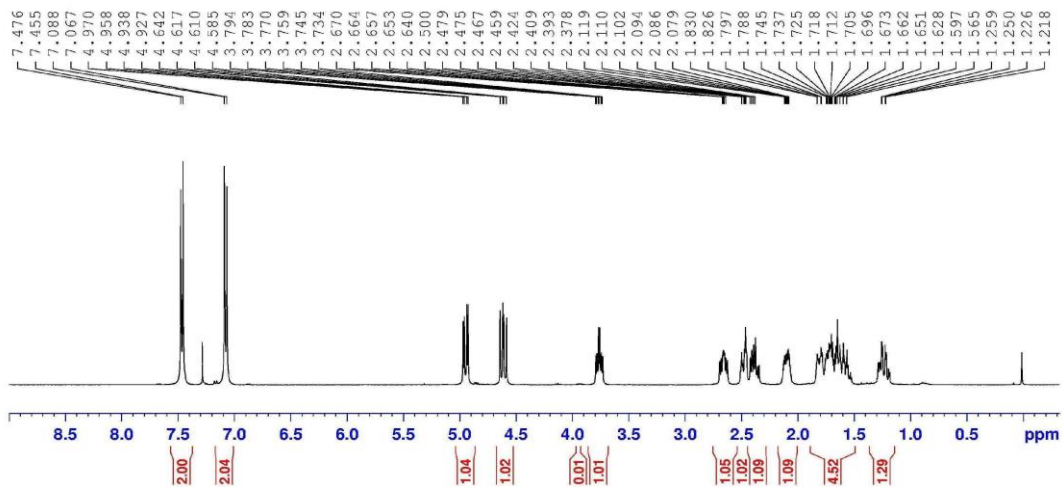

## <sup>13</sup>C NMR

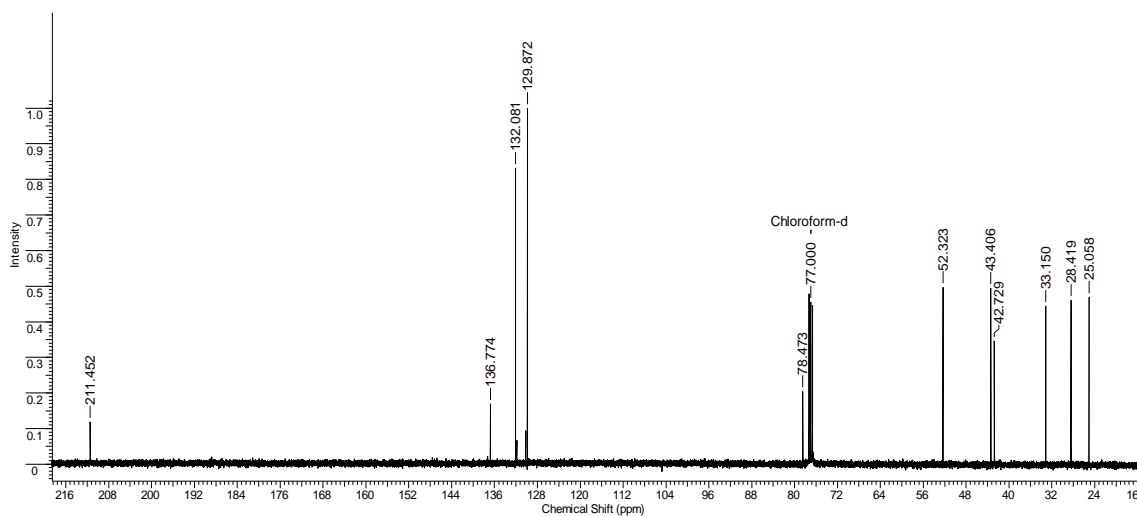

## Mass

Note : with NBR/  
Inlet : Direct Ion Mode : FAD+  
Spectrum Type : Normal Ion [MF-Linear]  
RT : 0.59 min Scan# : 8 Temp : 34.5 deg.C  
BP : m/z 149.1486 Int. : 31.75  
Output m/z range : 295.1937 to 363.7397 Cut Level : 0.00 %

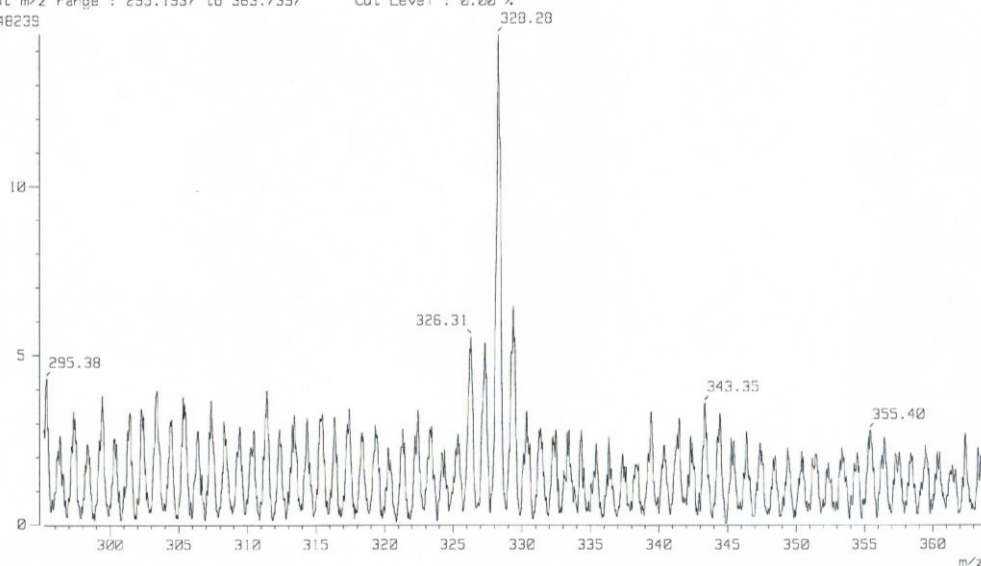

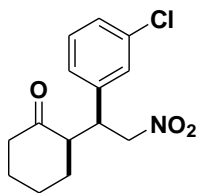

4f

LC data

Racemic

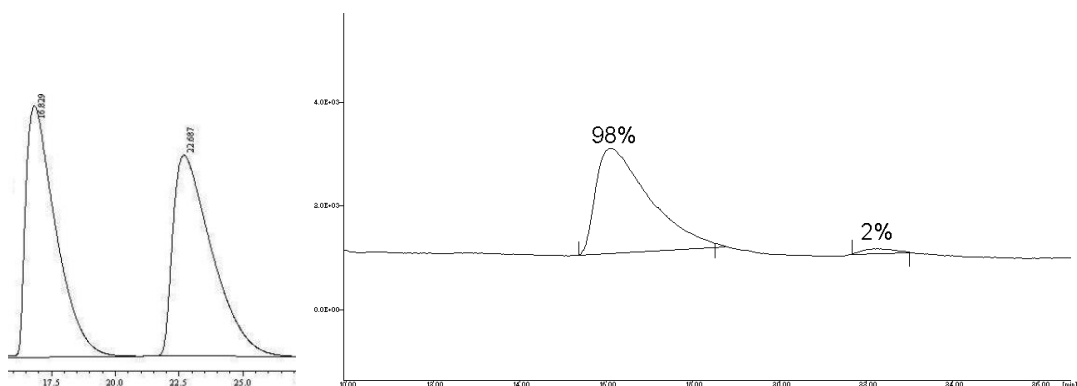

| # | Name | RT     | Area[uV.Sec] | Quantity |
|---|------|--------|--------------|----------|
| 1 |      | 16.092 | 171111.478   | 0.000    |
| 2 |      | 22.167 | 4330.250     | 0.000    |

Total Area of Peak = 175441.728 [uV.Sec]

<sup>1</sup>H NMR

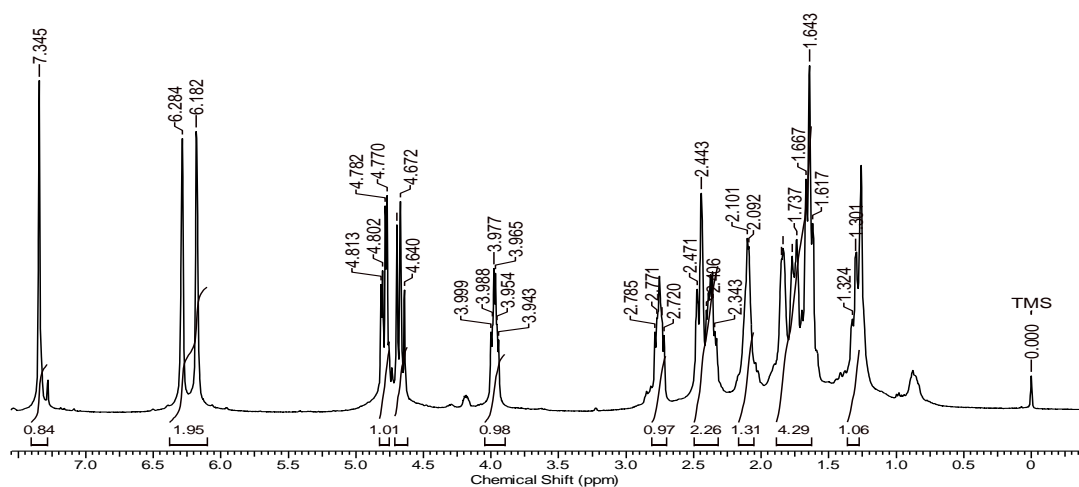

# <sup>13</sup>C NMR

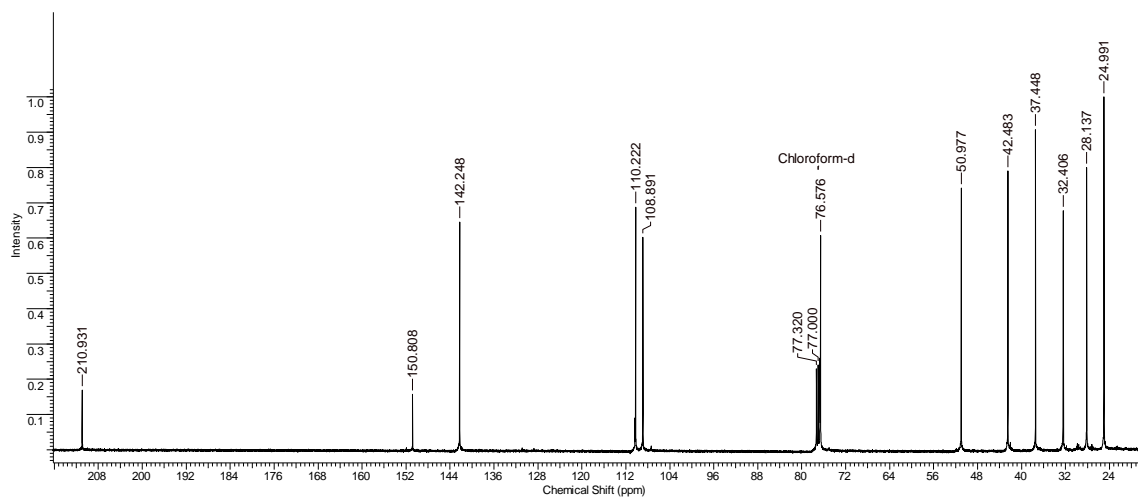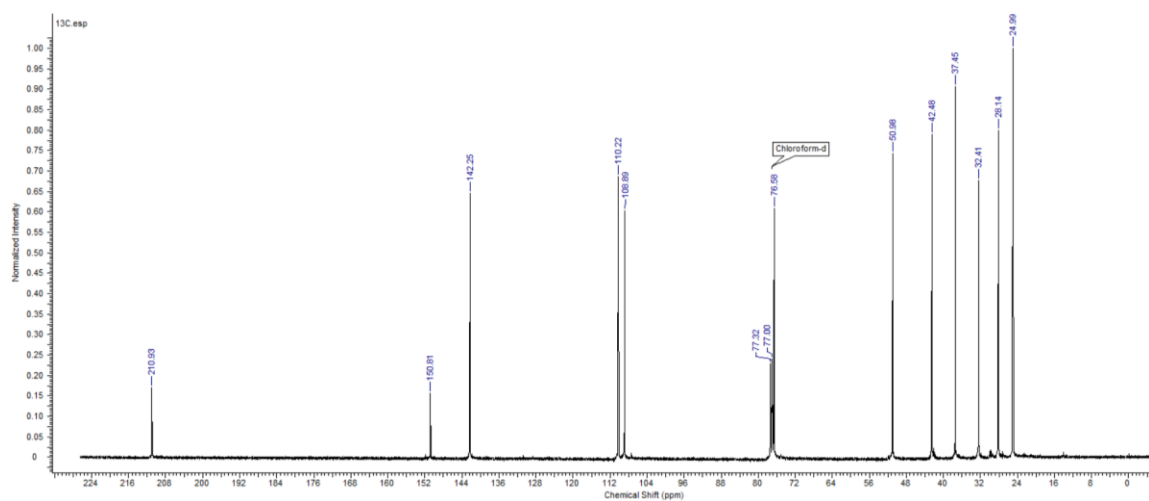

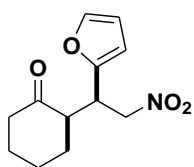

4g

LC data

racemic

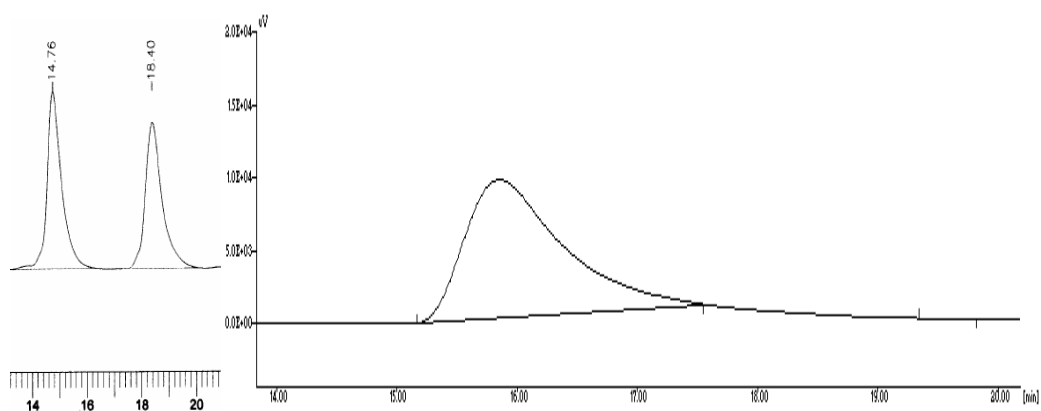

| # | Name | RT     | Area[uV.Sec] | Quantity |
|---|------|--------|--------------|----------|
| 1 |      | 15.867 | 538192.000   | 0.000    |
| 2 |      | 19.392 | 69.500       | 0.000    |

Total Area of Peak = 538261.500 [uV.Sec]

<sup>1</sup>H NMR

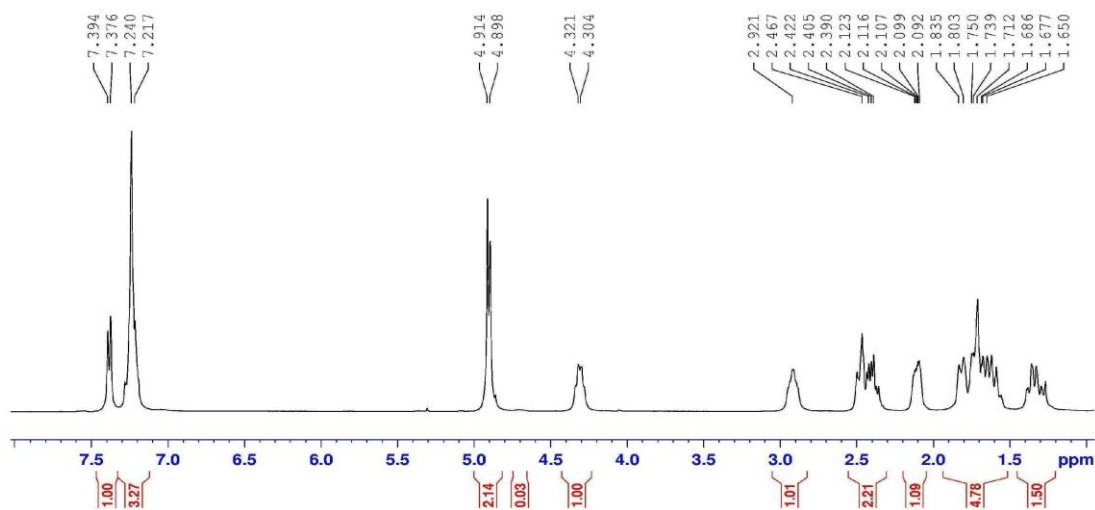

## <sup>13</sup>C NMR

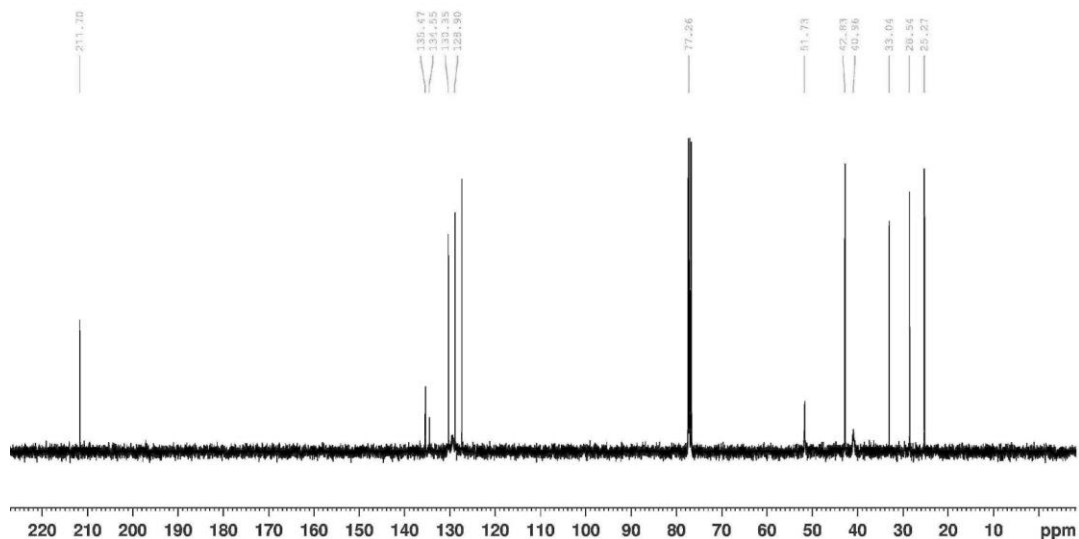

## Mass

[ Elemental Composition ]

Data : HFAB-POS-091223020

Date : 23-Dec-2009 17:05

Sample: KGW-468

Note :

Inlet : Direct

Ion Mode : FAB+

RT : 2.17 min

Scan#: 27

Elements : C 12/0, H 16/0, O 4/0, N 1/0

Mass Tolerance : 10mmu

Unsaturation (U.S.) : 0.0 - 100.0

Observed m/z Int%

238.1080 12.7

Estimated m/z Error [ppm]

238.1079 +0.1

U.S.  
5.5

C  
12

H  
16

O  
4

N  
1

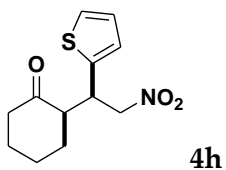

LC data

racemic

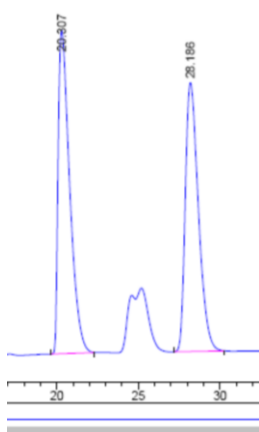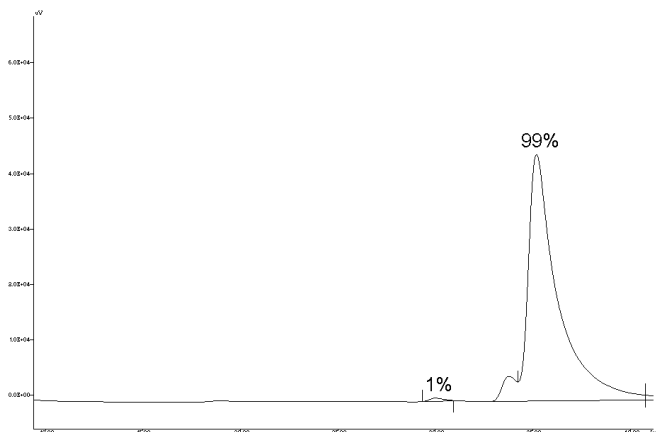

| # | Name | RT     | Area[uV.Sec] | Quantity |
|---|------|--------|--------------|----------|
| 1 |      | 29.958 | 33101.830    | 0.000    |
| 2 |      | 35.167 | 4566167.050  | 0.000    |

Total Area of Peak = 4599268.880 [uV.Sec]

<sup>1</sup>H NMR

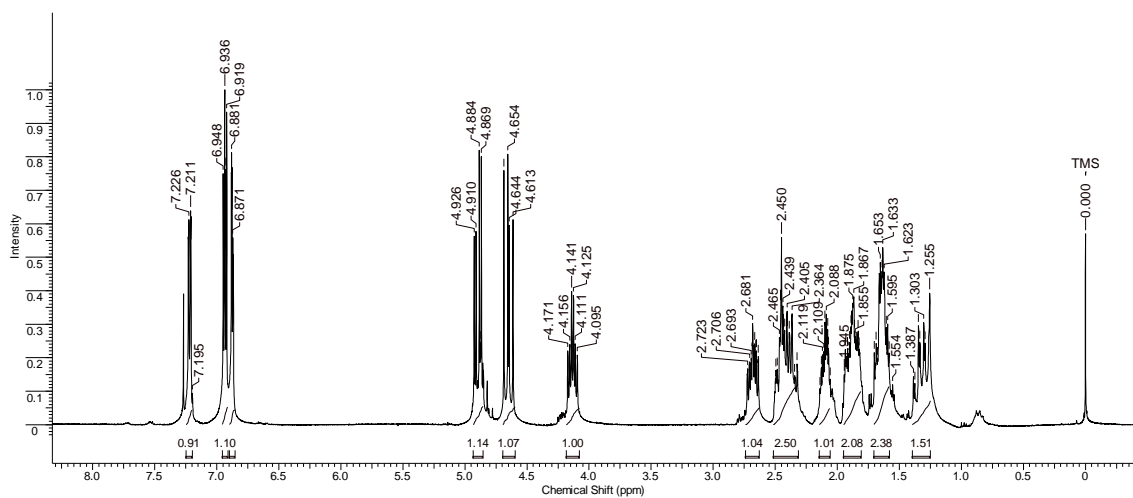

# <sup>13</sup>C NMR

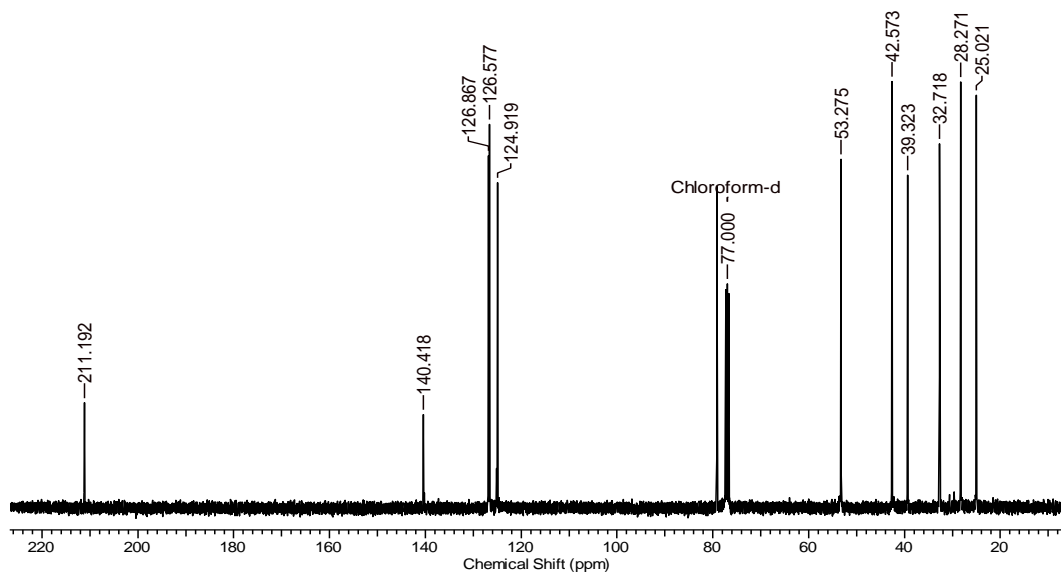

## Mass

[ Elemental Composition ]

Data : HFAB-POS-091223021

Date : 23-Dec-2009 17:16

Sample: KGW-471

Note :

Inlet : Direct

Ion Mode : FAB+

RT : 2.09 min

Scan#: 26

Elements : C 12/0, H 16/0, O 3/0, N 1/0, S 1/0

Mass Tolerance : 10mmu

Unsaturation (U.S.) : 0.0 - 100.0

|               |             |      |    |    |   |   |   |
|---------------|-------------|------|----|----|---|---|---|
| Observed m/z  | Int%        |      |    |    |   |   |   |
| 254.0853      | 19.3        |      |    |    |   |   |   |
| Estimated m/z | Error [ppm] | U.S. | C  | H  | O | N | S |
| 254.0851      | +0.9        | 6.5  | 12 | 16 | 3 | 1 | 1 |

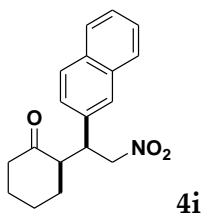

LC data

racemic

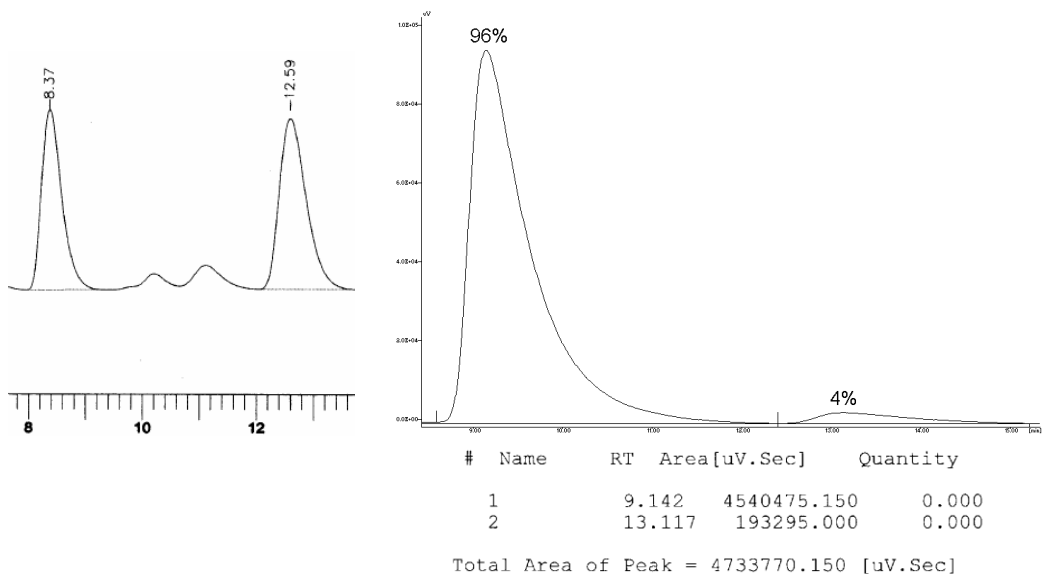

<sup>1</sup>H NMR

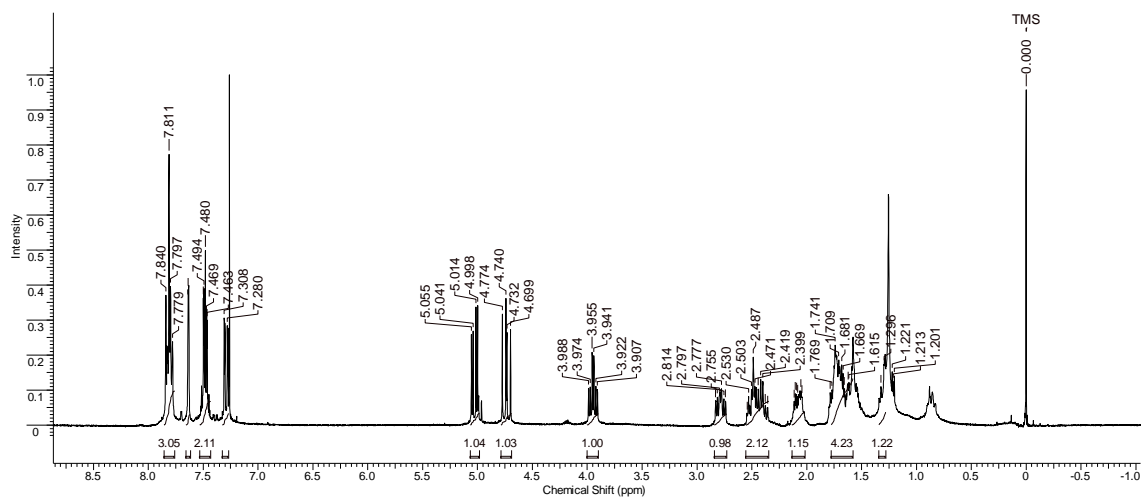

## <sup>13</sup>C NMR

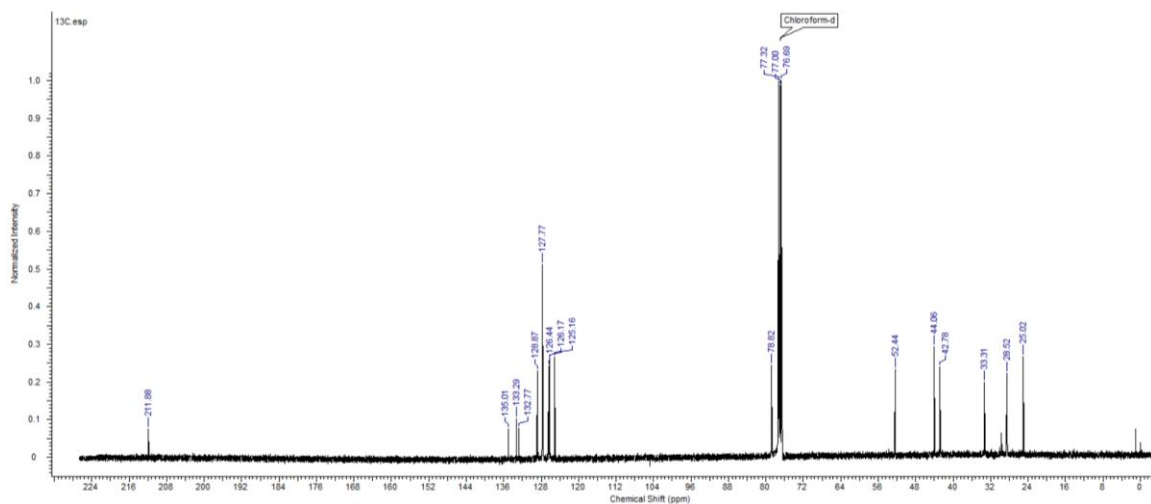

## Mass

Note : with NBA✓  
 Inlet : Direct Ion Mode : FAB+  
 Spectrum type : Normal Ion [MF-Linear]  
 RT : 0.09 min Scan# : 2 Temp : 34.8 deg.C  
 BP : m/z 154.1158 Int. : 12.79  
 Output m/z range : 282.4288 to 313.5860 Cut Level : 0.00 %

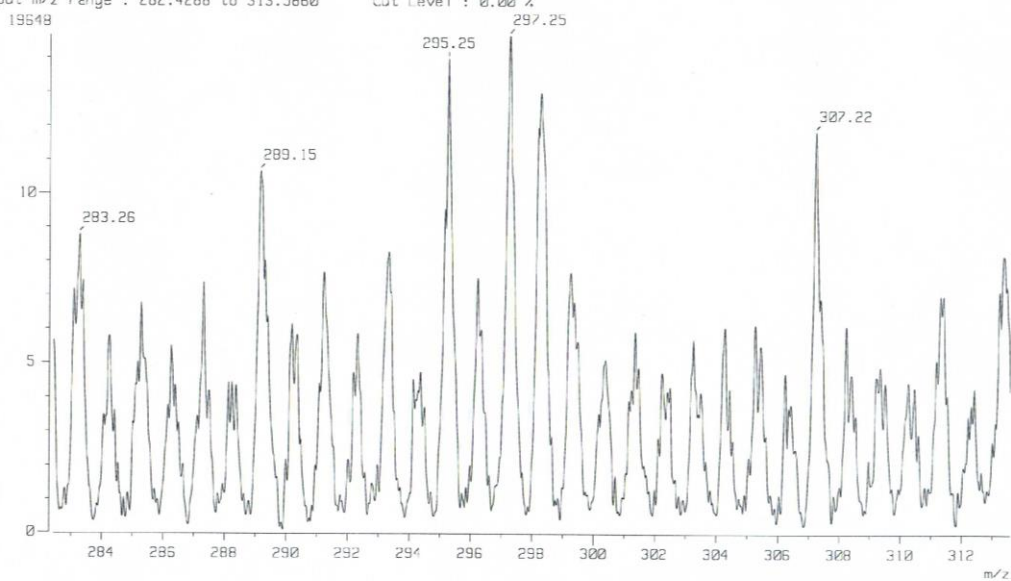

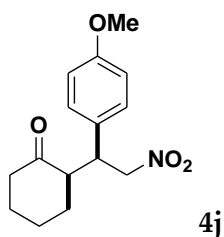

LC data

racemic

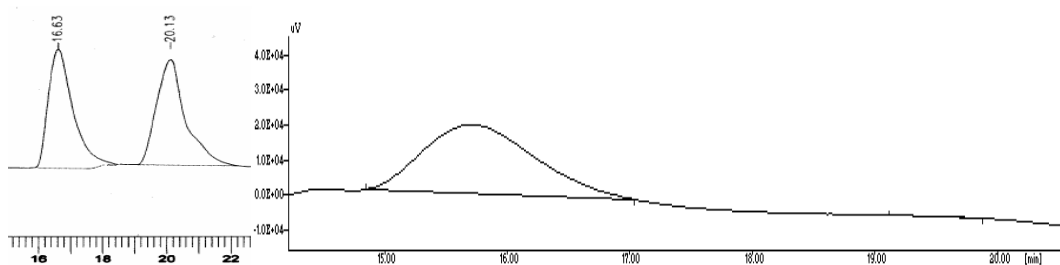

| # | Name | RT     | Area[uV.Sec] | Quantity |
|---|------|--------|--------------|----------|
| 1 |      | 15.717 | 1241867.258  | 8.000    |
| 2 |      | 19.142 | 7222.000     | 0.000    |

Total Area of Peak = 1248289.258 [uV.Sec]

$^1\text{H}$  NMR

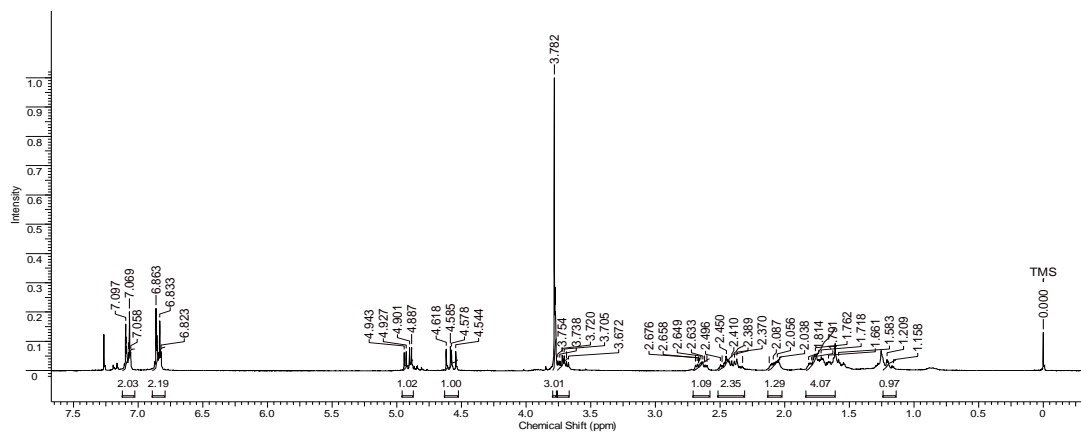

# <sup>13</sup>C NMR

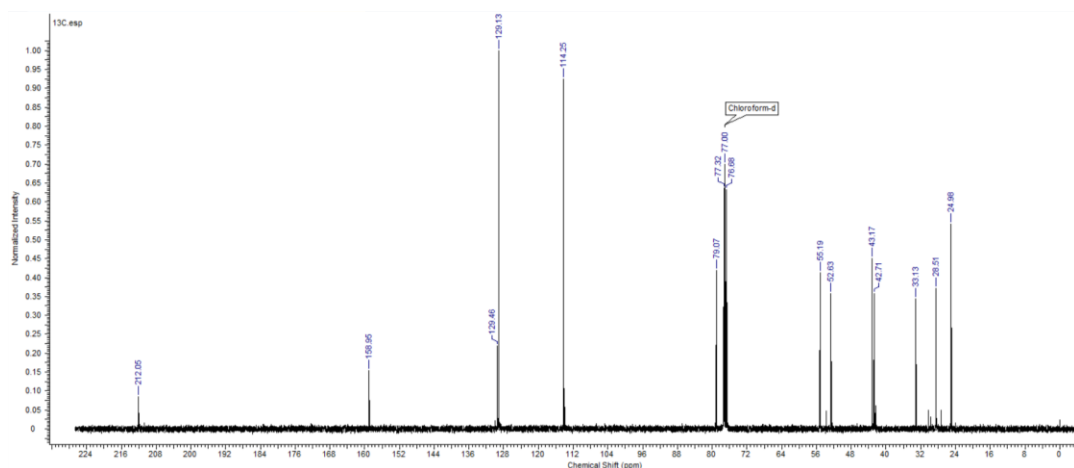

# Mass

Inlet : Direct Ion Mode : FRR+  
 Spectrum Type : Normal Ion [MF-Linear]  
 RT : 1.75 min Scan# : 22  
 BP : m/z 231.1374 Int. : 15.19  
 Output m/z range : 278.1152 to 278.1634 Cut Level : 0.00 %

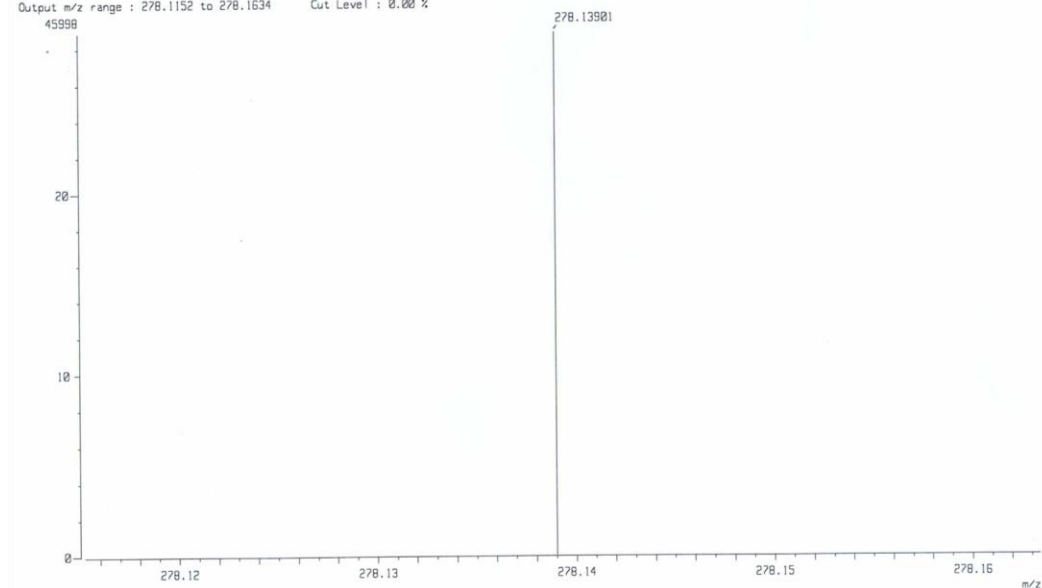

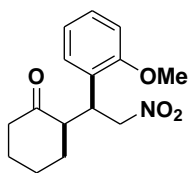

4k

LC data

racemic

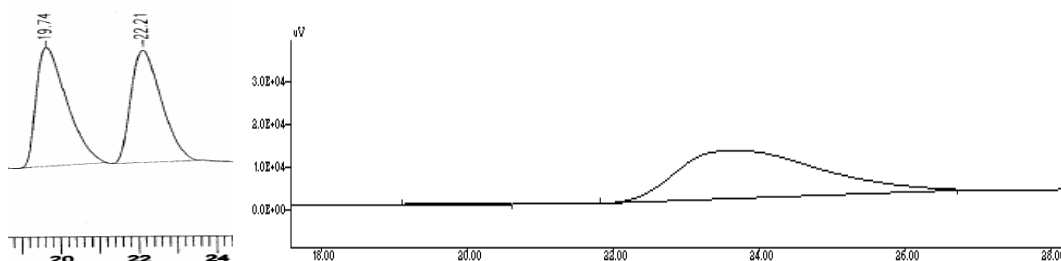

| # | Name | RT     | Area[uV.Sec] | Quantity |
|---|------|--------|--------------|----------|
| 1 |      | 19.758 | 4042.809     | 0.000    |
| 2 |      | 23.683 | 1513756.491  | 0.000    |

Total Area of Peak = 1517799.300 [uV.Sec]

<sup>1</sup>H NMR

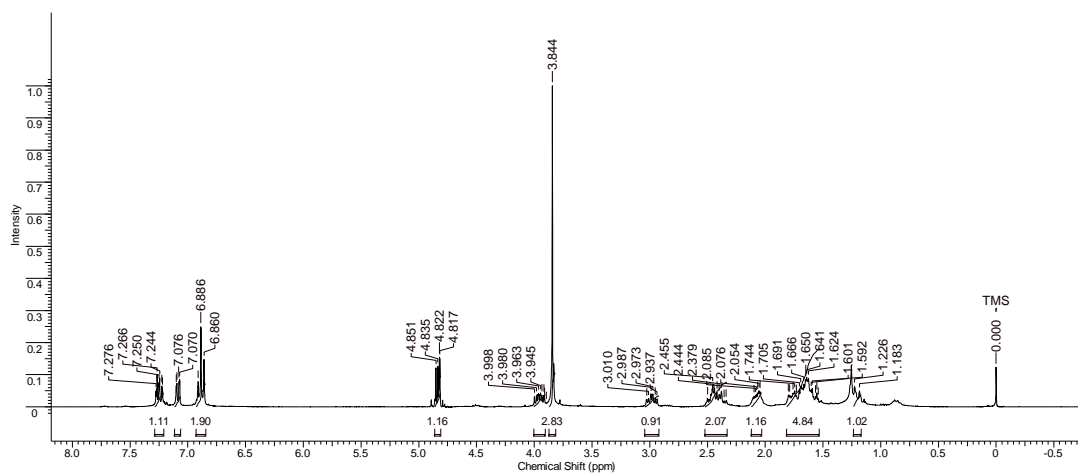

# <sup>13</sup>C NMR

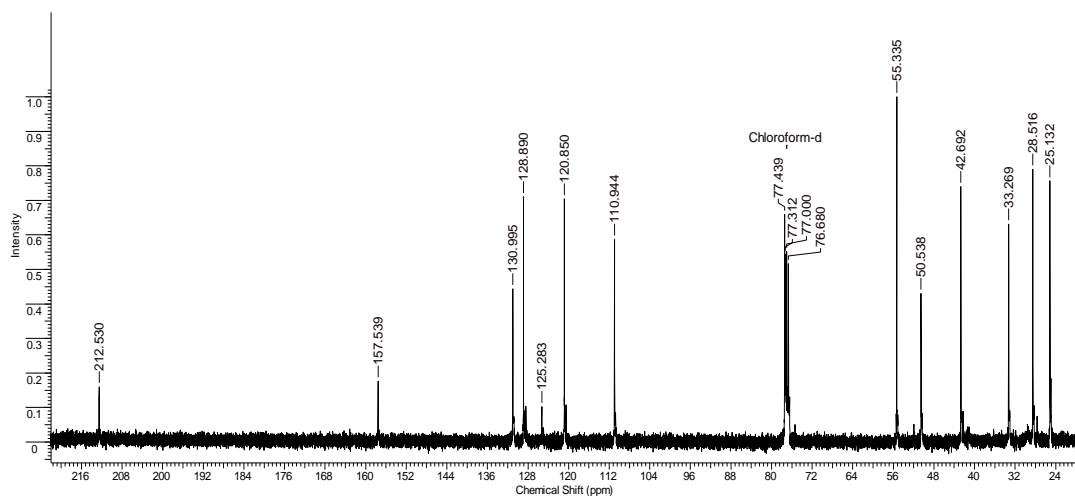

## Mass

[ Elemental Composition ]

Data : HFAB-POS-091229002

Date : 29-Dec-2009 17:56

Sample: 465

Note :

Inlet : Direct

Ion Mode : FAB+

RT : 1.75 min

Scan#: 22

Elements : C 15/0, H 20/0, O 4/0, N 1/0

Mass Tolerance : 10mmu

Unsaturation (U.S.) : 0.0 - 100.0

Observed m/z

Int%

278.1390

28.9

Estimated m/z

Error [ppm]

U.S.

C

H

O

N

278.1392

-0.8

6.5

15

20

4

1

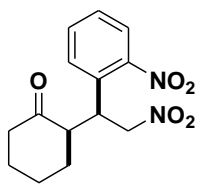

41

LC data

racemic

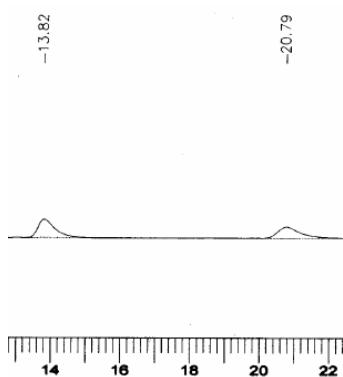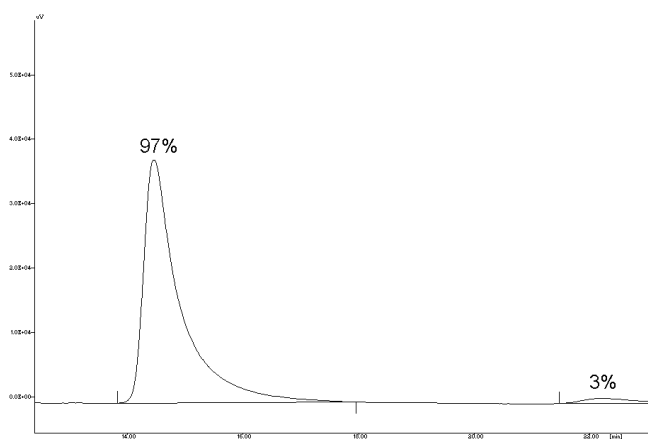

| # | Name | RT     | Area[uV.Sec] | Quantity |
|---|------|--------|--------------|----------|
| 1 |      | 14.450 | 1631400.500  | 0.000    |
| 2 |      | 22.225 | 43091.037    | 0.000    |

Total Area of Peak = 1674491.537 [uV.Sec]

<sup>1</sup>H NMR

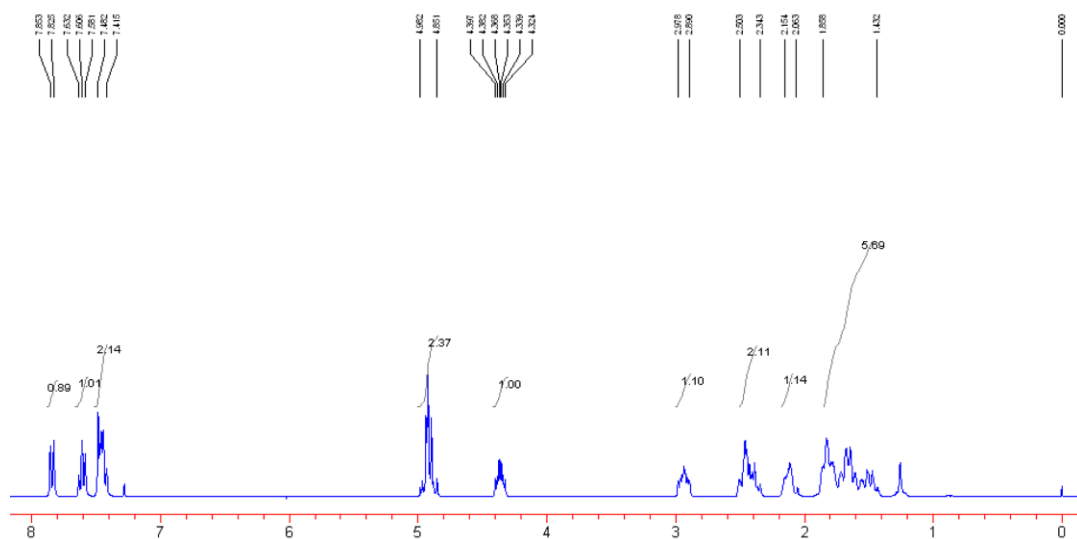

### <sup>13</sup>C NMR

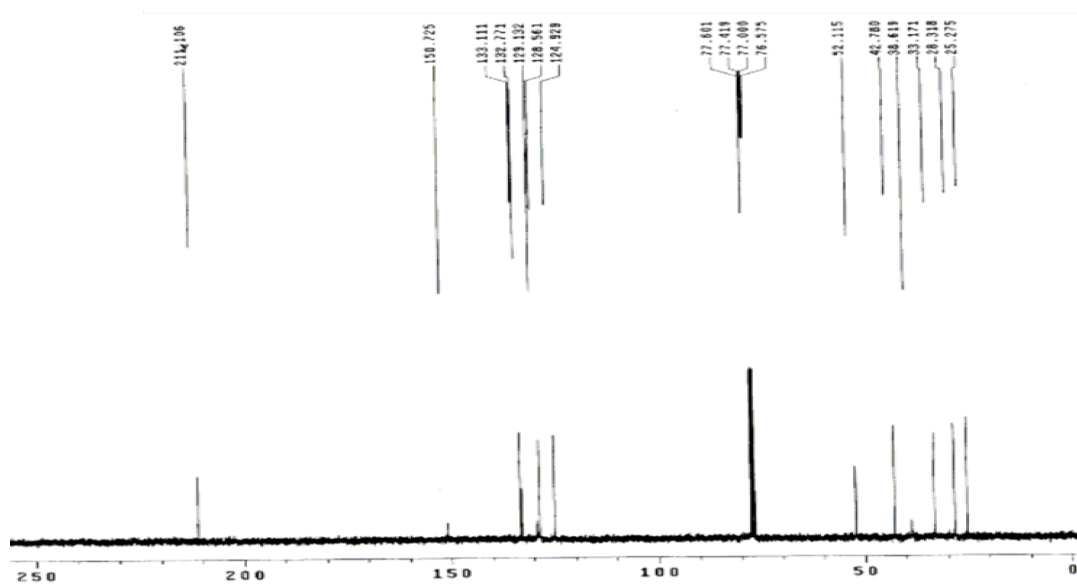

### Mass

Inlet : Direct Ion Mode : FFB+  
 Spectrum Type : Normal Ion [MF-Linear]  
 RT : 2.42 min Scan# : 30  
 BP : m/z 267.2267 Int. : 1.54  
 Output m/z range : 293.1010 to 293.1302 Cut Level : 0.00 %

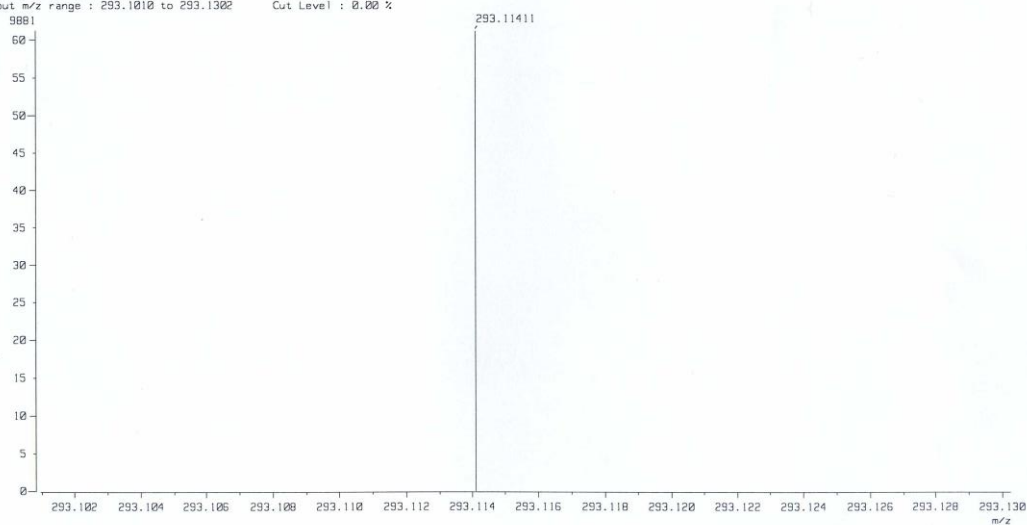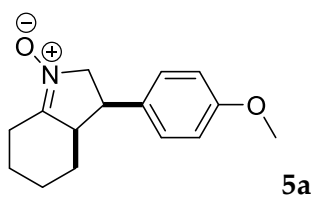

<sup>1</sup>H NMR

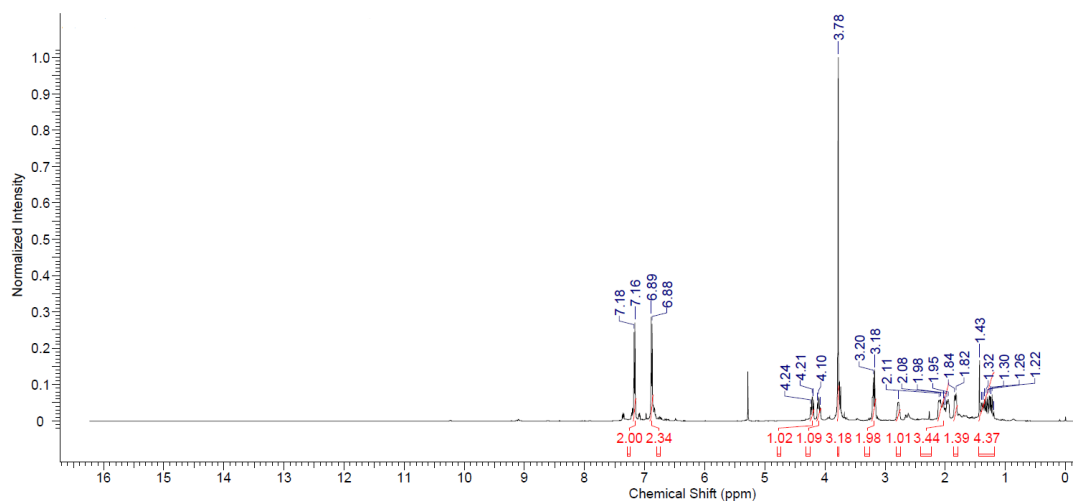

### <sup>13</sup>C NMR

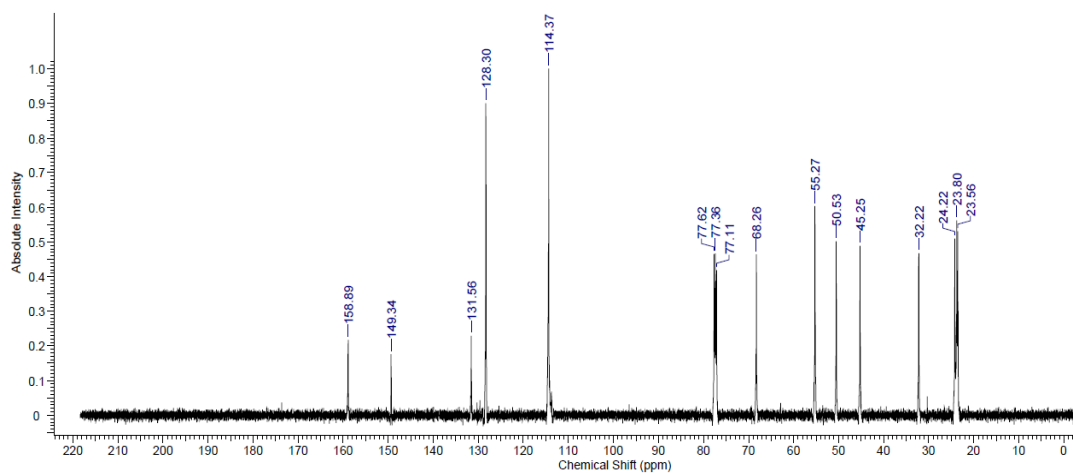

### Mass

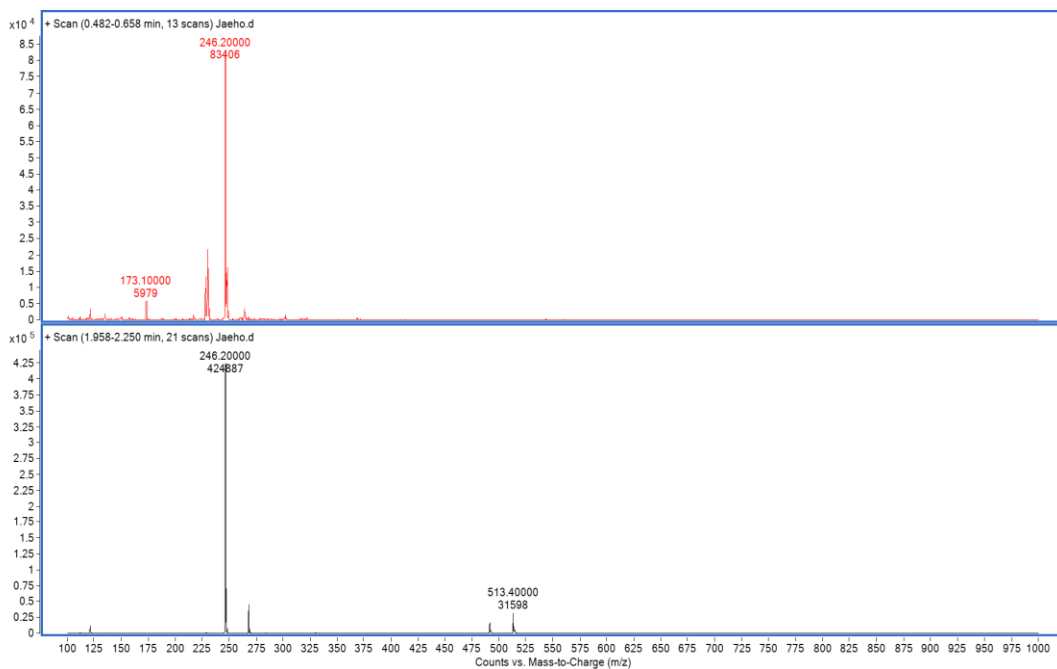

### 3. DFT Calculations for all Calculated Structures

#### Cyclohexanone(1)

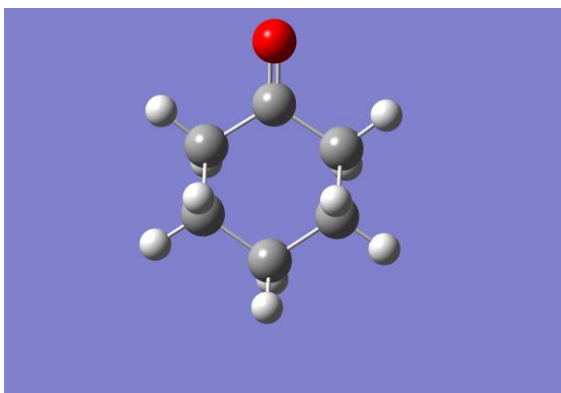

Calculation Type = FREQ

Calculation Method = RB3LYP

Basis Set = 6-31G(d,p)

Charge = 0

Spin = Singlet

Solvation = None

E(RB3LYP) = -308.19901 Hartree

RMS Gradient Norm = 4.33e-07 Hartree/Bohr

Imaginary Freq = 0

Dipole Moment = 2.9299941 Debye

Polarizability = 58.174667 a.u.

Thermo Tab Data Section:

Imaginary Freq = 0

Temperature = 298.15 Kelvin

Pressure = 1 atm

Frequencies scaled by = 1

Electronic Energy (EE) = -308.19901 Hartree

Zero-point Energy Correction = 0.152576 Hartree

Thermal Correction to Energy = 0.158986 Hartree

Thermal Correction to Enthalpy = 0.15993 Hartree

Thermal Correction to Free Energy = 0.122297 Hartree

EE + Zero-point Energy = -308.04644 Hartree  
EE + Thermal Energy Correction = -308.04003 Hartree  
EE + Thermal Enthalpy Correction = -308.03908 Hartree  
EE + Thermal Free Energy Correction = -308.07671 Hartree  
E (Thermal) = 99.765 kcal/mol  
Heat Capacity (Cv) = 24.548 cal/mol-kelvin  
Entropy (S) = 79.206 cal/mol-kelvin

Symbolic Z-matrix:

Charge = 0 Multiplicity = 1

C 0.18374 0.52474 1.27566

H -0.36284 0.92151 2.1354

H 1.22462 0.87608 1.3211

C -0.4527 1.07025 0.

C 0.18374 0.52474 -1.27566

H -0.36284 0.92151 -2.1354

H 1.22462 0.87608 -1.3211

C 0.18374 -1.02885 -1.26798

H 0.68647 -1.39851 -2.16899

H -0.85312 -1.38766 -1.29413

C 0.87835 -1.5703 0.

H 0.85701 -2.66668 0.

H 1.93168 -1.2576 0.

C 0.18374 -1.02885 1.26798

H 0.68647 -1.39851 2.16899

H -0.85312 -1.38766 1.29413

O -1.39283 1.86889 0.

**Nitrostyrene(2)**

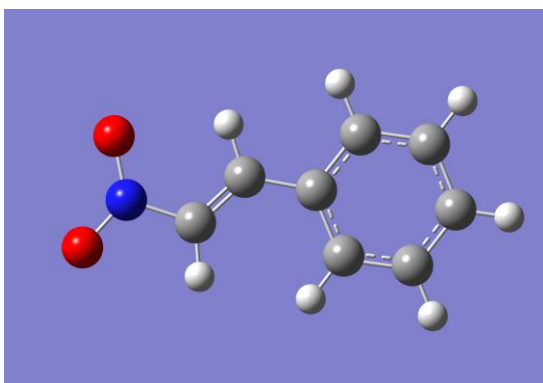

Calculation Type = FREQ

Calculation Method = RB3LYP

Basis Set = 6-31G(d,p)

Charge = 0

Spin = Singlet

Solvation = None

E(RB3LYP) = -511.28944 Hartree

RMS Gradient Norm = 1.82e-07 Hartree/Bohr

Imaginary Freq = 0

Dipole Moment = 5.5830437 Debye

Polarizability = 97.879667 a.u.

Thermo Tab Data Section:

Imaginary Freq = 0

Temperature = 298.15 Kelvin

Pressure = 1 atm

Frequencies scaled by = 1

Electronic Energy (EE) = -511.28944 Hartree

Zero-point Energy Correction = 0.136109 Hartree

Thermal Correction to Energy = 0.145175 Hartree

Thermal Correction to Enthalpy = 0.14612 Hartree

Thermal Correction to Free Energy = 0.100523 Hartree

EE + Zero-point Energy = -511.15333 Hartree

EE + Thermal Energy Correction = -511.14426 Hartree  
EE + Thermal Enthalpy Correction = -511.14332 Hartree  
EE + Thermal Free Energy Correction = -511.18892 Hartree  
E (Thermal) = 91.099 kcal/mol  
Heat Capacity (Cv) = 33.914 cal/mol-kelvin  
Entropy (S) = 95.966 cal/mol-kelvin

Symbolic Z-matrix:

Charge = 0 Multiplicity = 1  
O -3.86266 0.96927 -0.00009  
O -3.23122 -1.23618 0.00009  
N -2.98363 0.02854 -0.00001  
C -1.60198 0.47697 -0.00004  
C -0.61631 -0.42547 0.00003  
H -1.52012 1.55148 -0.00013  
C 1.36347 1.13408 0.00006  
C 0.81932 -0.166 0.00002  
C 1.69946 -1.26498 -0.00004  
C 3.07945 -1.07331 -0.00006  
C 3.60403 0.2208 -0.00002  
C 2.74107 1.32312 0.00004  
H 0.70517 1.99468 0.00013  
H 1.29026 -2.26934 -0.00006  
H 3.74341 -1.92936 -0.0001  
H 4.67686 0.37262 -0.00004  
H 3.14696 2.3277 0.00008  
H -0.93714 -1.46361 0.0001

**Cat(3)**

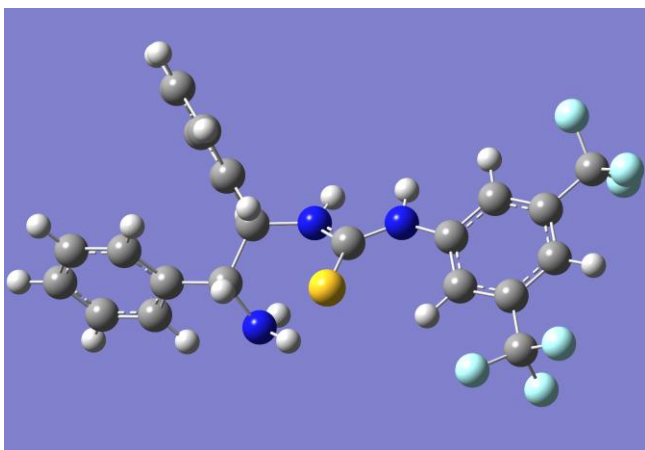

Calculation Type = FREQ

Calculation Method = RB3LYP

Basis Set = 6-31G(d,p)

Charge = 0

Spin = Singlet

Solvation = None

E(RB3LYP) = -2038.4288 Hartree

RMS Gradient Norm = 2.27e-07 Hartree/Bohr

Imaginary Freq = 0

Dipole Moment = 6.5837473 Debye

Polarizability = 260.52867 a.u.

Thermo Tab Data Section:

Imaginary Freq = 0

Temperature = 298.15 Kelvin

Pressure = 1 atm

Frequencies scaled by = 1

Electronic Energy (EE) = -2038.4288 Hartree

Zero-point Energy Correction = 0.390127 Hartree

Thermal Correction to Energy = 0.419217 Hartree

Thermal Correction to Enthalpy = 0.420161 Hartree

Thermal Correction to Free Energy = 0.324789 Hartree  
EE + Zero-point Energy = -2038.0387 Hartree  
EE + Thermal Energy Correction = -2038.0096 Hartree  
EE + Thermal Enthalpy Correction = -2038.0086 Hartree  
EE + Thermal Free Energy Correction = -2038.104 Hartree  
E (Thermal) = 263.062 kcal/mol  
Heat Capacity (Cv) = 110.826 cal/mol-kelvin  
Entropy (S) = 200.727 cal/mol-kelvin

Symbolic Z-matrix:

Charge = 0 Multiplicity = 1  
C 5.74711 -0.78311 -2.1758  
C 5.29937 -0.43973 -0.88738  
C 6.15799 -0.65119 0.19986  
C 7.42543 -1.21562 0.00722  
C 7.8571 -1.56314 -1.27378  
C 7.0129 -1.33702 -2.36849  
H 5.08006 -0.63131 -3.01763  
H 5.86139 -0.36951 1.20179  
H 8.0742 -1.37641 0.86262  
H 8.8399 -1.99868 -1.4214  
H 7.34017 -1.59788 -3.37019  
C 4.05814 1.24168 1.63874  
C 4.26162 0.87367 2.97981  
C 4.89927 1.74024 3.86985  
C 5.33905 2.99336 3.42846  
C 5.13185 3.37049 2.09892  
C 4.49141 2.50311 1.20716  
H 3.92382 -0.10157 3.3244  
H 5.05481 1.43991 4.90118  
H 5.83854 3.66844 4.11552

H 5.46497 4.34327 1.75252  
H 4.32106 2.82013 0.18579  
C 3.90344 0.18845 -0.75592  
C 3.3613 0.23871 0.71698  
N 1.88773 0.40798 0.77769  
N 2.92716 -0.42731 -1.68088  
H 3.51456 -0.75581 1.15031  
H 3.97185 1.22284 -1.10368  
H 1.37675 -0.40705 1.13937  
C 1.10299 1.38213 0.24395  
C -1.67223 2.53293 -0.85512  
C -2.98896 2.8615 -1.19717  
C -4.09174 2.37543 -0.49682  
C -3.84297 1.54371 0.59826  
C -2.54883 1.22897 0.97977  
C -1.43719 1.69827 0.24881  
H -5.09866 2.65325 -0.78084  
H -2.37739 0.60988 1.84758  
N -0.1959 1.25192 0.72118  
S 1.61523 2.58787 -0.89578  
H -0.27597 0.63505 1.54775  
F -6.01962 1.7715 1.60881  
F -4.56388 0.30088 2.52336  
F -5.55108 -0.15891 0.58918  
F -3.32184 2.91209 -3.57734  
F -4.4125 4.41224 -2.33724  
F -2.19318 4.59691 -2.64858  
C -4.97355 0.91138 1.33209  
C -3.22171 3.6913 -2.41806  
H 2.08747 0.1157 -1.68913  
H -0.84013 2.93988 -1.41126

H 2.71994 -1.35698 -1.37631

**H<sub>2</sub>O**

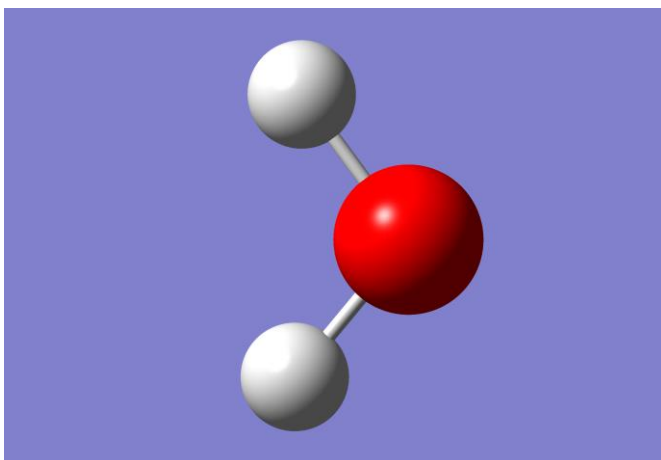

Calculation Type = FREQ

Calculation Method = RB3LYP

Basis Set = 6-31G(d,p)

Charge = 0

Spin = Singlet

Solvation = None

E(RB3LYP) = -75.973965 Hartree

RMS Gradient Norm = 0.000115305 Hartree/Bohr

Imaginary Freq = 0

Dipole Moment = 2.2397 Debye

Polarizability = 4.2726667 a.u.

Thermo Tab Data Section:

Imaginary Freq = 0

Temperature = 298.15 Kelvin

Pressure = 1 atm

Frequencies scaled by = 1

Electronic Energy (EE) = -75.973965 Hartree

Zero-point Energy Correction = 0.019746 Hartree

Thermal Correction to Energy = 0.022581 Hartree

Thermal Correction to Enthalpy = 0.023525 Hartree

Thermal Correction to Free Energy = 0.002 Hartree

EE + Zero-point Energy = -75.954218 Hartree

EE + Thermal Energy Correction = -75.951384 Hartree

EE + Thermal Enthalpy Correction = -75.95044 Hartree

EE + Thermal Free Energy Correction = -75.971965 Hartree

E (Thermal) = 14.17 kcal/mol

Heat Capacity (Cv) = 5.999 cal/mol-kelvin

Entropy (S) = 45.304 cal/mol-kelvin

Symbolic Z-matrix:

Charge = 0 Multiplicity = 1

O -0.0579 2.33917 -0.16269

H 0.9021 2.33917 -0.16269

H -0.37836 3.24411 -0.16269

**IM**

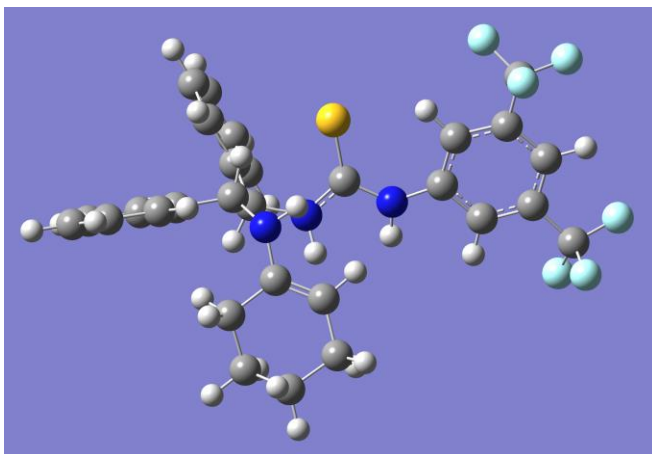

Calculation Type = FREQ

Calculation Method = RB3LYP

Basis Set = 6-31G(d,p)

Charge = 0

Spin = Singlet

Solvation = None

E(RB3LYP) = -2270.6162 Hartree

RMS Gradient Norm = 5.86e-07 Hartree/Bohr

Imaginary Freq = 0

Dipole Moment = 6.1827507 Debye

Polarizability = 319.49967 a.u.

Thermo Tab Data Section:

Imaginary Freq = 0

Temperature = 298.15 Kelvin

Pressure = 1 atm

Frequencies scaled by = 1

Electronic Energy (EE) = -2270.6162 Hartree

Zero-point Energy Correction = 0.518833 Hartree

Thermal Correction to Energy = 0.553307 Hartree

Thermal Correction to Enthalpy = 0.554252 Hartree

Thermal Correction to Free Energy = 0.446535 Hartree

EE + Zero-point Energy = -2270.0974 Hartree

EE + Thermal Energy Correction = -2270.0629 Hartree

EE + Thermal Enthalpy Correction = -2270.0619 Hartree

EE + Thermal Free Energy Correction = -2270.1697 Hartree

E (Thermal) = 347.206 kcal/mol

Heat Capacity (Cv) = 132.447 cal/mol-kelvin

Entropy (S) = 226.71 cal/mol-kelvin

Symbolic Z-matrix:

Charge = 0 Multiplicity = 1

C 5.62403 -1.10816 -2.13669

C 5.17186 -0.80836 -0.84143

C 5.9567 -1.20195 0.25006

C 7.16002 -1.88727 0.05079

C 7.59811 -2.18247 -1.23931

C 6.82495 -1.78592 -2.3353

H 5.00739 -0.81741 -2.97815

H 5.65192 -0.95812 1.25956

H 7.75331 -2.1841 0.90822

H 8.5313 -2.7122 -1.39189

H 7.15792 -2.00749 -3.34307

C 3.99502 1.03539 1.70308

C 3.51183 1.15176 3.01552

C 4.12082 2.00872 3.92991

C 5.23007 2.76715 3.54585

C 5.71933 2.65735 2.24471

C 5.10729 1.79688 1.32909

H 2.64169 0.57669 3.31102

H 3.73048 2.08725 4.93818

H 5.70496 3.4369 4.2533

H 6.57604 3.24419 1.93435  
H 5.50878 1.72536 0.32742  
C 3.86123 -0.0248 -0.7011  
C 3.2962 0.03469 0.76875  
N 1.83058 0.23508 0.79767  
N 2.84352 -0.48562 -1.66909  
H 3.42452 -0.96527 1.20073  
H 4.04575 1.01194 -0.99538  
H 1.28108 -0.61035 1.00138  
C 1.15812 1.32889 0.34653  
C -1.31833 3.12093 -0.58065  
C -2.54068 3.68645 -0.94293  
C -3.76019 3.15639 -0.53882  
C -3.73599 2.00947 0.25124  
C -2.53747 1.43432 0.6293  
C -1.30114 1.96707 0.21685  
H -4.68876 3.63977 -0.80811  
H -2.53744 0.56532 1.26751  
N -0.17966 1.25612 0.6624  
S 1.89931 2.62444 -0.53808  
H -0.43371 0.49509 1.31312  
F -5.96666 2.24372 1.03079  
F -4.79262 0.46289 1.71784  
F -5.55434 0.56632 -0.34338  
F -2.55251 4.51995 -3.17492  
F -3.65324 5.65264 -1.63065  
F -1.41592 5.64389 -1.65079  
C -5.00088 1.34716 0.66433  
C -2.5363 4.87489 -1.84425  
C 2.1582 -1.70756 -1.61086  
H 2.27989 0.29813 -2.00706

H -0.39278 3.58049 -0.88949  
C 0.86547 -1.79356 -2.00995  
C 0.10769 -3.08747 -2.19866  
H 0.34026 -0.87892 -2.27874  
H -0.42382 -3.07062 -3.16026  
H -0.66096 -3.17802 -1.41573  
C 2.93665 -2.9427 -1.18066  
H 3.67747 -3.17471 -1.95657  
H 3.50891 -2.72891 -0.27235  
C 2.00948 -4.15351 -0.94392  
H 2.6184 -5.05465 -0.80932  
H 1.42729 -3.98382 -0.0324  
C 1.04116 -4.31689 -2.13221  
H 0.44929 -5.23455 -2.03071  
H 1.61802 -4.38944 -3.063

**TS1**

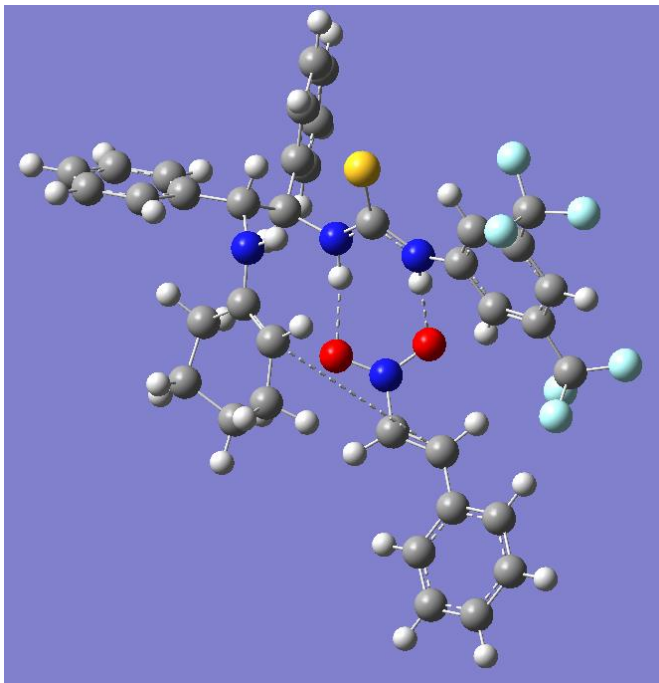

Calculation Type = FREQ

Calculation Method = RB3LYP

Basis Set = 6-31G(d,p)

Charge = 0

Spin = Singlet

Solvation = None

$E(\text{RB3LYP}) = -2781.957$  Hartree

RMS Gradient Norm =  $3.01\text{e-}07$  Hartree/Bohr

Imaginary Freq = 0

Dipole Moment = 9.5685843 Debye

Polarizability = 521.921 a.u.

Temperature = 298.15 Kelvin

Pressure = 1 atm

Frequencies scaled by = 1

Electronic Energy (EE) = -2781.957 Hartree

Zero-point Energy Correction = 0.658736 Hartree

Thermal Correction to Energy = 0.703378 Hartree

Thermal Correction to Enthalpy = 0.704323 Hartree

Thermal Correction to Free Energy = 0.574802 Hartree

EE + Zero-point Energy = -2781.2983 Hartree

EE + Thermal Energy Correction = -2781.2536 Hartree

EE + Thermal Enthalpy Correction = -2781.2527 Hartree

EE + Thermal Free Energy Correction = -2781.3822 Hartree

E (Thermal) = 441.377 kcal/mol

Heat Capacity (Cv) = 170.567 cal/mol-kelvin

Entropy (S) = 272.598 cal/mol-kelvin

Symbolic Z-matrix:

Charge = 0 Multiplicity = 1

C -4.89571 -3.26206 -1.66229

C -4.40239 -2.39198 -0.67775

C -5.26792 -1.99522 0.34946

C -6.58963 -2.45123 0.39055

C -7.06828 -3.3112 -0.59858

C -6.2137 -3.71668 -1.62793

H -4.23855 -3.58009 -2.46349

H -4.91532 -1.34385 1.13619

H -7.24111 -2.13612 1.19742

H -8.09217 -3.6644 -0.56711

H -6.57332 -4.38673 -2.4001

C -2.37548 -2.46835 1.66305

C -2.8264 -2.01831 2.91382

C -2.92246 -2.89179 3.99894

C -2.56676 -4.23356 3.84646

C -2.11112 -4.69055 2.60726

C -2.01344 -3.81678 1.52183

H -3.10847 -0.97741 3.03879

H -3.27396 -2.52759 4.95728

H -2.64269 -4.91537 4.68513

H -1.82925 -5.72928 2.48293

H -1.63605 -4.17288 0.57432

C -2.94418 -1.93874 -0.81728

C -2.28024 -1.47242 0.50895

N -0.86305 -1.01802 0.31879

N -2.80931 -0.93704 -1.92004

H -2.77685 -0.55393 0.81801

H -2.3794 -2.79791 -1.17155

H -0.66466 -0.18515 0.88242

C 0.22201 -1.68351 -0.14219

C 3.269 -2.48012 -0.42555

C 4.63989 -2.59965 -0.58337

C 5.50898 -1.5415 -0.3359

C 4.97195 -0.34059 0.09403

C 3.60076 -0.18215 0.26688

C 2.72986 -1.24545 -0.00587

H 6.57573 -1.65533 -0.46429

H 3.21134 0.76985 0.61076

N 1.36921 -1.0081 0.24706

S 0.17243 -3.03109 -1.23238

H 1.19712 -0.09017 0.65357

F 7.18307 0.46307 0.19971

F 5.7097 1.26282 1.67238

F 5.59035 1.88384 -0.44397

F 5.84295 -3.7783 -2.24838

F 6.15641 -4.35789 -0.13914

F 4.22821 -4.85142 -1.14854

C 5.86564 0.81139 0.37882

C 5.2082 -3.899 -1.02982

C -2.98538 0.46194 -1.75068

C -4.1549 0.93702 -0.90339

H -3.87723 0.86515 0.15699

O -0.58576 1.62948 1.32893

O 1.52485 2.50323 1.19967

N 0.23858 2.6083 1.11691

C -0.31746 3.8797 0.76491

H -1.94254 -1.13129 -2.43408

H 2.60052 -3.29022 -0.62045

C -4.5702 2.38557 -1.20887

C -2.19145 1.33608 -2.39999

C -2.39275 2.83652 -2.4076

C -3.3415 3.30239 -1.28842

H -1.3652 0.96771 -3.00284

H -2.7958 3.14844 -3.38554

H -1.42064 3.3429 -2.30921

H -3.65234 4.34231 -1.46351

H -2.80244 3.29553 -0.32594

H -5.11651 2.43068 -2.1596

H -5.26597 2.73404 -0.43506

H -5.00392 0.26279 -1.04068

C 0.46196 4.96722 0.83677

H 1.48315 4.83433 1.17835

H -1.34908 3.88485 0.44905

C -1.18728 6.65084 -0.06705

C 0.06325 6.33232 0.50706

C 0.97546 7.375 0.76726

C 0.64513 8.69656 0.4748

C -0.59804 8.99745 -0.08694

C -1.51158 7.97058 -0.35899

H -1.89211 5.86203 -0.29427

H 1.94126 7.1428 1.20124

H 1.35354 9.48883 0.68148

H -0.85418 10.02431 -0.31666

H -2.47162 8.20345 -0.80228

TS2

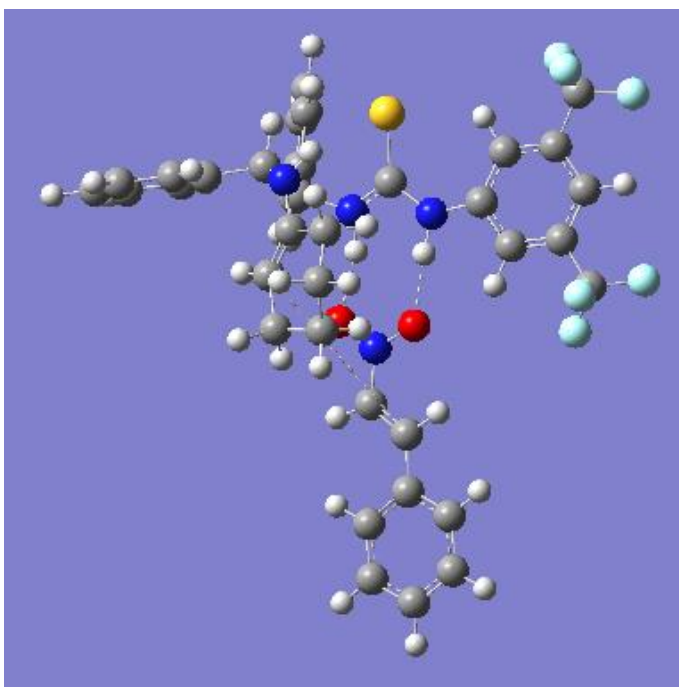

Calculation Type = FREQ

Calculation Method = RB3LYP

Basis Set = 6-31G(d,p)

Charge = 0

Spin = Singlet

Solvation = None

E(RB3LYP) = -2781.954 Hartree

RMS Gradient Norm = 1.42e-07 Hartree/Bohr

Imaginary Freq = 0

Dipole Moment = 12.81188 Debye

Polarizability = 534.43433 a.u.

Temperature = 298.15 Kelvin

Pressure = 1 atm

Frequencies scaled by = 1

Electronic Energy (EE) = -2781.954 Hartree  
Zero-point Energy Correction = 0.658255 Hartree  
Thermal Correction to Energy = 0.703092 Hartree  
Thermal Correction to Enthalpy = 0.704036 Hartree  
Thermal Correction to Free Energy = 0.572146 Hartree  
EE + Zero-point Energy = -2781.2957 Hartree  
EE + Thermal Energy Correction = -2781.2509 Hartree  
EE + Thermal Enthalpy Correction = -2781.25 Hartree  
EE + Thermal Free Energy Correction = -2781.3819 Hartree  
E (Thermal) = 441.197 kcal/mol  
Heat Capacity (Cv) = 170.694 cal/mol-kelvin  
Entropy (S) = 277.586 cal/mol-kelvin

Symbolic Z-matrix:

Charge = 0 Multiplicity = 1

C -3.54727 -3.08977 -2.4706

C -3.0741 -2.94251 -1.15742

C -3.91457 -3.29998 -0.09724

C -5.20234 -3.78719 -0.34198

C -5.66294 -3.92698 -1.64955

C -4.8274 -3.5763 -2.71581

H -2.89946 -2.80653 -3.29301

H -3.56663 -3.22007 0.92946

H -5.8396 -4.06233 0.49186

H -6.66006 -4.30906 -1.83996

H -5.17715 -3.68501 -3.73711

C -0.95209 -3.67536 1.10357

C -1.38883 -3.95051 2.40679

C -1.16877 -5.20194 2.98359

C -0.49954 -6.19493 2.25832

C -0.06145 -5.92101 0.96078

C -0.29399 -4.66811 0.38726

H -1.90462 -3.17883 2.97326

H -1.51442 -5.40104 3.99242

H -0.32226 -7.16905 2.70111

H 0.46328 -6.67945 0.38977

H 0.07588 -4.47625 -0.60545

C -1.65272 -2.42146 -0.98653

C -1.18886 -2.30048 0.50172

N -0.03169 -1.39828 0.69867

N -1.41503 -1.24741 -1.82156

H -1.95993 -1.78113 1.09543

H -1.01509 -3.21458 -1.38093

H -0.09614 -0.81993 1.5423

C 1.12037 -1.24767 0.01296

C 4.23504 -0.49961 0.56689

C 5.51525 -0.00871 0.35226

C 5.73151 1.24579 -0.21345

C 4.63108 2.00751 -0.57339

C 3.33817 1.52186 -0.39038

C 3.12839 0.25745 0.16999

H 6.73282 1.63409 -0.34461

H 2.4861 2.12432 -0.68663

N 1.77244 -0.11942 0.45478

S 1.68824 -2.20696 -1.33956

H 1.17247 0.7144 0.70766

F 6.14416 3.68748 -1.28645

F 4.22517 4.33929 -0.37896

F 4.23304 3.47416 -2.39762

F 7.24555 -1.4999 -0.35212

F 7.69442 -0.07253 1.25759

F 6.3493 -1.8108 1.64573

C 4.81494 3.36852 -1.15681

C 6.6913 -0.84869 0.72349  
C -2.16125 -0.07235 -1.83199  
C -3.25583 0.16103 -1.07793  
O -0.6339 0.47426 2.46685  
O -0.04265 1.8071 0.72036  
N -0.8462 1.5025 1.69228 4  
C -2.02281 2.23407 1.95577  
H -0.43635 -1.17323 -2.1042  
H 4.10599 -1.43303 1.11948  
C -4.1464 1.3726 -1.25914  
C -1.64932 0.9418 -2.85254  
C -2.75732 1.90595 -3.30977  
C -3.47805 2.4933 -2.08627  
H -1.25052 0.39692 -3.71723  
H -3.48105 1.36231 -3.93128  
H -2.32492 2.7046 -3.9255  
H -4.23184 3.22829 -2.39793  
H -2.73881 3.02114 -1.46741  
H -5.07594 1.06734 -1.76773

H -4.44833 1.77059 -0.28137

H -3.61235 -0.61683 -0.40559

C -2.44166 3.25466 1.18007

H -1.84236 3.48474 0.3041

H -2.51611 1.87724 2.84722

C -3.91801 5.13296 0.55374

C -3.60489 4.08184 1.44233

C -4.4287 3.88735 2.57441

C -5.5242 4.7094 2.80033

C -5.8211 5.74749 1.90852

C -5.01529 5.95724 0.78813

H -3.29703 5.29445 -0.31929

H -4.20133 3.09186 3.27542

H -6.14919 4.54921 3.67156

H -6.67593 6.38927 2.09046

H -5.24284 6.76169 0.09814

H -0.81537 1.50991 -2.41251

TS3

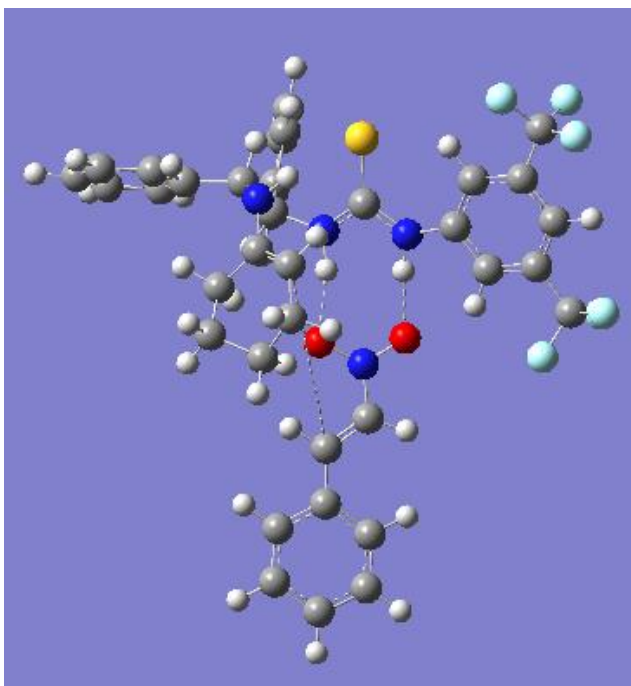

Calculation Type = FREQ

Calculation Method = RB3LYP

Basis Set = 6-31G(d,p)

Charge = 0

Spin = Singlet

Solvation = None

E(RB3LYP) = -2781.9481 Hartree

RMS Gradient Norm = 2.13e-07 Hartree/Bohr

Imaginary Freq = 0

Dipole Moment = 14.737711 Debye

Polarizability = 555.66833 a.u.

Temperature = 298.15 Kelvin

Pressure = 1 atm

Frequencies scaled by = 1

Electronic Energy (EE) = -2781.9481 Hartree

Zero-point Energy Correction = 0.657951 Hartree

Thermal Correction to Energy = 0.703004 Hartree

Thermal Correction to Enthalpy = 0.703948 Hartree

Thermal Correction to Free Energy = 0.570412 Hartree

EE + Zero-point Energy = -2781.2901 Hartree

EE + Thermal Energy Correction = -2781.2451 Hartree

EE + Thermal Enthalpy Correction = -2781.2441 Hartree

EE + Thermal Free Energy Correction = -2781.3777 Hartree

E (Thermal) = 441.142 kcal/mol

Heat Capacity (Cv) = 170.76 cal/mol-kelvin

Entropy (S) = 281.05 cal/mol-kelvin

Symbolic Z-matrix:

Charge = 0 Multiplicity = 1

C -4.67766 -2.90165 -2.04011

C -4.16973 -2.60391 -0.76511

C -5.06697 -2.50402 0.30634

C -6.43943 -2.6807 0.10317

C -6.93497 -2.9659 -1.16846

C -6.04519 -3.07931 -2.24101

H -3.98189 -2.97267 -2.86642

H -4.70088 -2.31316 1.30549

H -7.11736 -2.59942 0.94548

H -7.99902 -3.10278 -1.32347

H -6.41757 -3.30599 -3.23384

C -2.38524 -2.44495 2.01891

C -2.85971 -1.72977 3.13088

C -3.02761 -2.35131 4.36796

C -2.71712 -3.70552 4.51364

C -2.2387 -4.42386 3.41709

C -2.07213 -3.80104 2.17745

H -3.10426 -0.6774 3.02079  
H -3.39948 -1.78303 5.21293  
H -2.84673 -4.19454 5.47216  
H -1.98907 -5.47315 3.52345  
H -1.67184 -4.36247 1.34568  
C -2.64695 -2.47455 -0.59836  
C -2.21841 -1.68674 0.69795  
N -0.8655 -1.08192 0.59449  
N -1.9957 -1.9514 -1.81434  
H -2.87302 -0.81205 0.75784  
H -2.24147 -3.48405 -0.49996  
H -0.88344 -0.05474 0.6201  
C 0.32503 -1.68307 0.35725  
C 3.42421 -2.02709 -0.24764  
C 4.78997 -1.95739 -0.50607  
C 5.51963 -0.79054 -0.32394  
C 4.84411 0.33089 0.14487  
C 3.4845 0.29199 0.40941  
C 2.74227 -0.89099 0.21507

H 6.57109 -0.74677 -0.56768

H 2.98439 1.19208 0.74243

N 1.37158 -0.79889 0.4991

S 0.49555 -3.35807 -0.10152

H 1.11387 0.12143 0.88653

F 6.67584 1.70586 -0.42929

F 6.09355 1.64131 1.69938

F 4.78978 2.69218 0.2615

F 6.58975 -2.88297 -1.72187

F 5.97979 -3.92348 0.12791

F 4.66878 -4.02703 -1.64657

C 5.5973 1.58492 0.41576

C 5.50039 -3.19467 -0.93752

C -2.00368 -0.61497 -2.24551

C -3.199 0.25381 -1.87079

H -3.09011 0.58357 -0.82883

O -1.1866 1.80713 0.45768

O 0.88464 1.85462 1.45903

N -0.16452 2.45101 0.95824

C -0.15409 3.86672 0.99095  
C -1.21856 4.56711 0.55121  
H 0.7623 4.26372 1.39514  
H -1.11391 -2.43924 -1.99191  
H 2.8887 -2.94608 -0.4213  
C -3.30715 1.50389 -2.77039  
C -1.35041 6.01017 0.5193  
C -2.55408 6.56125 0.03028  
C -2.73423 7.94004 -0.02267  
C -1.71613 8.79314 0.41116  
C -0.51499 8.2614 0.89831  
C -0.3307 6.88593 0.95294  
H -3.34134 5.8963 -0.30738  
H -3.66271 8.34978 -0.40082  
H -1.85413 9.8669 0.37016  
H 0.27352 8.9246 1.2324  
H 0.60355 6.48699 1.32918  
C -0.99099 -0.13121 -3.00284  
C -0.93579 1.27008 -3.56607

C -1.93759 2.207 -2.85991

H -0.16108 -0.78904 -3.25117

H -1.16037 1.25616 -4.64557

H 0.08392 1.66732 -3.46665

H -2.01686 3.15768 -3.40035

H -1.57866 2.40376 -1.84195

H -3.62924 1.20606 -3.77624

H -4.06911 2.17822 -2.36079

H -2.05947 3.98556 0.18617

H -4.11113 -0.34384 -1.93384

TS4

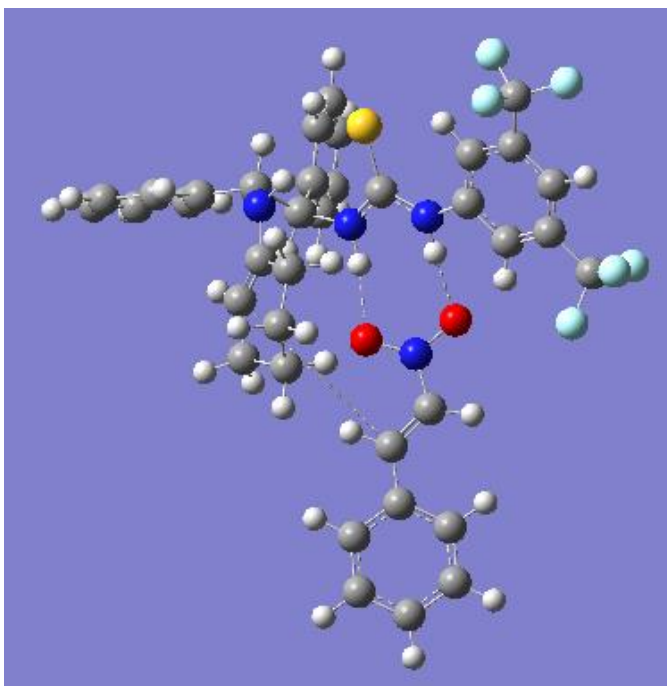

Calculation Type = FREQ

Calculation Method = RB3LYP

Basis Set = 6-31G(d,p)

Charge = 0

Spin = Singlet

Solvation = None

E(RB3LYP) = -2781.9516 Hartree

RMS Gradient Norm = 2.197e-06 Hartree/Bohr

Imaginary Freq = 0

Dipole Moment = 14.308442 Debye

Polarizability = 544.00733 a.u.

Temperature = 298.15 Kelvin

Pressure = 1 atm

Frequencies scaled by = 1

Electronic Energy (EE) = -2781.9516 Hartree

Zero-point Energy Correction = 0.657836 Hartree

Thermal Correction to Energy = 0.702898 Hartree

Thermal Correction to Enthalpy = 0.703842 Hartree

Thermal Correction to Free Energy = 0.570008 Hartree

EE + Zero-point Energy = -2781.2937 Hartree

EE + Thermal Energy Correction = -2781.2487 Hartree

EE + Thermal Enthalpy Correction = -2781.2477 Hartree

EE + Thermal Free Energy Correction = -2781.3816 Hartree

E (Thermal) = 441.075 kcal/mol

Heat Capacity (Cv) = 170.741 cal/mol-kelvin

Entropy (S) = 281.679 cal/mol-kelvin

Symbolic Z-matrix:

Charge = 0 Multiplicity = 1

C -4.27482 -3.9004 -1.37833

C -3.89886 -2.79944 -0.60528

C -4.85499 -2.17101 0.19309

C -6.16455 -2.63346 0.22408

C -6.53279 -3.72995 -0.54804

C -5.58677 -4.36041 -1.34899

H -3.53604 -4.40434 -2.01276

H -4.55132 -1.29673 0.79542

H -6.90499 -2.13263 0.85579

H -7.56434 -4.09548 -0.52538

H -5.87431 -5.22305 -1.95894

C -1.87478 -2.98759 1.70602

C -2.30547 -2.79873 3.02097

C -2.21323 -3.8385 3.93891

C -1.69447 -5.06973 3.55102

C -1.26775 -5.26187 2.24128

C -1.35806 -4.22508 1.3201

H -2.72363 -1.83401 3.33211

H -2.5526 -3.6872 4.96885

H -1.62378 -5.88692 4.27635

H -0.85848 -6.2292 1.93156

H -1.01776 -4.35014 0.27512

C -2.46496 -2.32371 -0.66829

C -1.97737 -1.84743 0.72425

N -0.71268 -1.05065 0.71956

N -2.31279 -1.37891 -1.8059

H -2.74962 -1.10656 1.10131

H -1.80982 -3.20631 -0.94761

H -0.69305 -0.46085 1.52914

C 0.54092 -1.43555 0.2189

C 3.40424 -1.54992 -0.64379

C 4.74263 -1.51114 -1.00481

C 5.60839 -0.54608 -0.48984

C 5.11012 0.39527 0.40448

C 3.77138 0.38252 0.79053

C 2.9192 -0.59532 0.26319

H 6.66323 -0.53988 -0.79418

H 3.40962 1.1428 1.4988

N 1.54806 -0.59418 0.69795

S 0.78883 -2.68573 -0.88571

H 1.29557 0.20368 1.27239

F 7.29863 1.45477 0.59474

F 6.07651 1.45079 2.34784

F 5.59457 2.73841 0.7115

F 5.79826 -1.96306 -3.12483

F 6.36951 -3.22384 -1.49589

F 4.46304 -3.47804 -2.42573

C 6.00846 1.48045 0.99603

C 5.31812 -2.52824 -1.99123

C -2.70463 0.00076 -1.78138

C -3.38109 0.60625 -0.78815

H -3.6515 0.06177 0.13456

O -1.2808 1.86026 2.28886

O 0.76837 1.92224 1.79412

N -0.32256 2.47737 1.86558

C -0.45759 3.86593 1.41529  
C -1.58839 4.34536 0.86406  
H 0.43116 4.52003 1.51762  
H -1.39496 -1.46895 -2.19498  
H 2.61418 -2.31114 -1.03599  
C -3.87016 2.00668 -0.85486  
C -1.6996 5.72236 0.40907  
C -2.85652 6.12728 -0.26864  
C -2.98323 7.44116 -0.70076  
C -1.96242 8.35787 -0.46428  
C -0.80676 7.95928 0.20144  
C -0.67321 6.64708 0.63473  
H -3.65728 5.40199 -0.46726  
H -3.88923 7.75584 -1.23028  
H -2.06771 9.39375 -0.80513  
H -0.00128 8.67924 0.38276  
H 0.23869 6.31372 1.15478  
C -2.34261 0.73728 -3.04363  
C -3.25166 1.93204 -3.27927

C -3.32557 2.79607 -2.0353

H -1.28633 1.06957 -2.97002

H -2.38853 0.06437 -3.92436

H -4.26673 1.58946 -3.56137

H -2.8812 2.52409 -4.13823

H -3.9581 3.68707 -2.21892

H -2.31808 3.19358 -1.79449

H -4.97829 1.98221 -0.88789

H -3.60661 2.53505 0.09151

H -2.48055 3.69964 0.71278

## Product

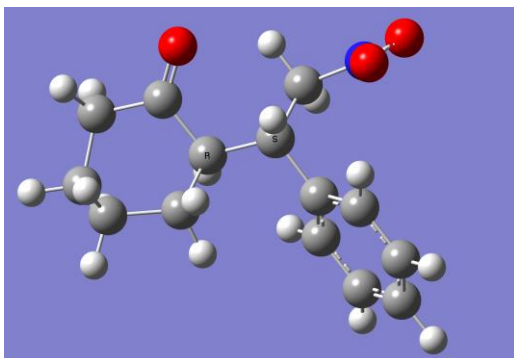

Calculation Type = FREQ

Calculation Method = RB3LYP

Basis Set = 6-31G(d,p)

Charge = 0

Spin = Singlet

Solvation = None

E(RB3LYP) = -819.51642 Hartree

RMS Gradient Norm = 5.91e-07 Hartree/Bohr

Imaginary Freq = 0

Dipole Moment = 5.9999245 Debye

Polarizability = 141.44933 a.u.

Thermo Tab Data Section:

Imaginary Freq = 0

Temperature = 298.15 Kelvin

Pressure = 1 atm

Frequencies scaled by = 1

Electronic Energy (EE) = -819.51642 Hartree

Zero-point Energy Correction = 0.292794 Hartree

Thermal Correction to Energy = 0.309062 Hartree

Thermal Correction to Enthalpy = 0.310006 Hartree

Thermal Correction to Free Energy = 0.246869 Hartree

EE + Zero-point Energy = -819.22362 Hartree  
EE + Thermal Energy Correction = -819.20736 Hartree  
EE + Thermal Enthalpy Correction = -819.20641 Hartree  
EE + Thermal Free Energy Correction = -819.26955 Hartree  
E (Thermal) = 193.939 kcal/mol  
Heat Capacity (Cv) = 61.819 cal/mol-kelvin  
Entropy (S) = 132.882 cal/mol-kelvin

Symbolic Z-matrix:

Charge = 0 Multiplicity = 1  
C 2.43858 0.88172 -0.00108  
O -1.85712 2.3288 -1.15887  
O -2.36937 3.02426 0.95151  
N -1.661 2.38286 0.10719  
C -0.42554 1.68178 0.66275  
C 1.30818 -0.12515 0.17492  
C 1.62572 -1.38366 -0.7082  
H 1.27495 -1.18128 -1.72563  
H 1.03433 -2.21664 -0.31978  
C -0.08373 0.44707 -0.18712  
H -0.67692 1.45202 1.69604  
C -1.30105 -1.41317 1.07528  
C -1.195 -0.59573 -0.05997  
C -2.16129 -0.71797 -1.06766  
C -3.19452 -1.65044 -0.95438  
C -3.28209 -2.46966 0.17236  
C -2.3338 -2.34503 1.19052  
H -0.57517 -1.3258 1.87716  
H -2.11569 -0.05622 -1.92306  
H -3.93345 -1.73103 -1.74329  
H -4.08393 -3.19341 0.26052

H -2.39949 -2.9705 2.07356  
C 3.81093 0.36021 0.43201  
H 4.54869 0.7483 -0.27968  
H 4.04134 0.81002 1.40893  
C 3.86814 -1.18153 0.50163  
H 4.91196 -1.51201 0.52455  
H 3.38949 -1.54427 1.41948  
C 3.13897 -1.75434 -0.73213  
H 3.25204 -2.84243 -0.77909  
H 3.60931 -1.33611 -1.63117  
H 0.3753 2.41863 0.58193  
H -0.03975 0.80044 -1.221  
O 2.27692 2.02686 -0.44141  
H 1.32959 -0.44369 1.22683

## 4 . Reference

1. da Silva, T. L.; Rambo, R. S.; Jacoby, C. G.; Schneider, P. H. Asymmetric Michael reaction promoted by chiral thiazolidine-thiourea catalyst. *Tetrahedron* **2020**, *76*, 130874
2. Carlos C.-H.; Eduardo M.-M.; Perla E. H.-G.; Eusebio J. Synthesis of a New N-Diaminophosphoryl-N'-[(2S)-2-pyrrolidinylmethyl]thiourea as a Chiral Organocatalyst for the Stereoselective Michael Addition of Cyclohexanone to Nitrostyrenes and Chalcones - Application in Cascade Processes for the Synthesis of Polycyclic Systems. *European Journal of Organic Chemistry* **2018**, *48*, 6890-6900
3. Mahato, C. K.; Mukherjee, S.; Kundu, M.; Pramanik, A. Pyrrolidine-Oxadiazolone Conjugates as Organocatalysts in Asymmetric Michael Reaction. *Journal of Organic Chemistry* **2019**, *84*, 1053-1063
4. Vishnumaya; Singh, V. K. Highly Enantioselective Water-Compatible Organocatalyst for Michael Reaction of Ketones to Nitroolefins. *Organic Letters* **2007**, *9*, 1117-1119
5. Lan, Y.; Yang, C.; Zhang, Y.; An, W.; Xue, H.; Ding, S.; Zhou, P.; Wang, W. Pyrrolidine-based chiral porous polymers for heterogeneous organocatalysis in water. *Polymer Chemistry* **2019**, *10*, 3298-3305
6. Andrea R.-O.; María d. G. R.; Fernando P. C. Densely Substituted L-Proline Esters as Catalysts for Asymmetric Michael Additions of Ketones to Nitroalkenes. *Journal of Organic Chemistry* **2015**, *80*, 5588-5599
7. Shim, J. H.; Nam, S. H.; Kim, B. S.; Ha, D. C. Organocatalytic Asymmetric Michael Addition of Ketones to  $\alpha$ ,  $\beta$ -Unsaturated Nitro Compounds. *Catalysts* **2020**, *10*, 618-629

8. Pansare, S. V.; Ligampally, R.; Kirby, R. L. Stereoselective Synthesis of 3-Aryloctahydroindoles and Application in a Formal Synthesis of (-)-Pancracine. *Org. Lett.* **2010**, *12*, 556-559
